# Supplementary material for: Differential Metabolic Stability of 4α,25- and 4β,25-Dihydroxyvitamin D3 and Identification of Their Metabolites
Source: MDPI journal article supplement (doi:10.3390/biom13071036), 2023-06-24

## Differential metabolic stability of 4 $\alpha$ ,25- and 4 $\beta$ ,25-dihydroxyvitamin D<sub>3</sub> and identification of their metabolites

Yuka Mizumoto,<sup>1</sup> Ryota Sakamoto,<sup>1</sup> Kazuto Ijima,<sup>1</sup> Naoto Nakaya,<sup>2</sup> Minami Odagi,<sup>1</sup> Masayuki Tera,<sup>1</sup> Takatsugu Hirokawa,<sup>3,4</sup> Toshiyuki Sakaki,<sup>2,\*</sup> Kaori Yasuda,<sup>2,\*</sup> Kazuo Nagasawa<sup>1,\*</sup>

1 Department of Biotechnology and Life Science, Faculty of Engineering, Tokyo University of Agriculture and Technology, 2-24-16, Naka-cho, Koganei 184-8588, Tokyo, Japan

2 Faculty of Engineering, Toyama Prefectural University, 5180 Kurokawa, Imizu 939-0398, Toyama, Japan

3 Transborder Medical Research Center, University of Tsukuba, 1-1-1 Tennodai, Tsukuba 305-8575, Ibaraki, Japan

4 Division of Biomedical Science, Faculty of Medicine, University of Tsukuba, 1-1-1 Tennodai, Tsukuba 305-8575, Ibaraki, Japan

\* Correspondence: tsakaki@pu-toyama.ac.jp (T.S.); kyasuda@pu-toyama.ac.jp (K.Y.); knaga@cc.tuat.ac.jp (K.N.)

### Table of Contents

|                                                                                              |    |
|----------------------------------------------------------------------------------------------|----|
| 1. HPLC profiles of metabolism of <b>6a</b> and <b>6b</b> by CYP24A1.....                    | S2 |
| 2. HPLC profiles of metabolism of <b>6a</b> and <b>6b</b> by CYP24A1 with chiral column..... | S3 |
| 3. <sup>1</sup> H and <sup>13</sup> C NMR Spectra.....                                       | S4 |

1. HPLC profiles of metabolism of **6a** and **6b** by CYP24A1

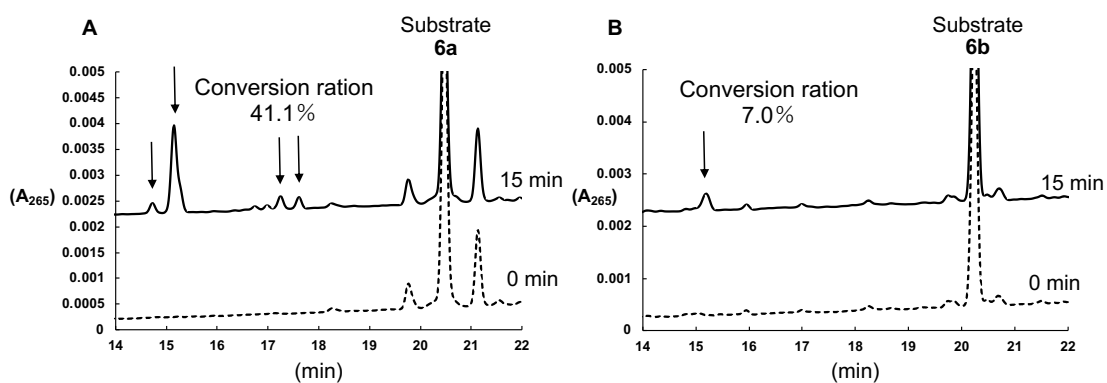

**Figure S1. A)** HPLC profiles of metabolites of **6a** at 0 min (dotted line) and 15 min (solid line) after incubation with CYP24A1. The peaks marked with arrows indicate metabolites. **B)** HPLC profiles of metabolites of **6b** at 0 min (dotted line) and 15 min (solid line) after incubation with CYP24A1. The peaks marked with arrows indicate metabolites.

## 2. HPLC profiles of metabolism of **6a** and **6b** by CYP24A1 with chiral column

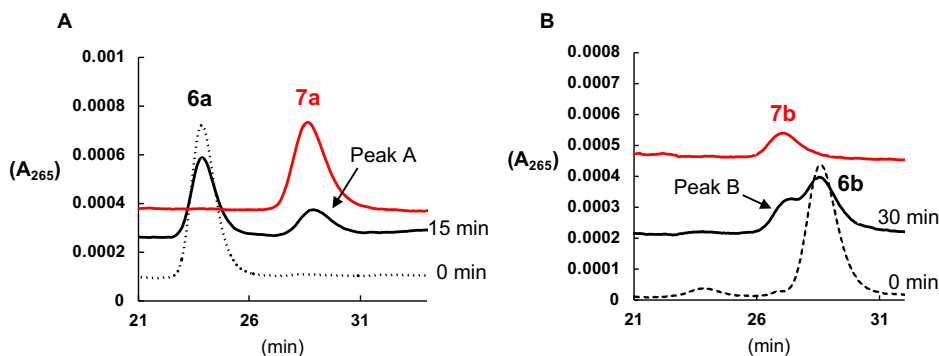

**Figure S2. A)** HPLC profiles of **7a** (red line), and metabolites of **6a** after incubation with CYP24A1 for 0 min (dotted line) and 15 min (solid line). Peak A marked with an arrow indicates a major metabolite. **B)** HPLC profiles of **7b** (red line), and metabolites of **6b** after incubation with CYP24A1 for 0 min (dotted line) and 30 min (solid line) after incubation with CYP24A1. Peak B marked with an arrow indicates a major metabolite. HPLC was performed under the following conditions: column, SUMICHIRAL OA-7000 (Sumika Chemical Analysis Service ,Ltd., Tokyo, Japan); UV detection, 265 nm; flow-rate, 0.7 mL/min; mobile phase,  $\text{CH}_3\text{CN}:\text{H}_2\text{O} = 88:12$  (isocratic).





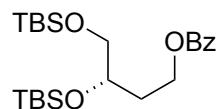

**S1**  
CDCl<sub>3</sub>, 75 MHz

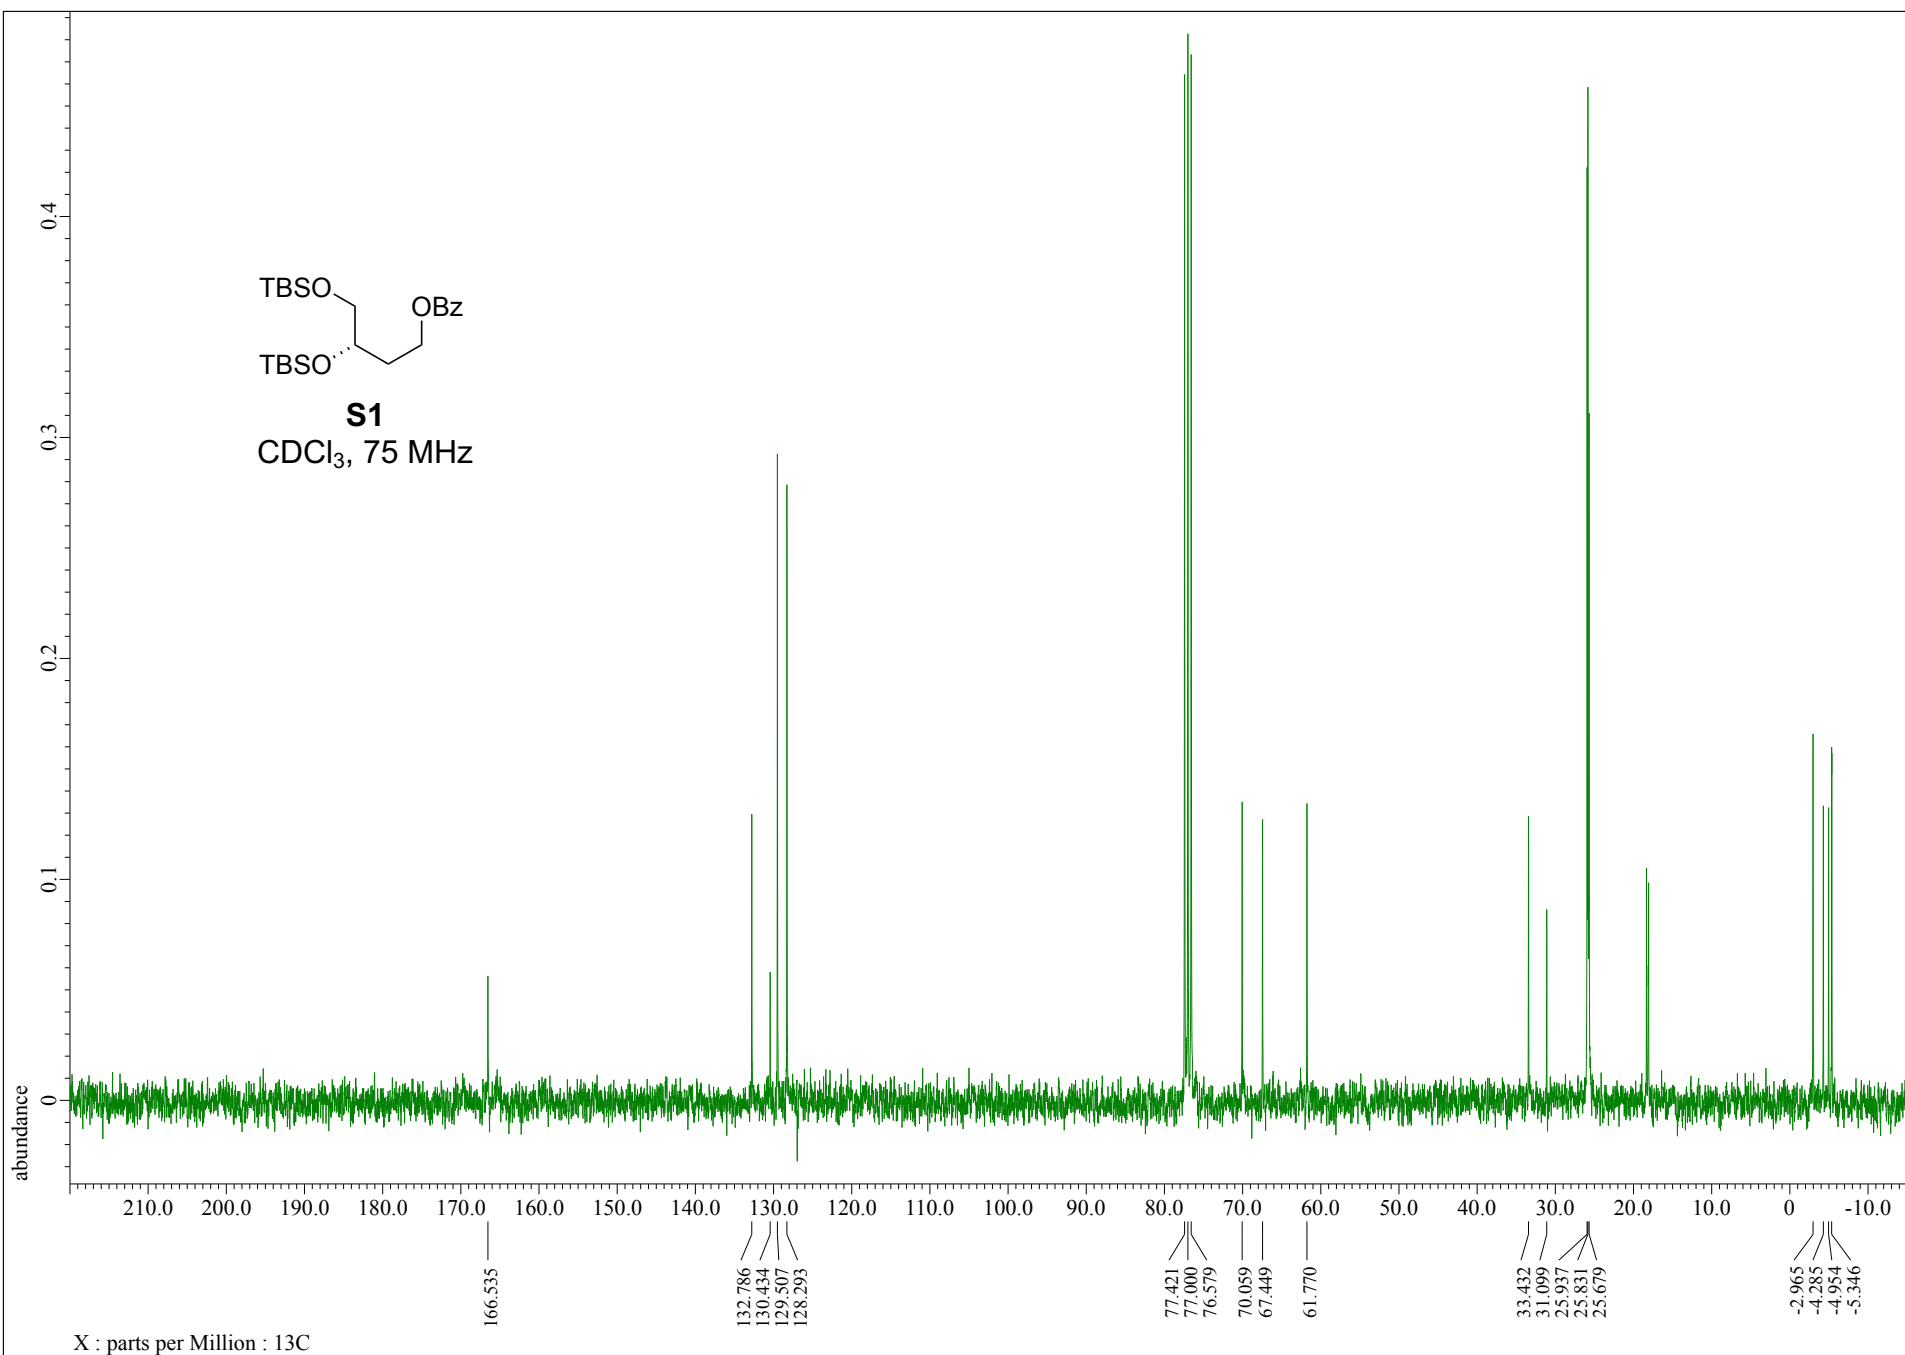

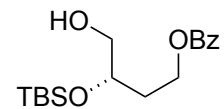

9

CDCl<sub>3</sub>, 300 MHz

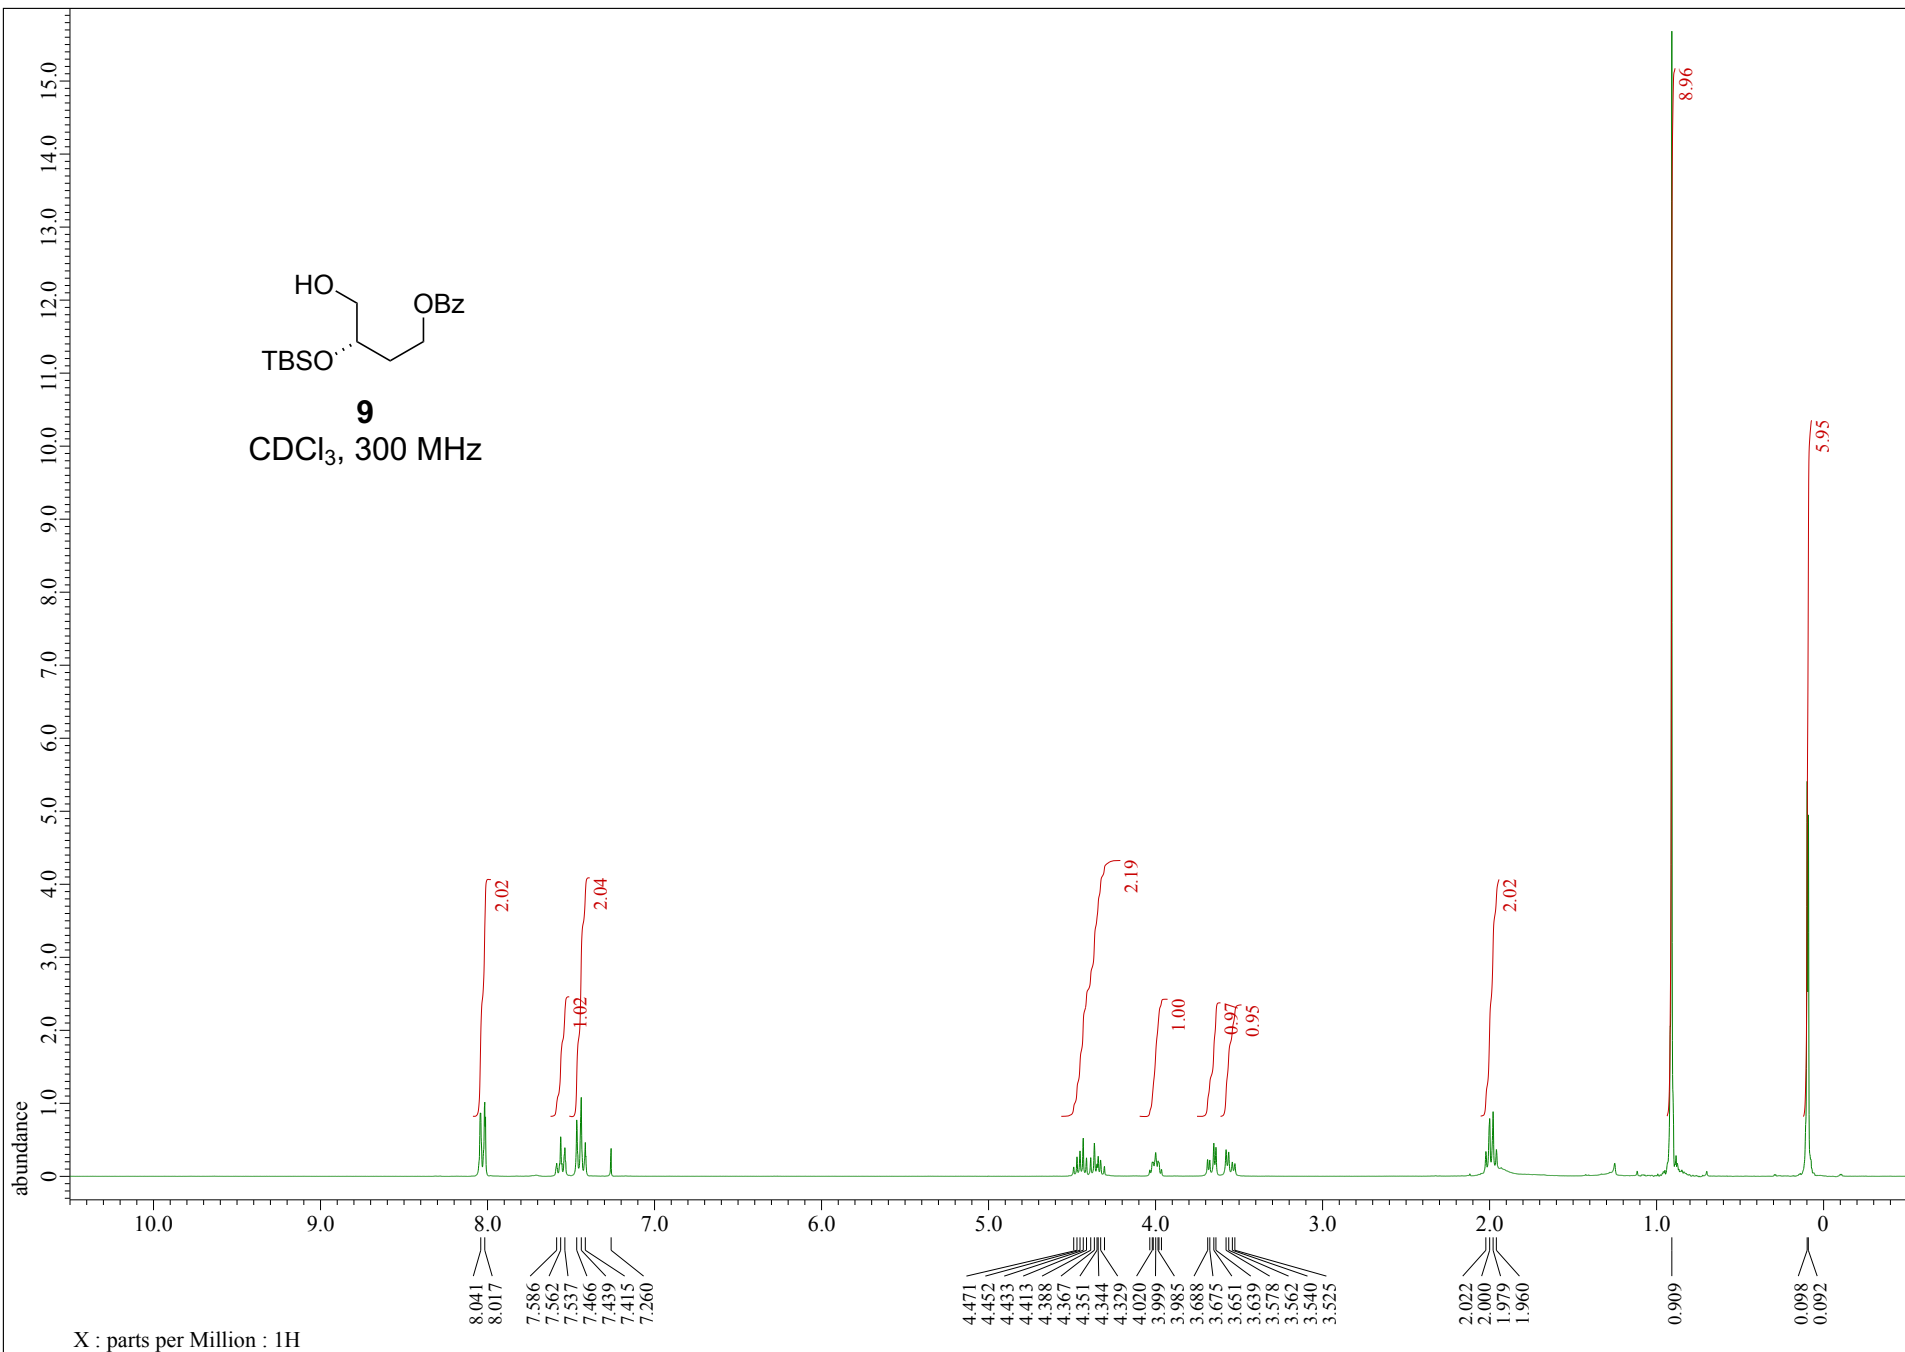

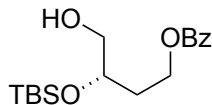

9

CDCl<sub>3</sub>, 75 MHz

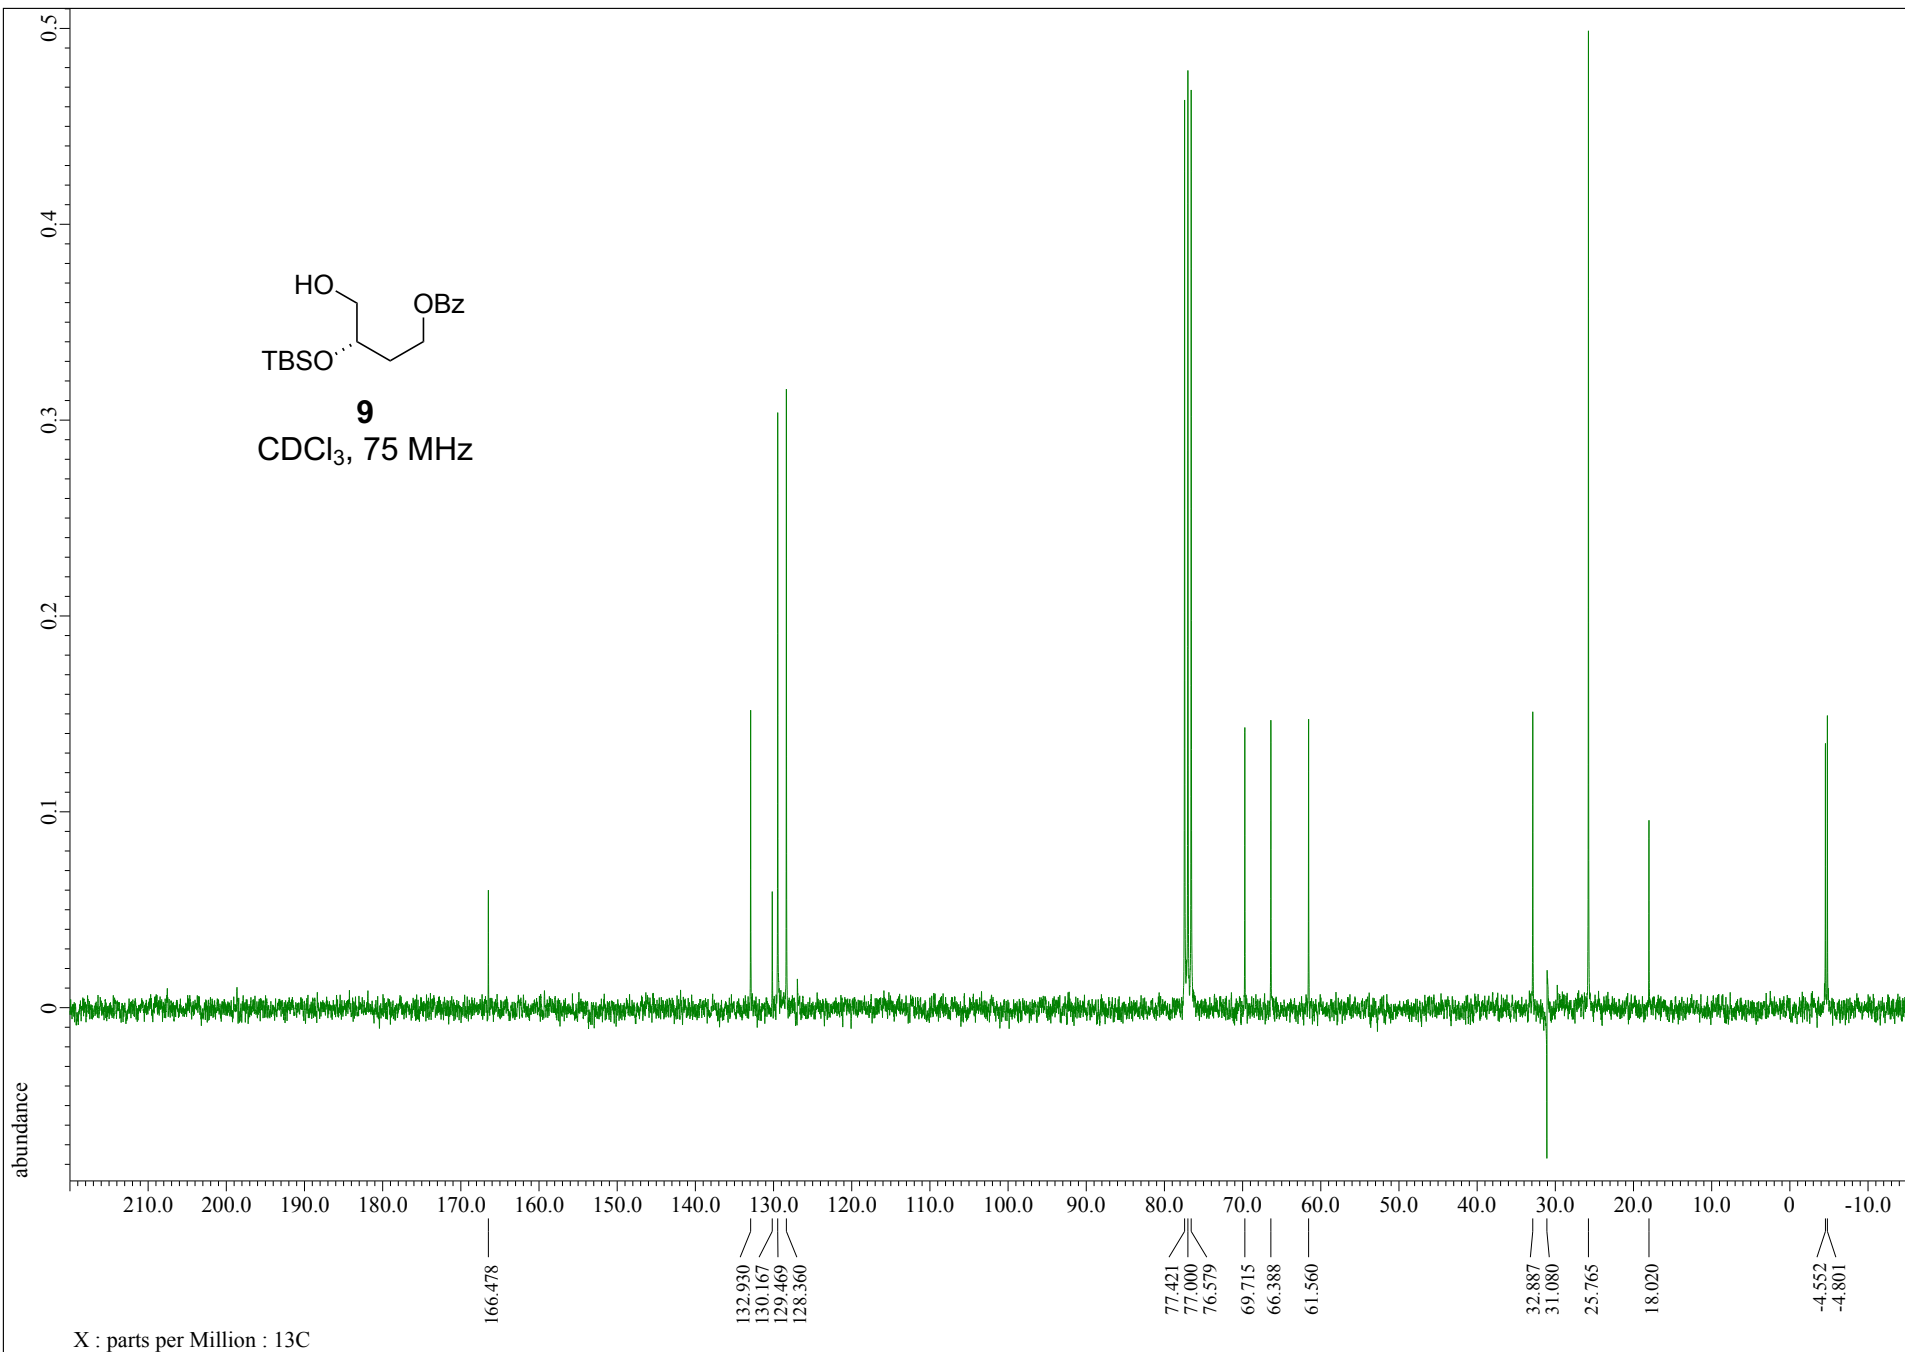

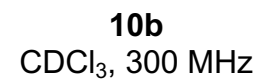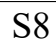

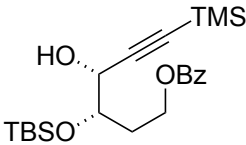

CDCl<sub>3</sub>, 75 MHz

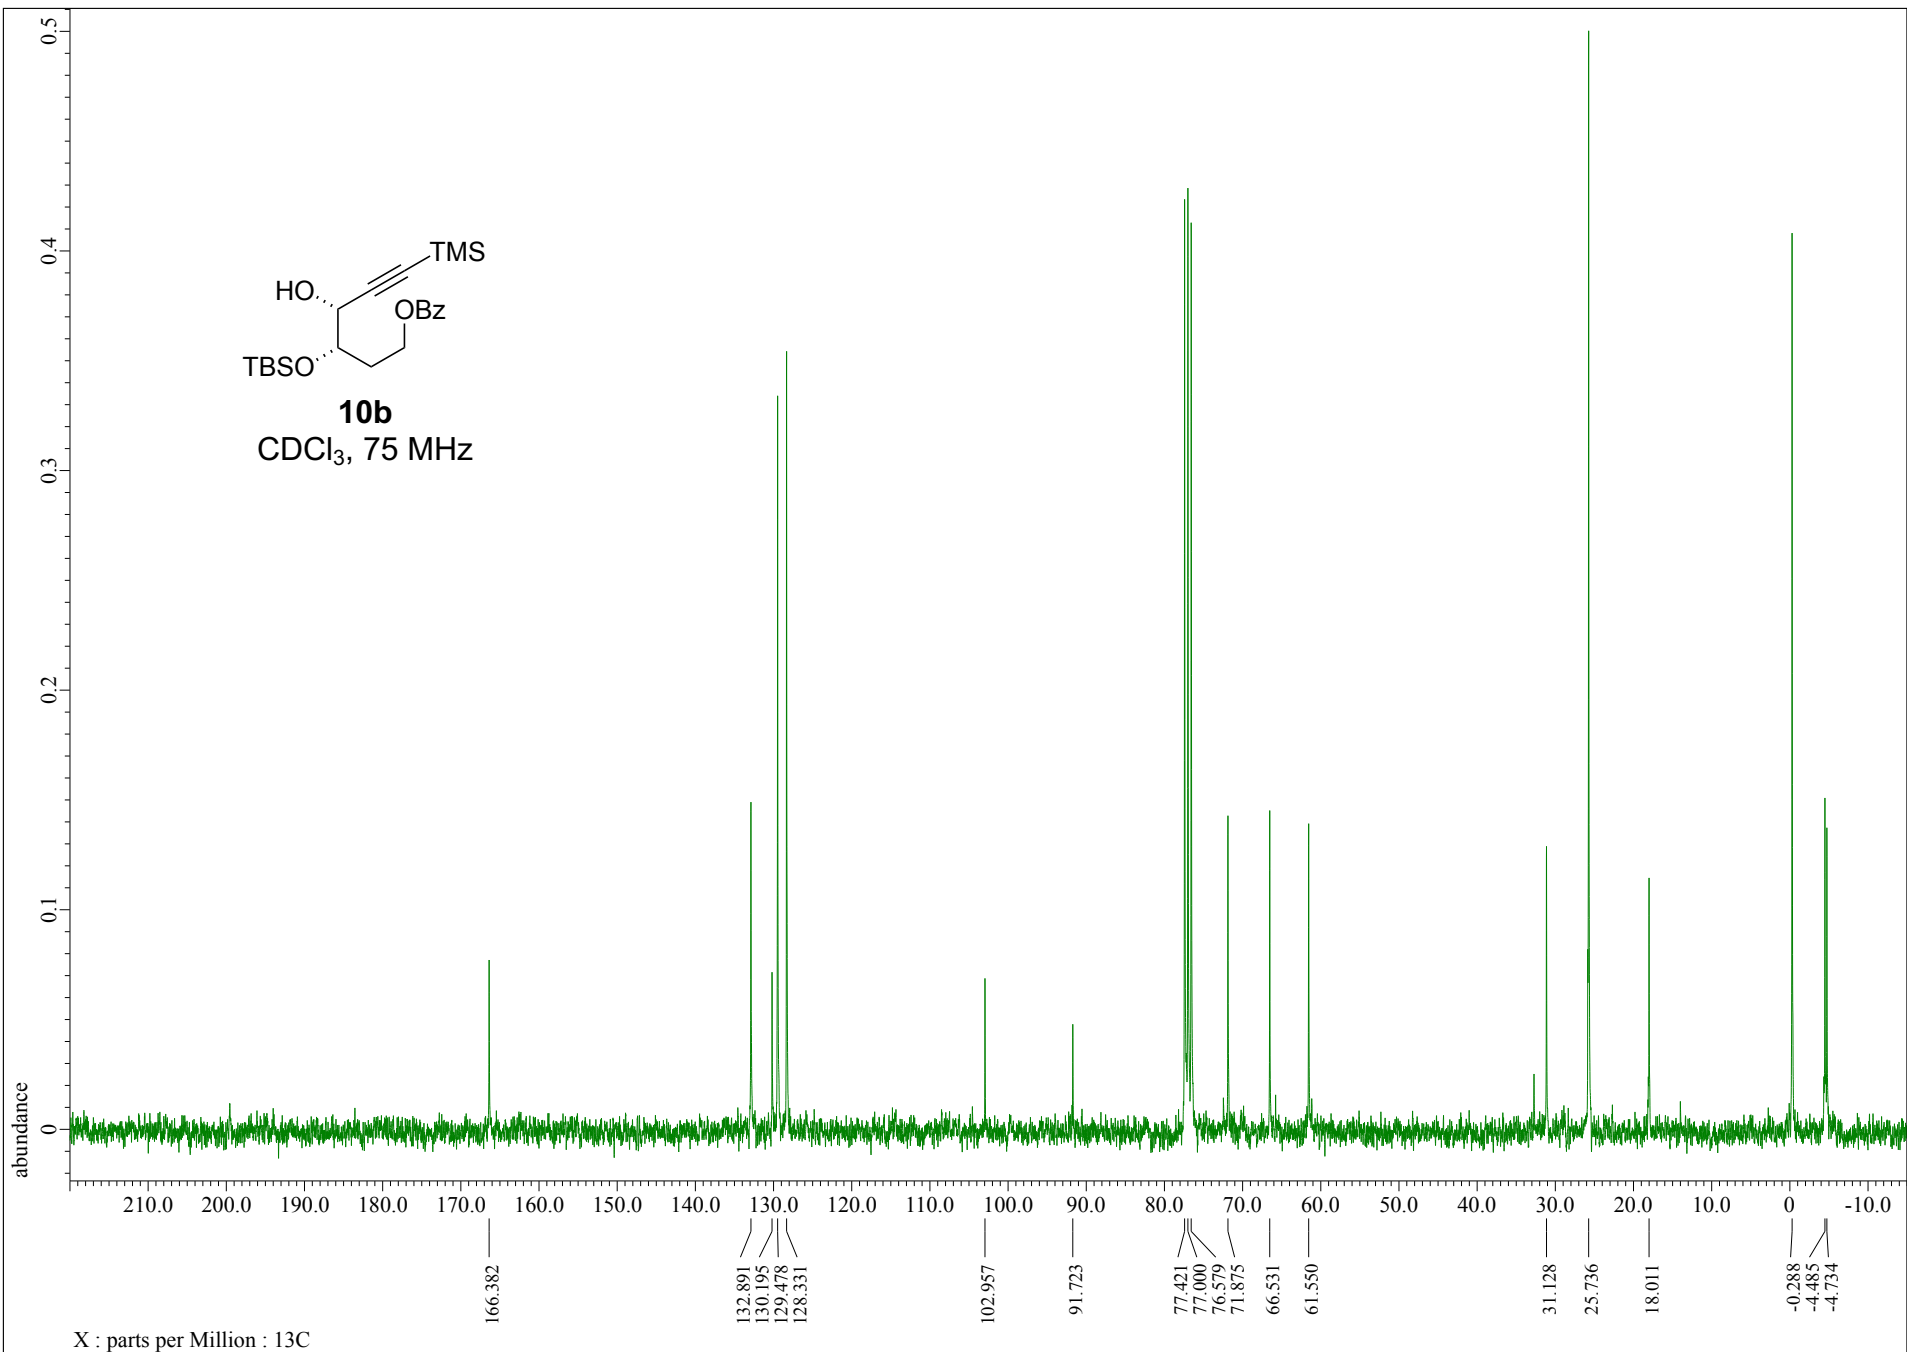

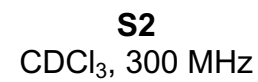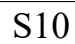

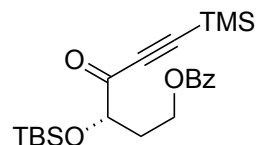

**S2**  
CDCl<sub>3</sub>, 75 MHz

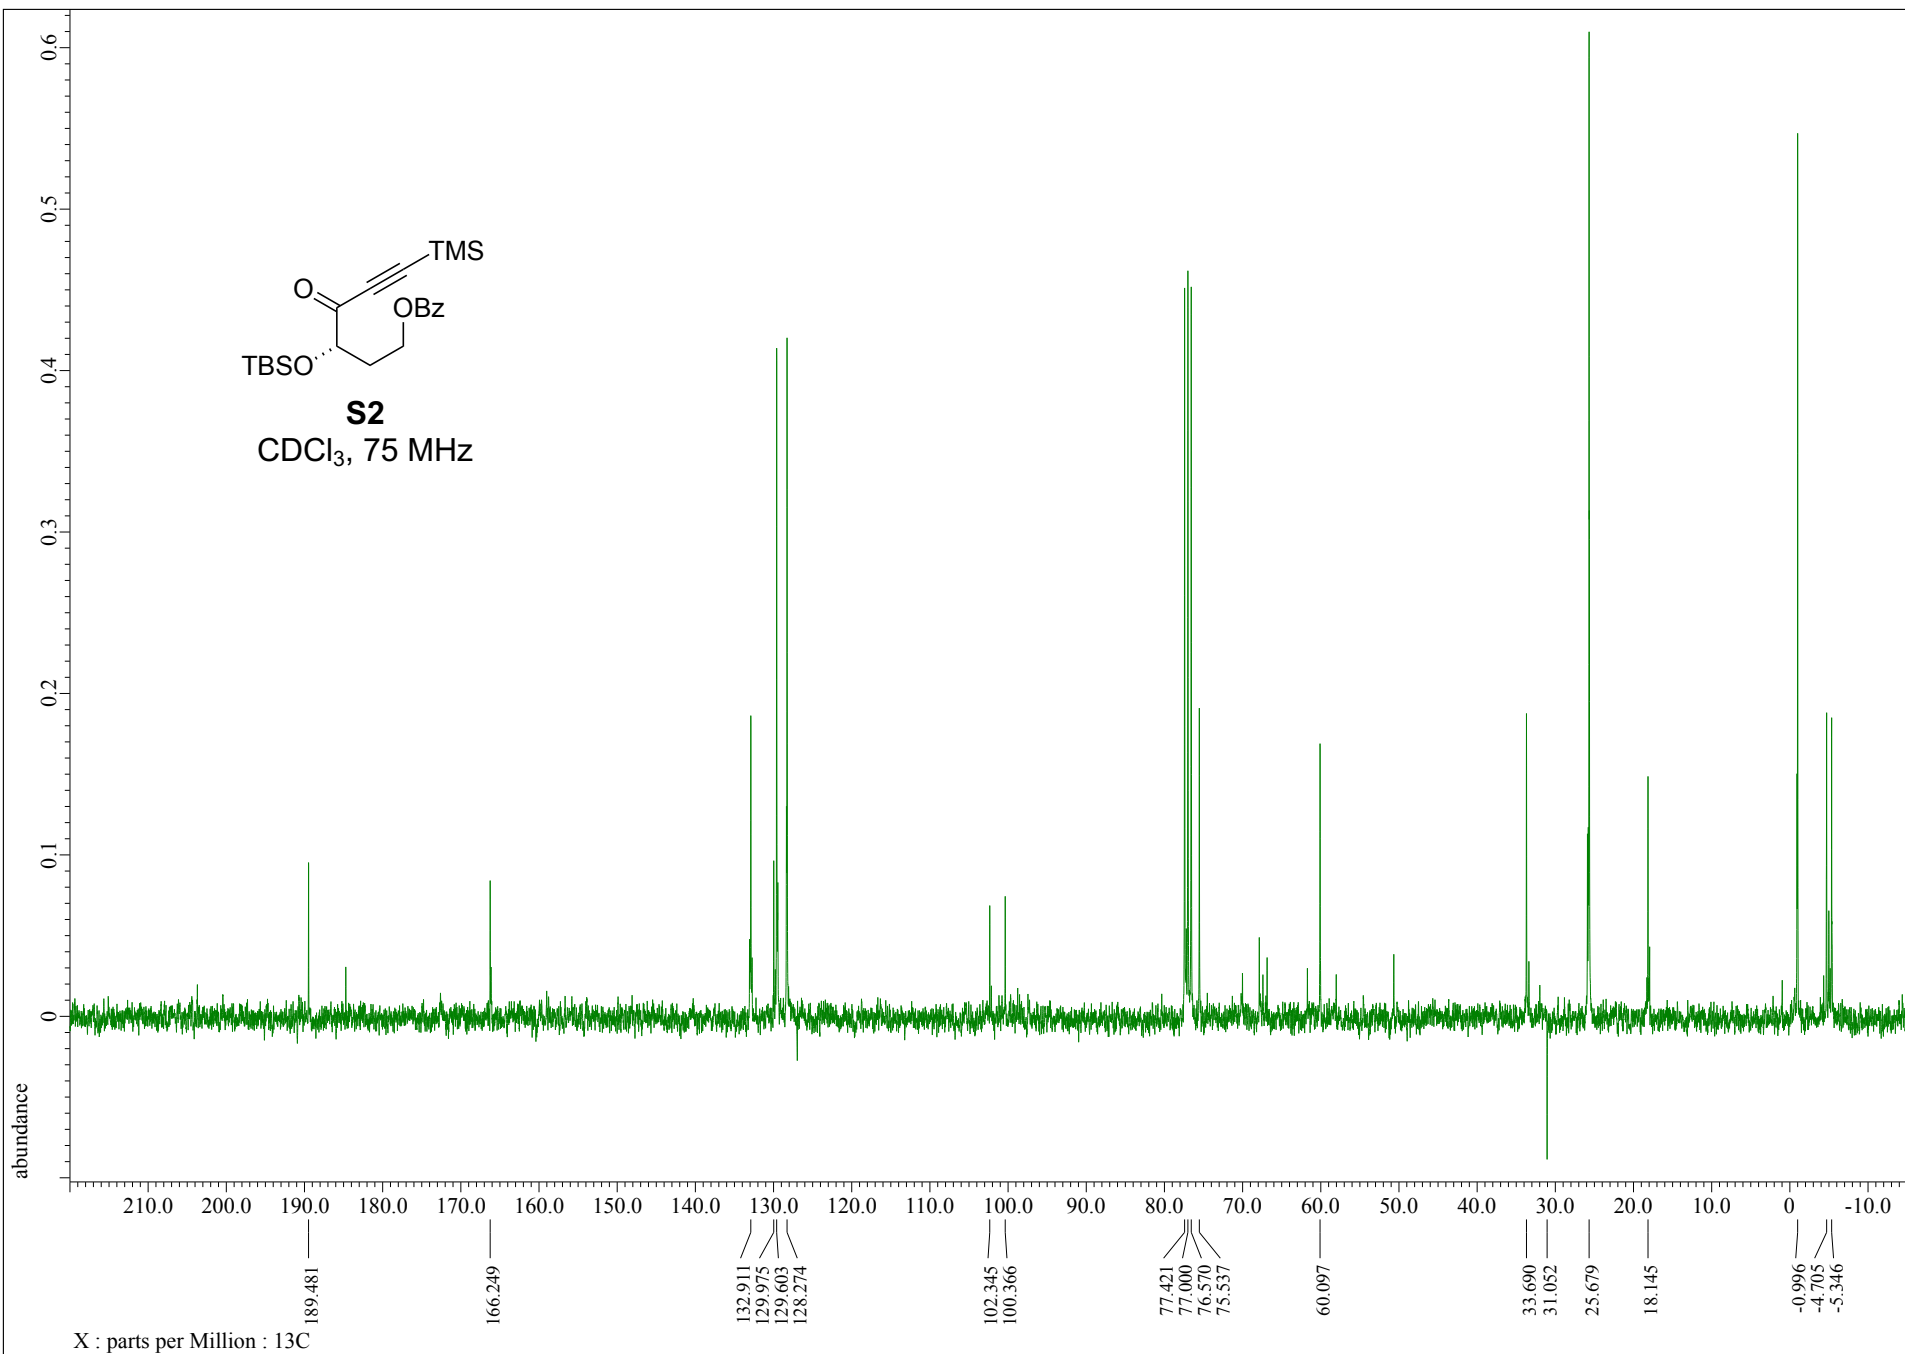

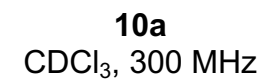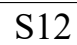



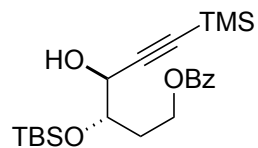

**10a**  
CDCl<sub>3</sub>, 75 MHz

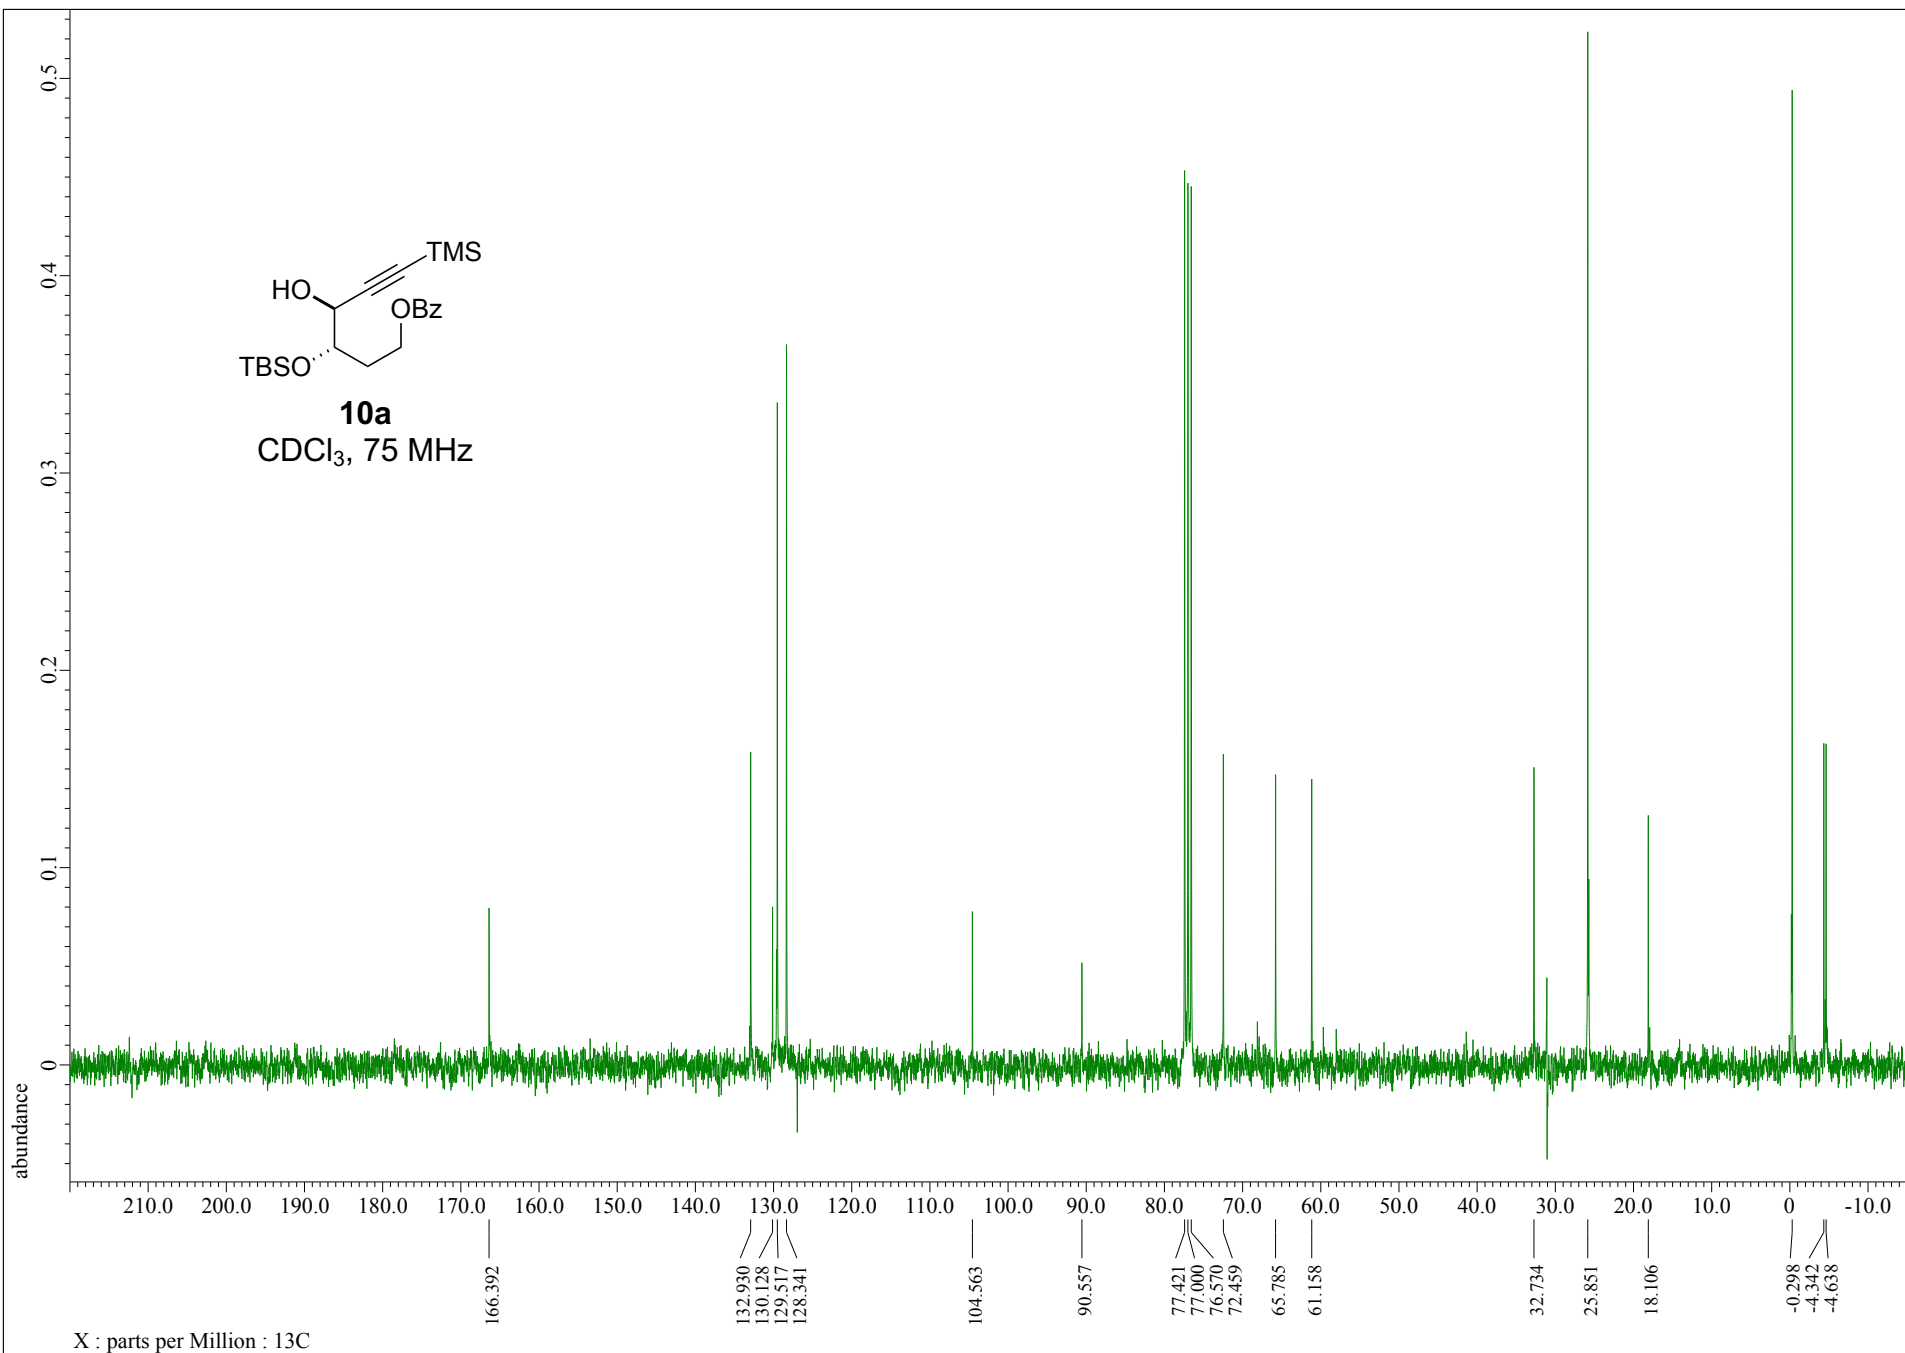

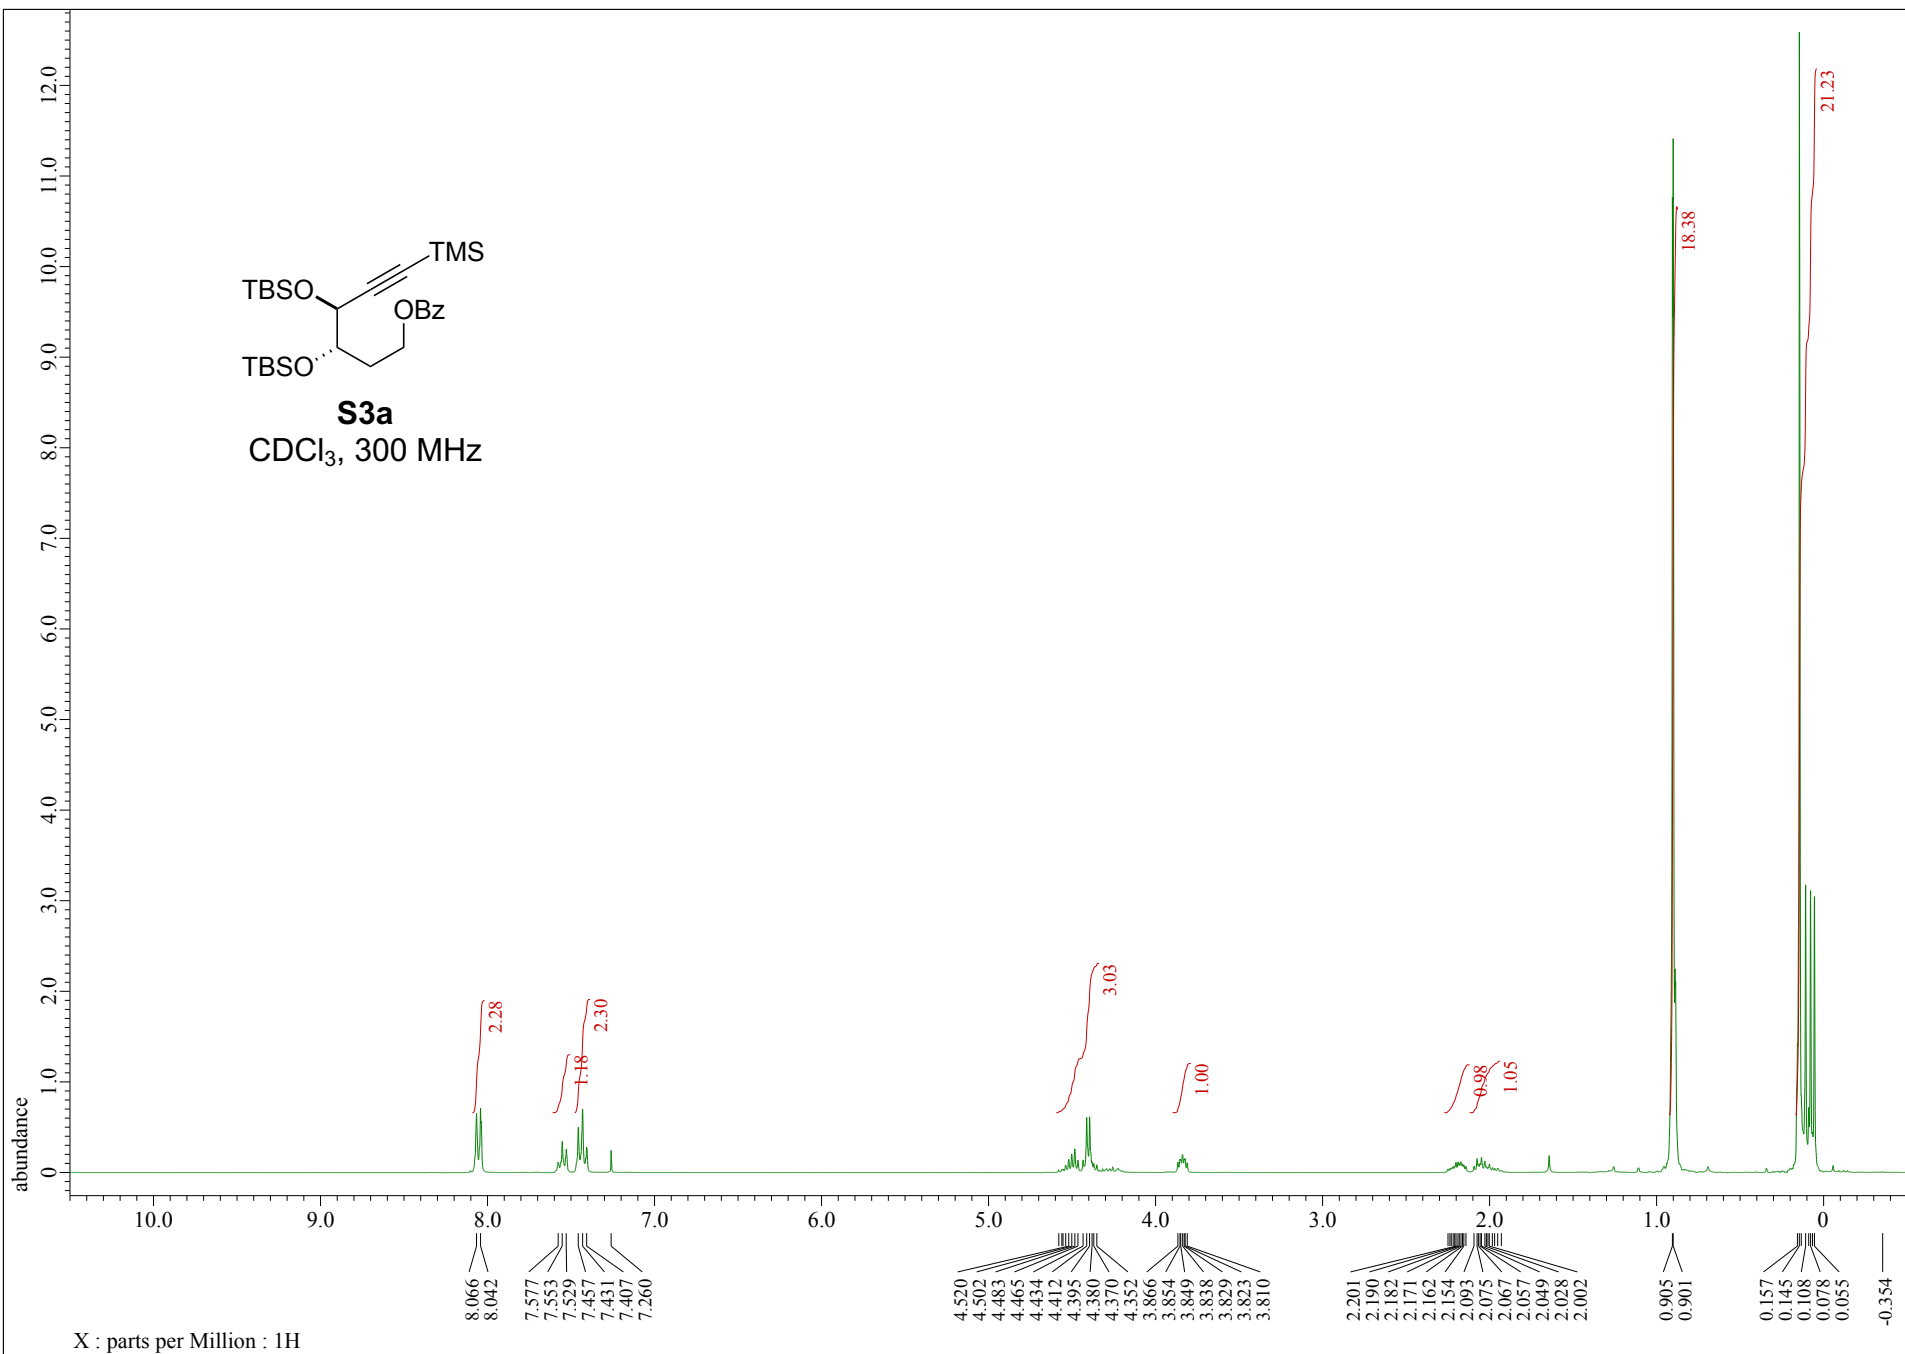

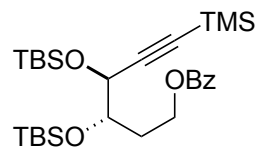

**S3a**  
CDCl<sub>3</sub>, 75 MHz

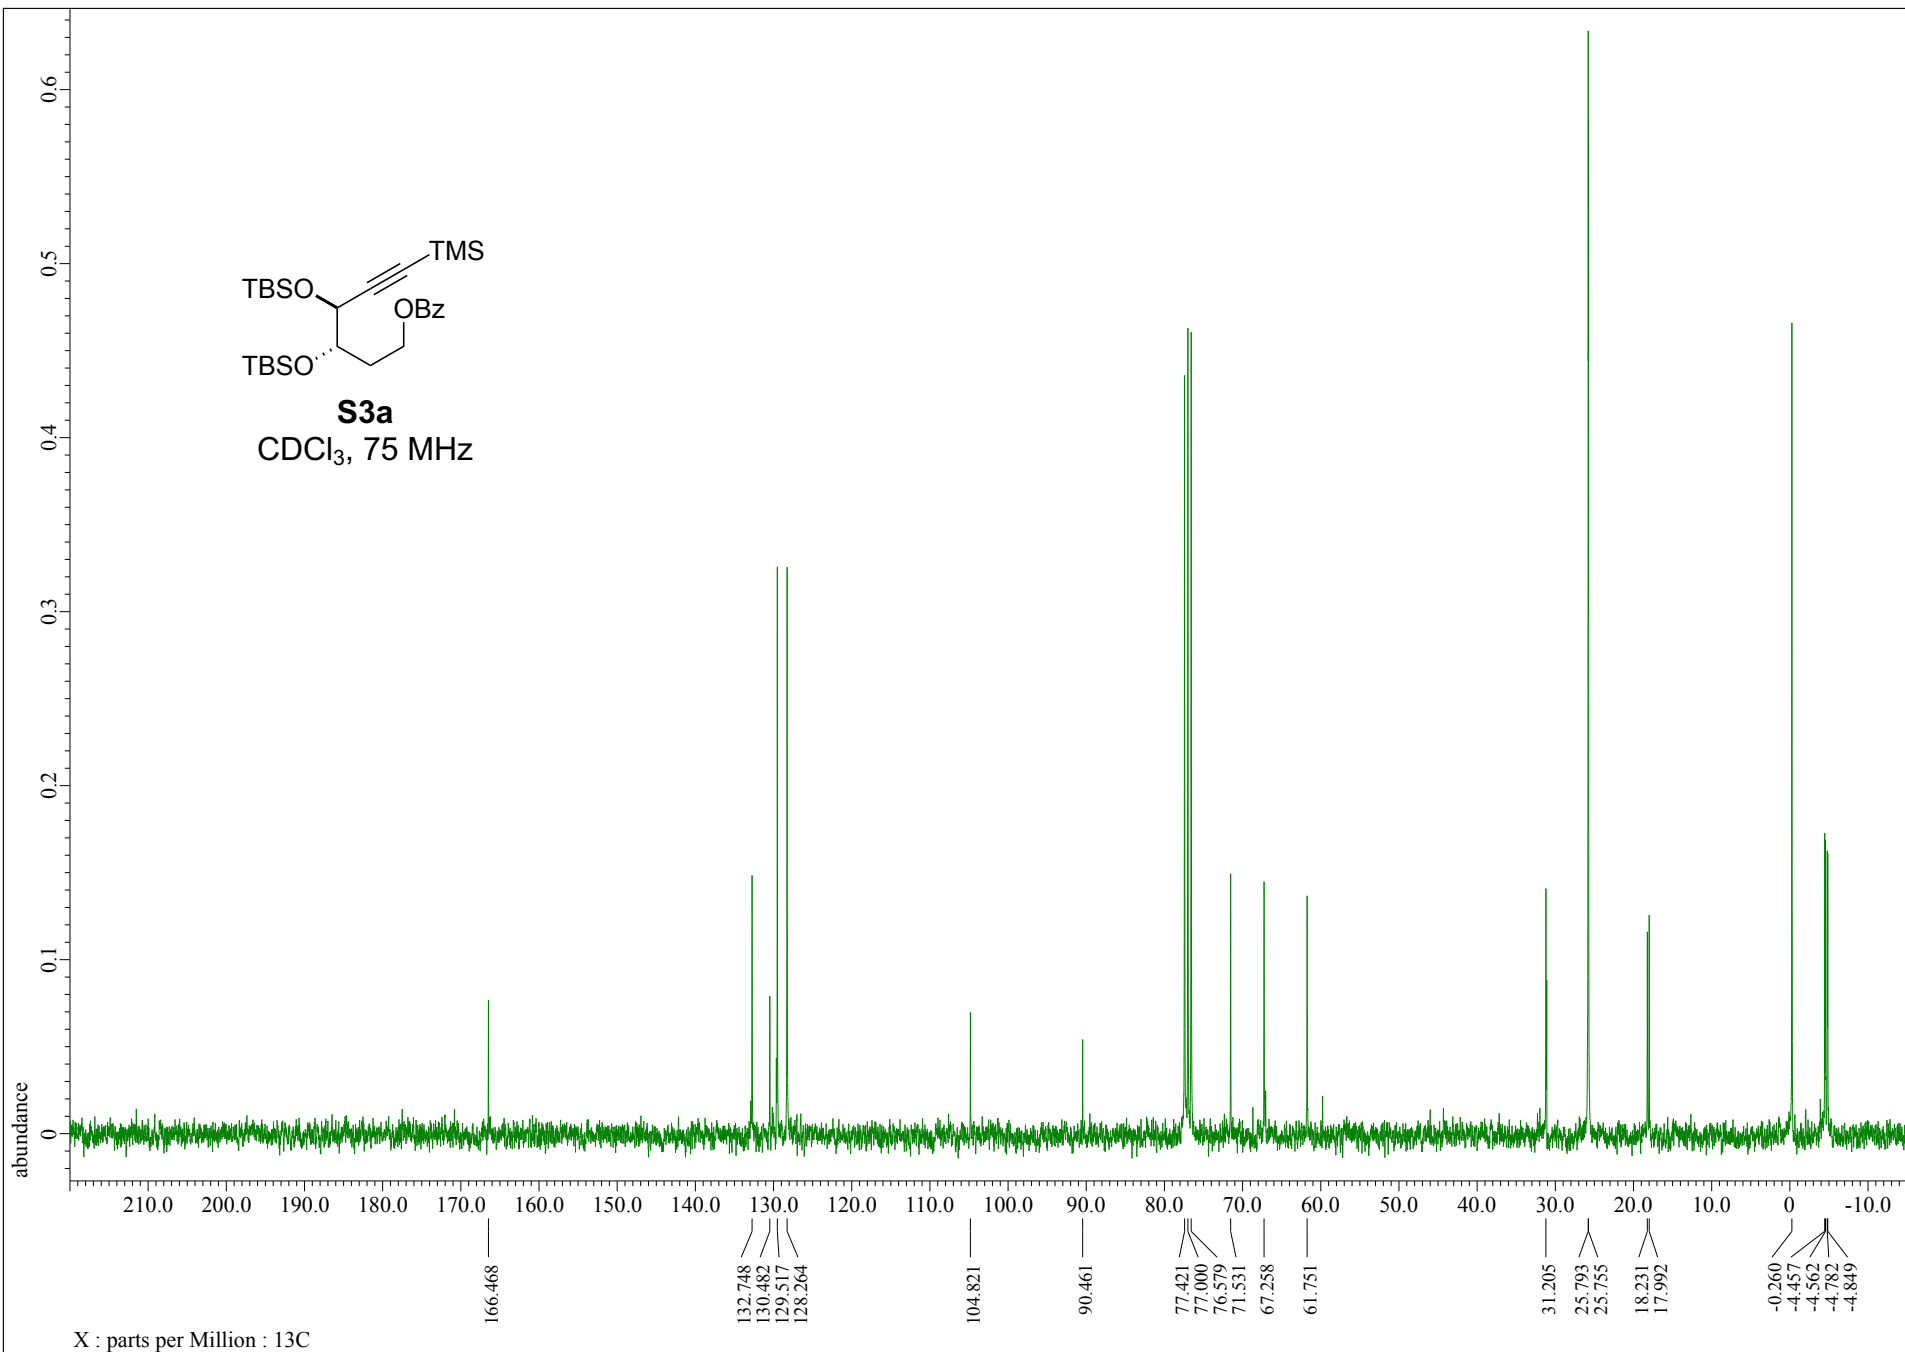

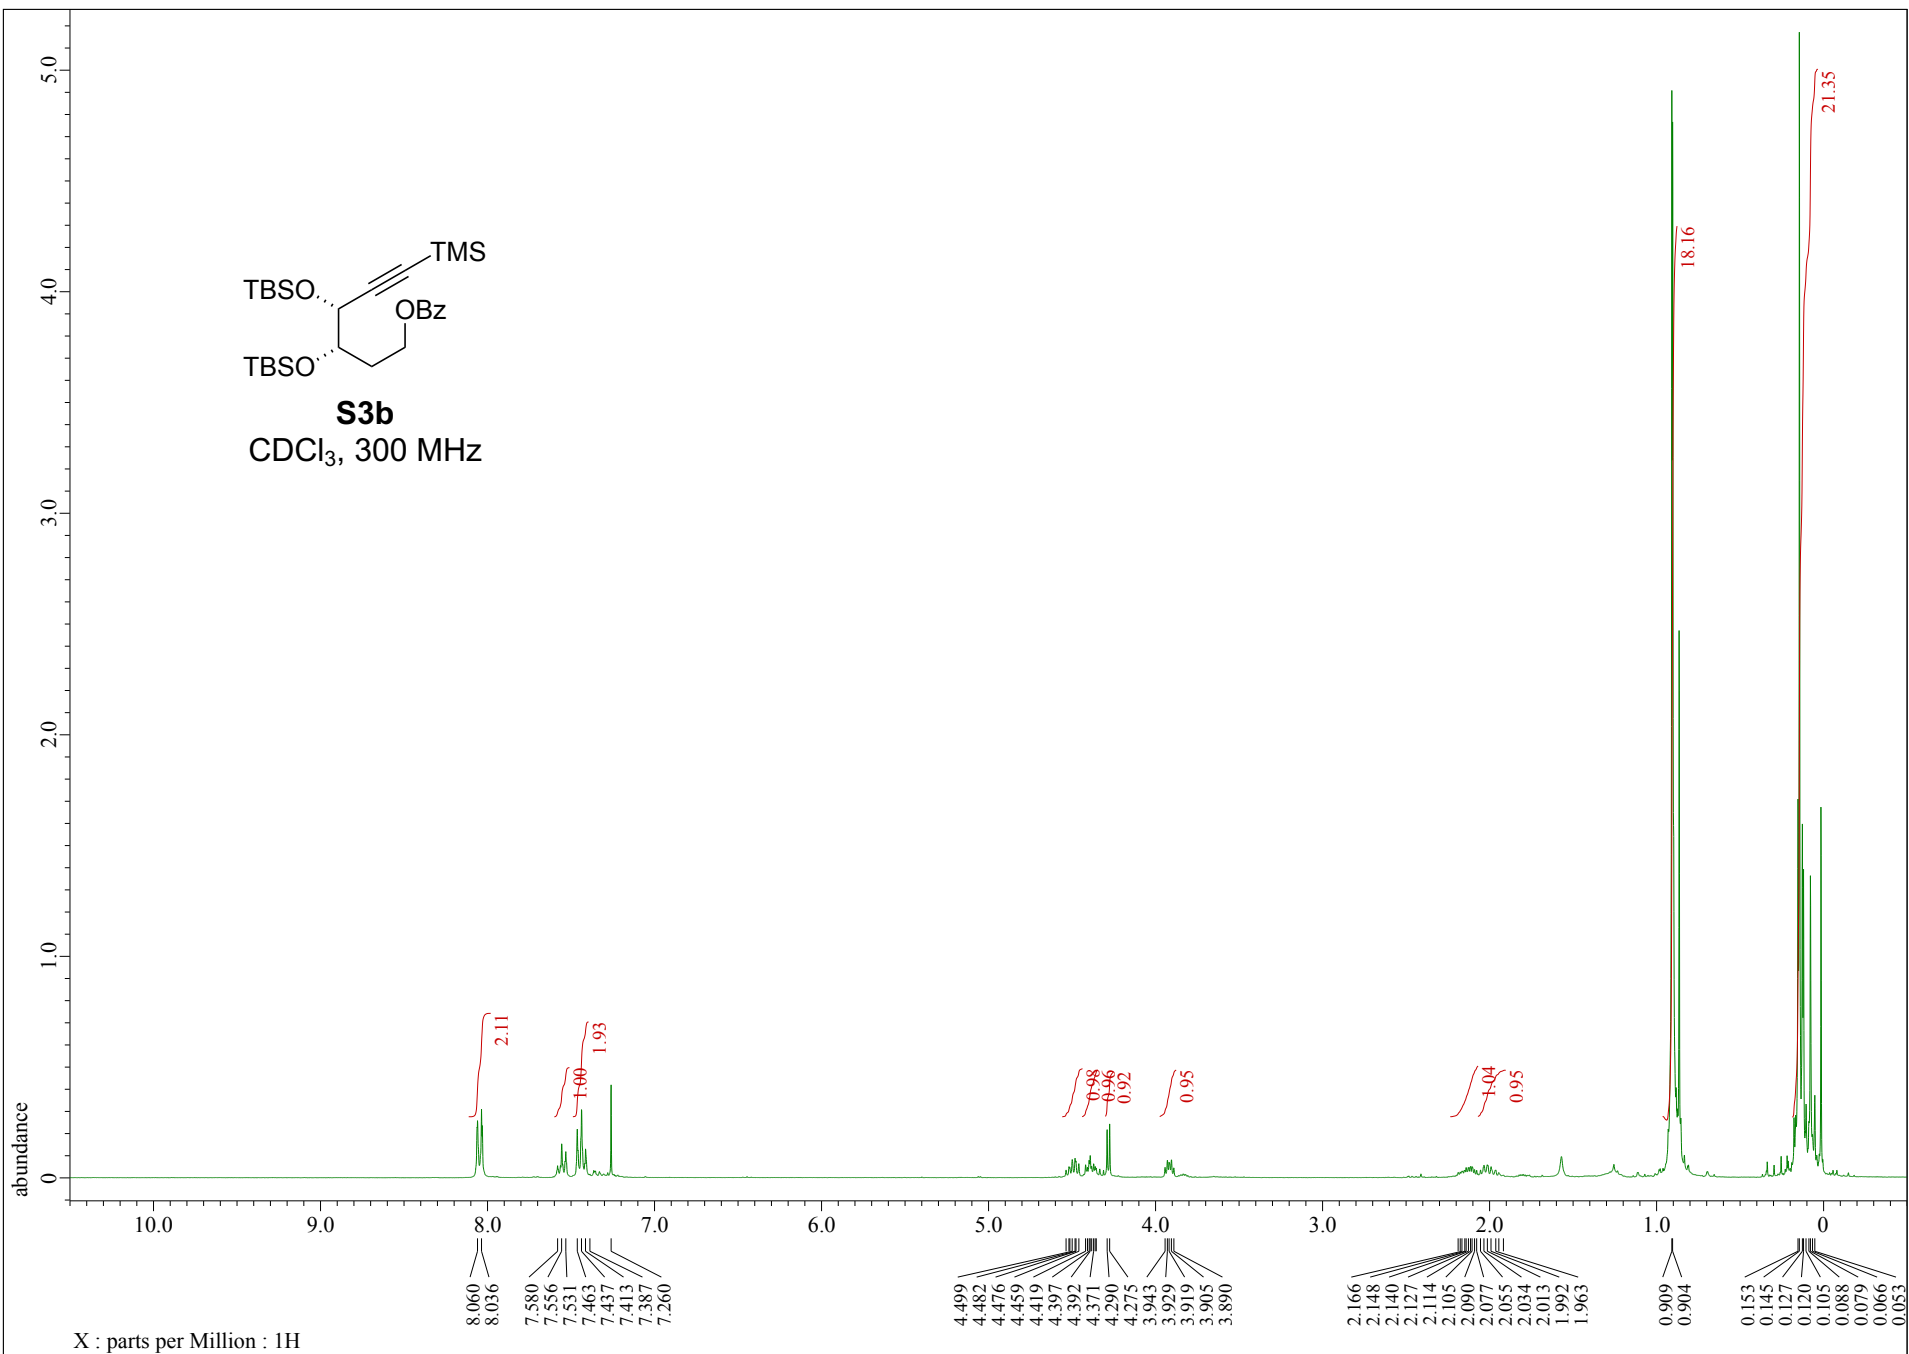

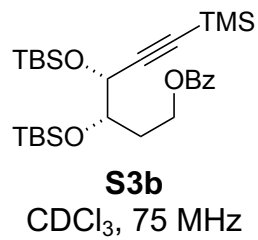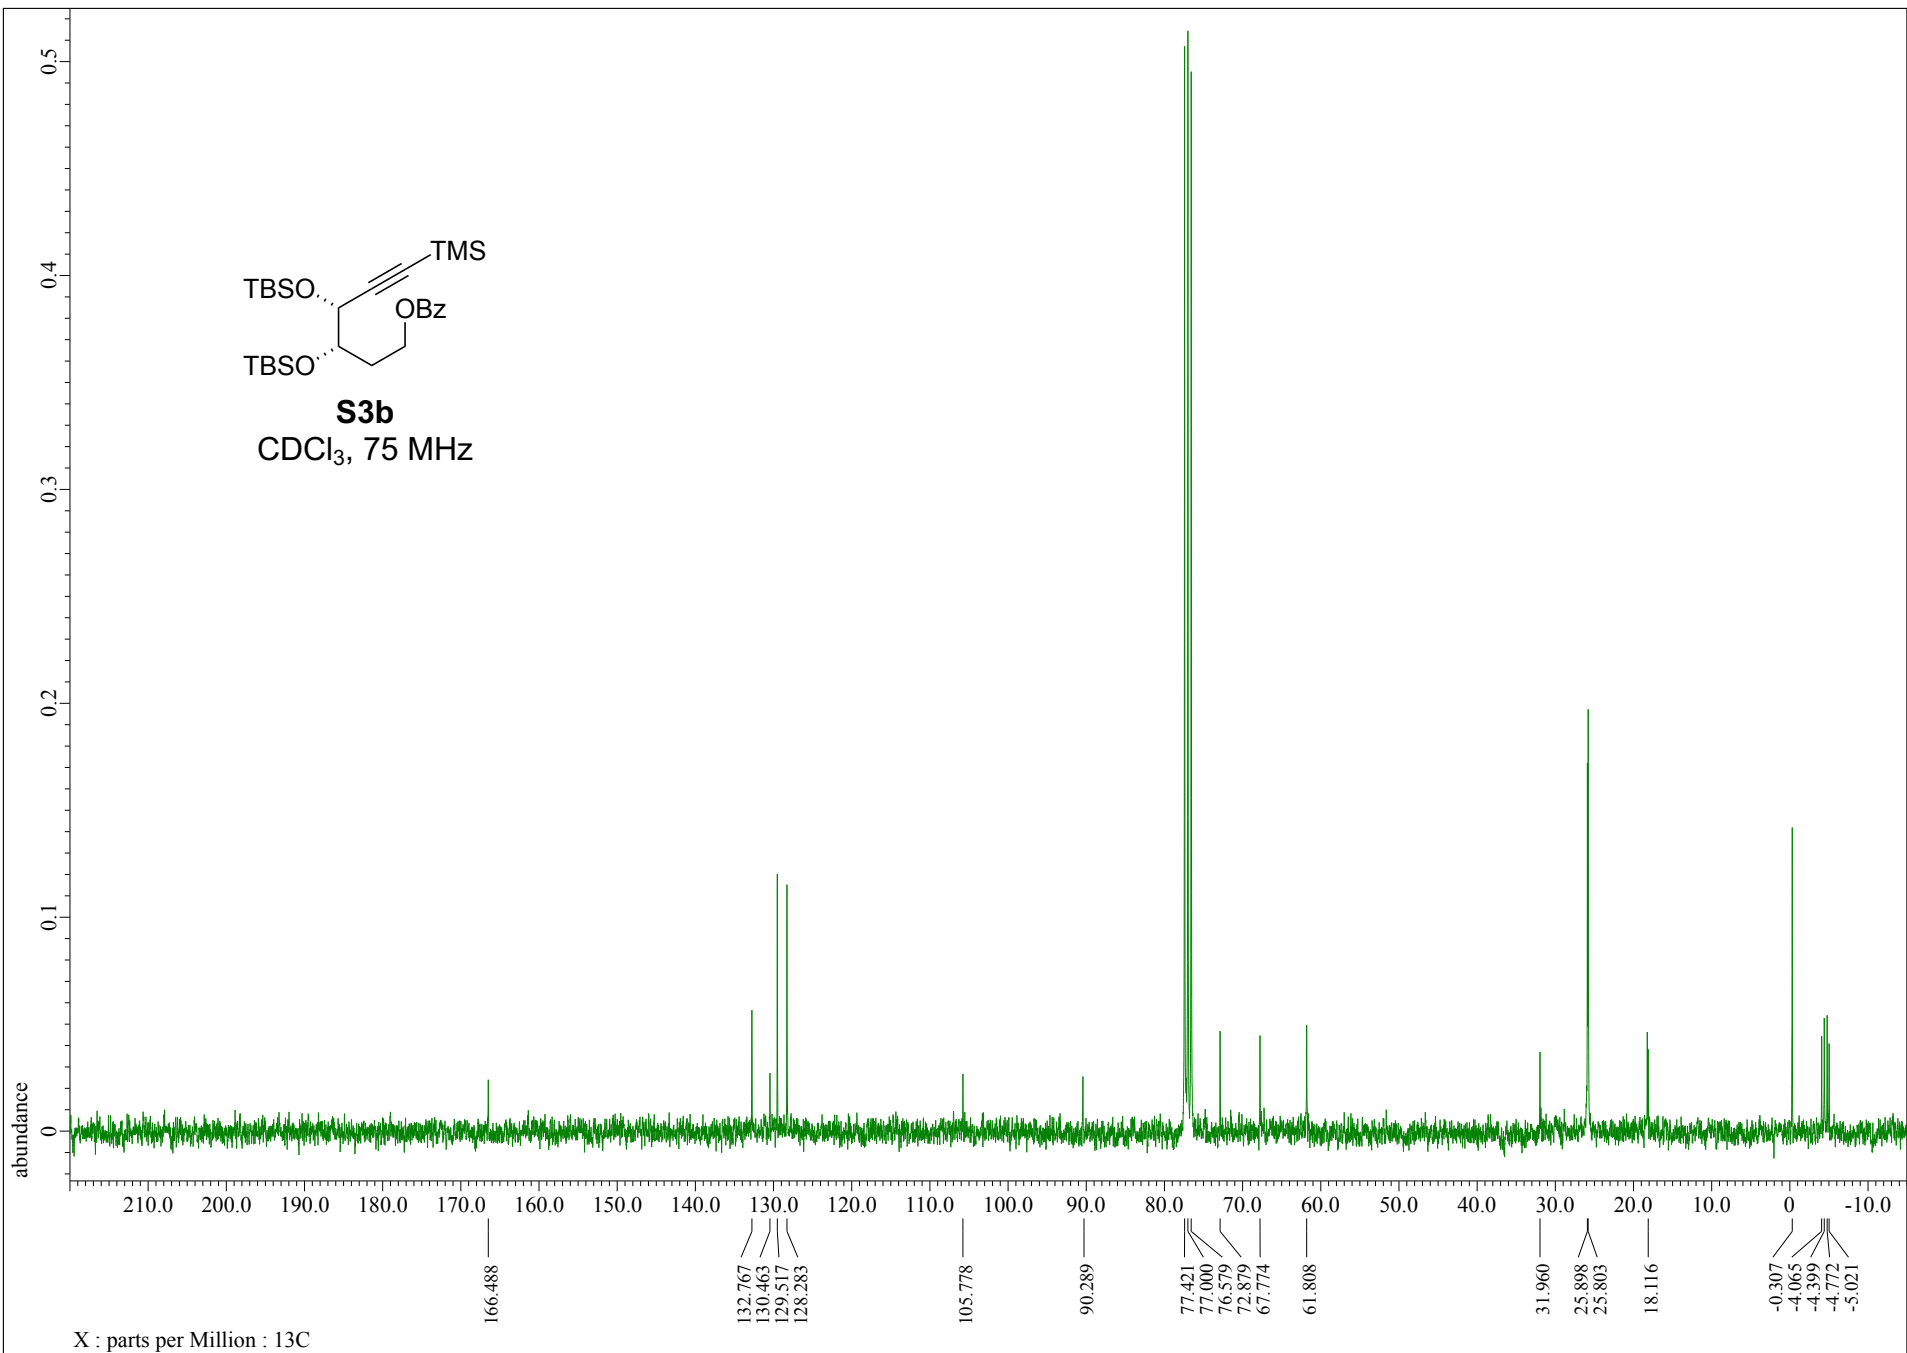

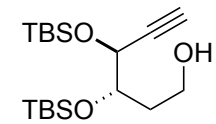

CDCl<sub>3</sub>, 300 MHz

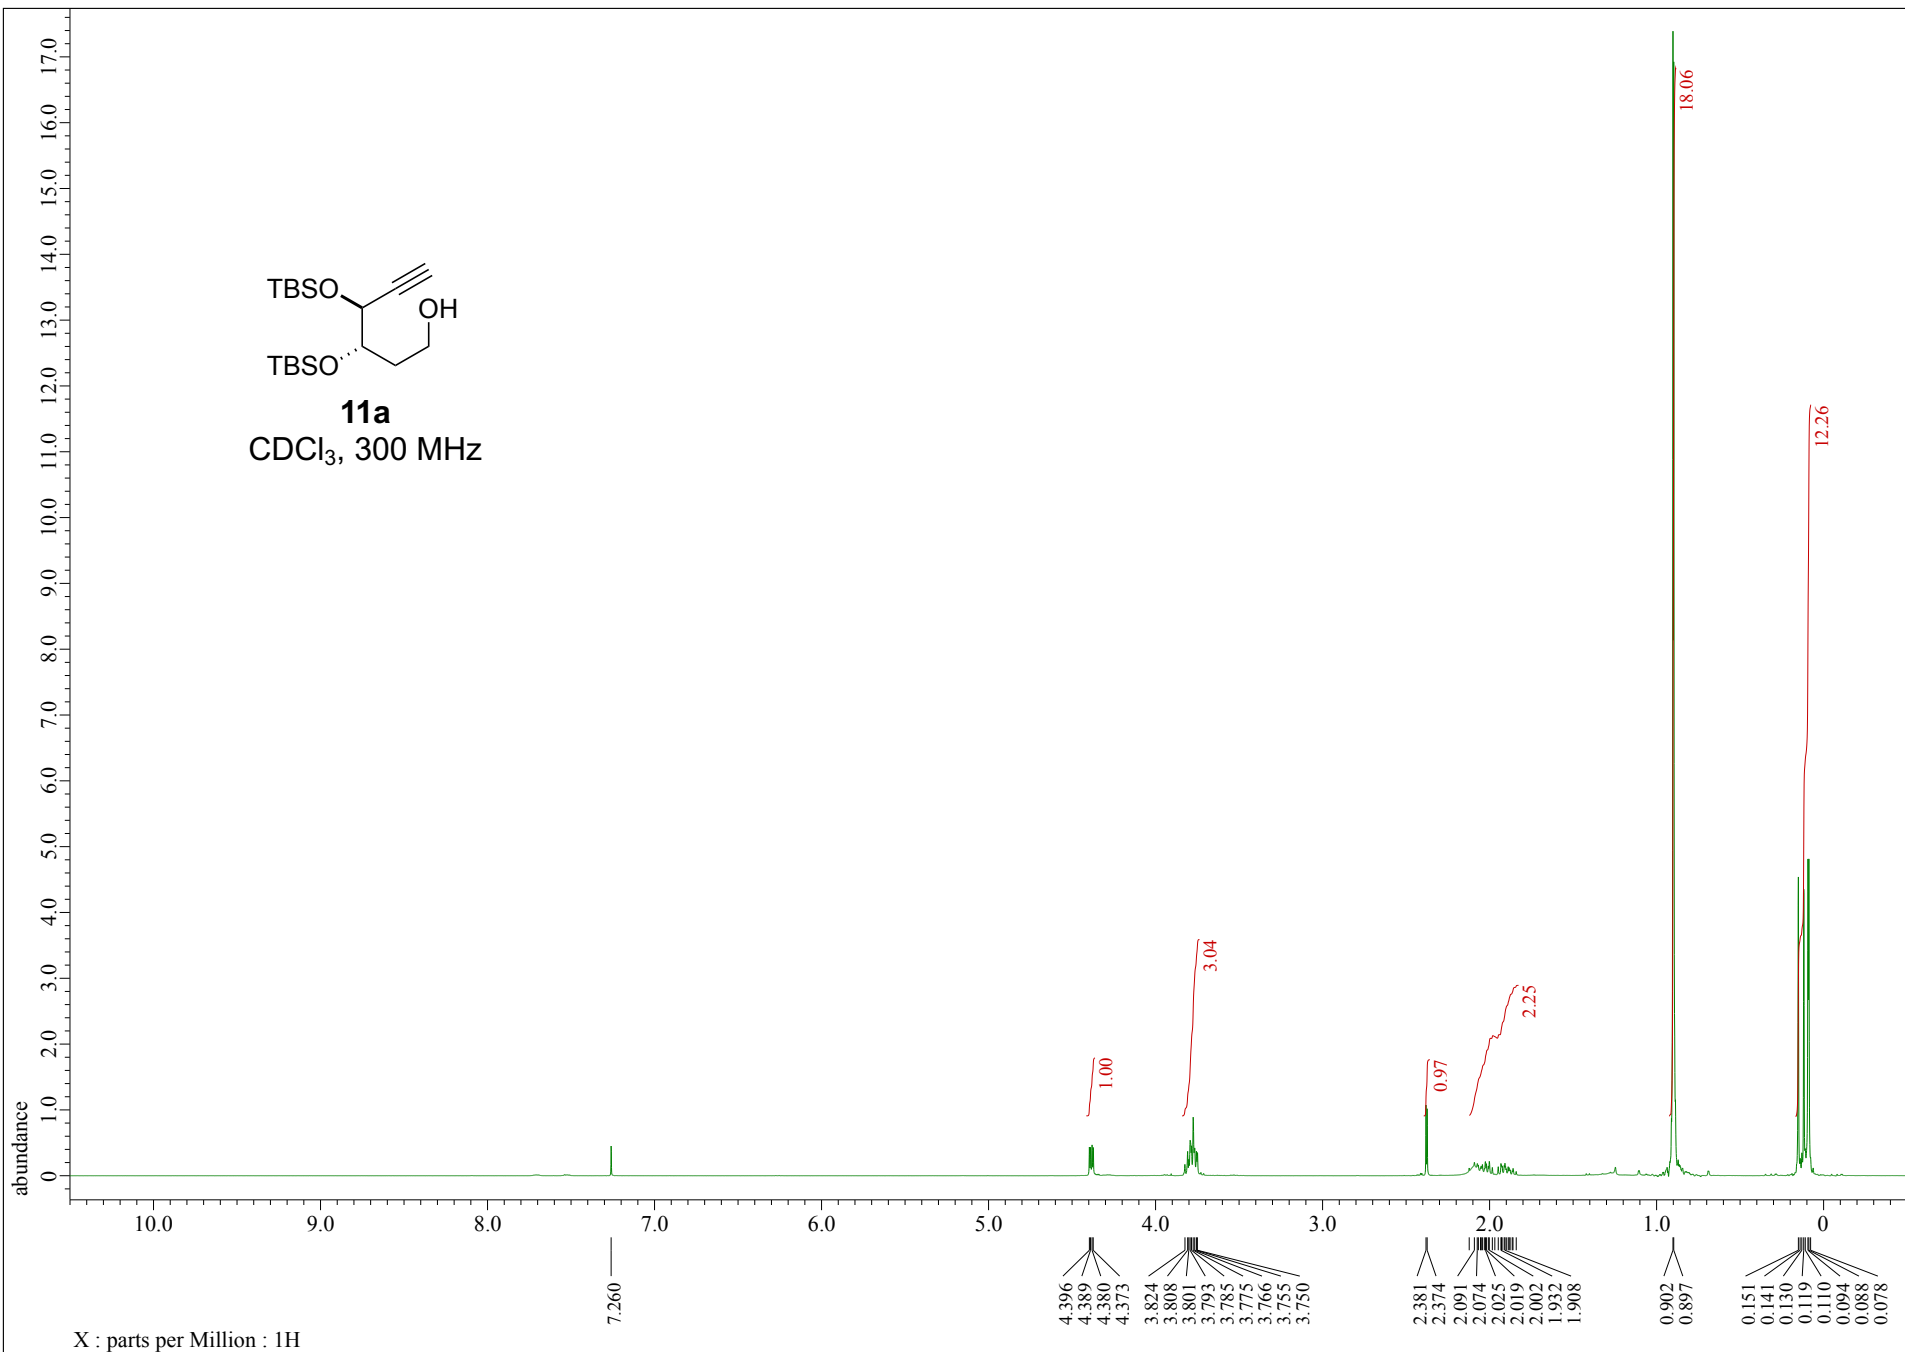

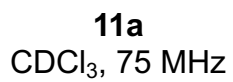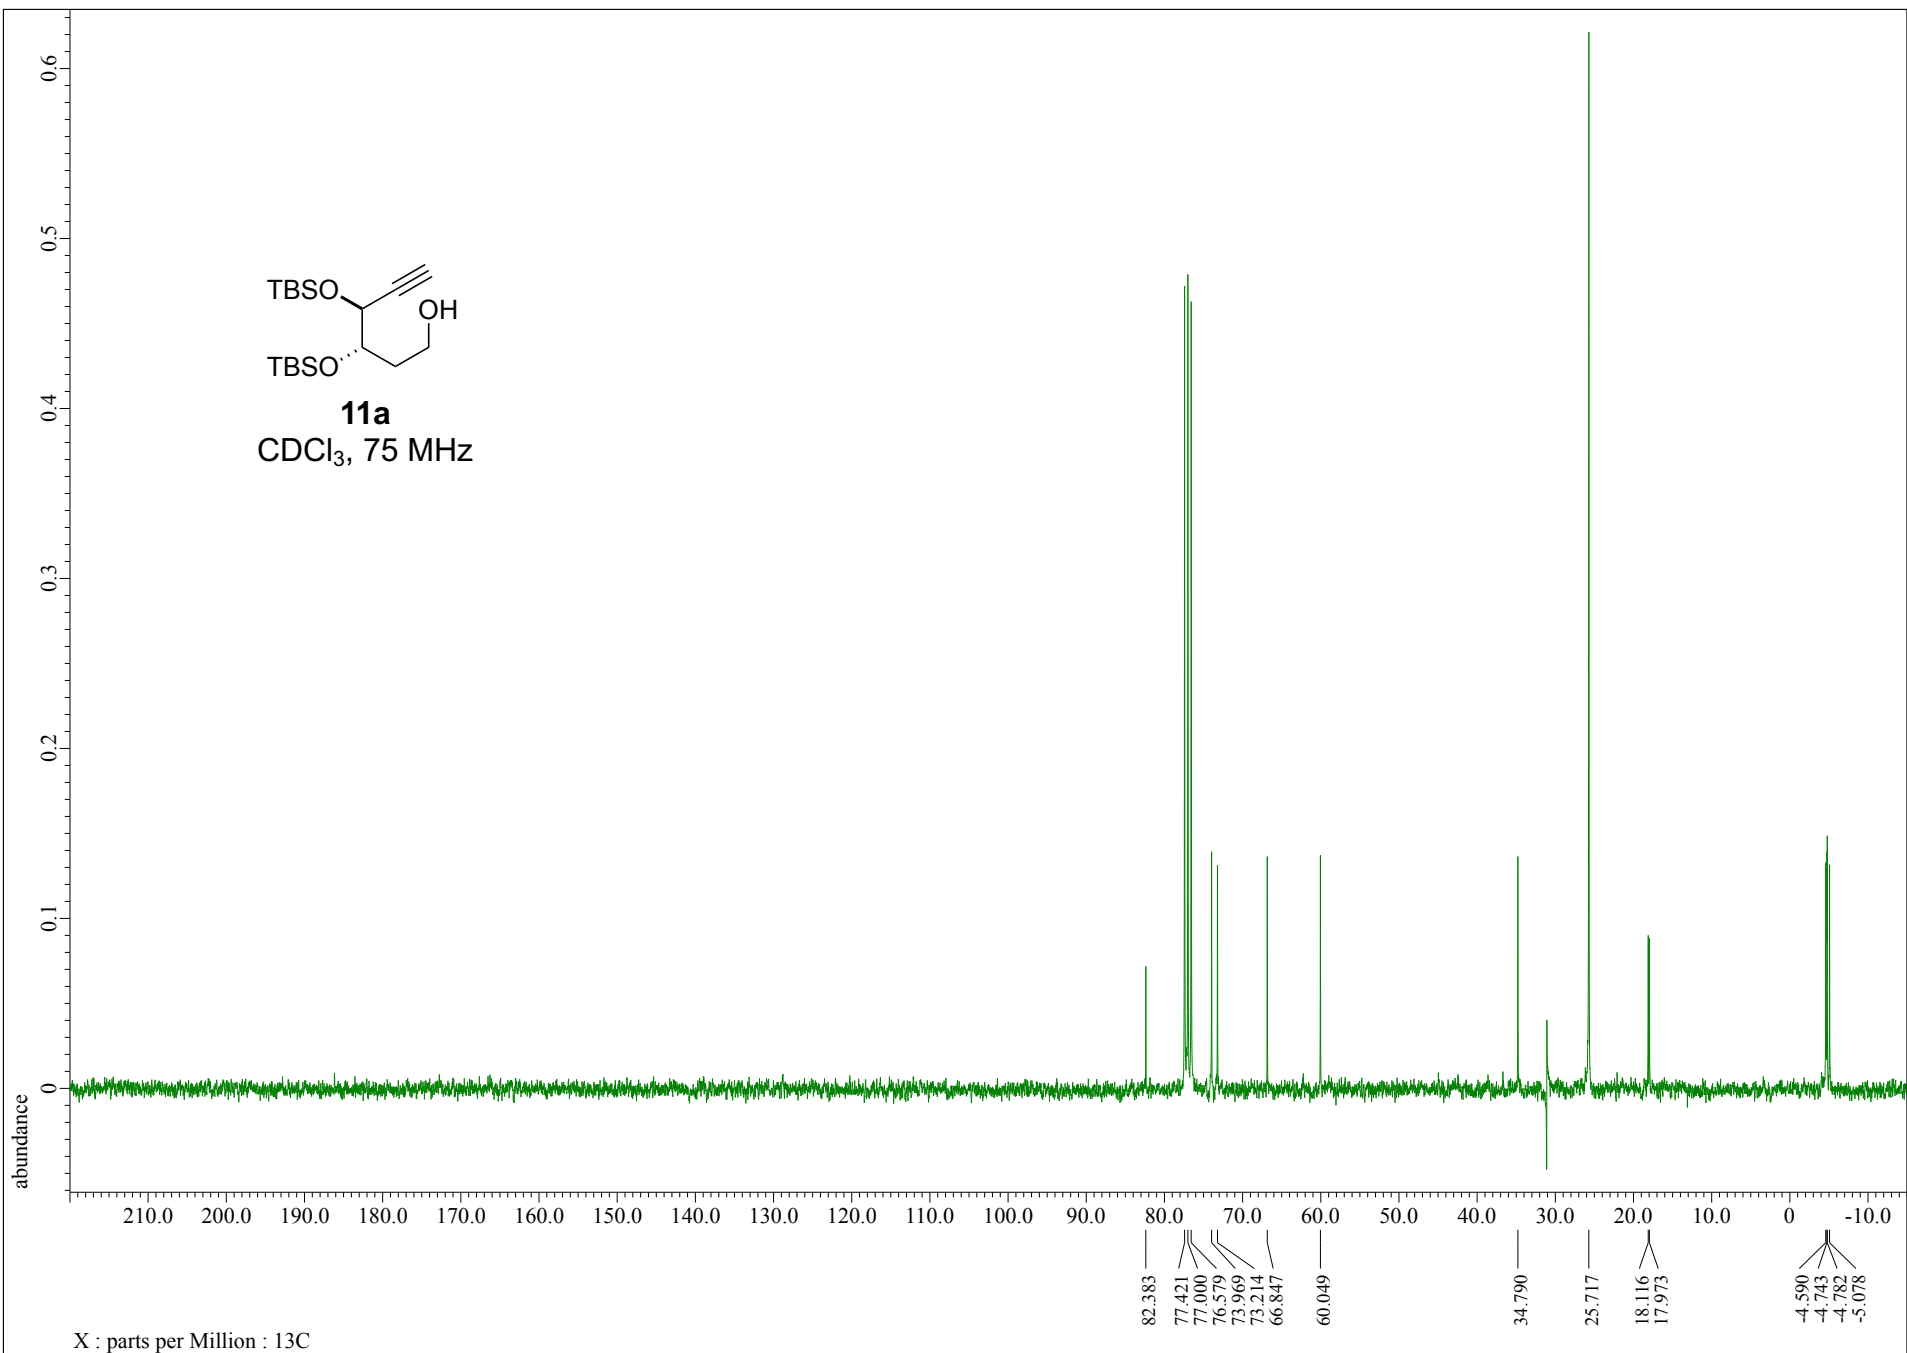

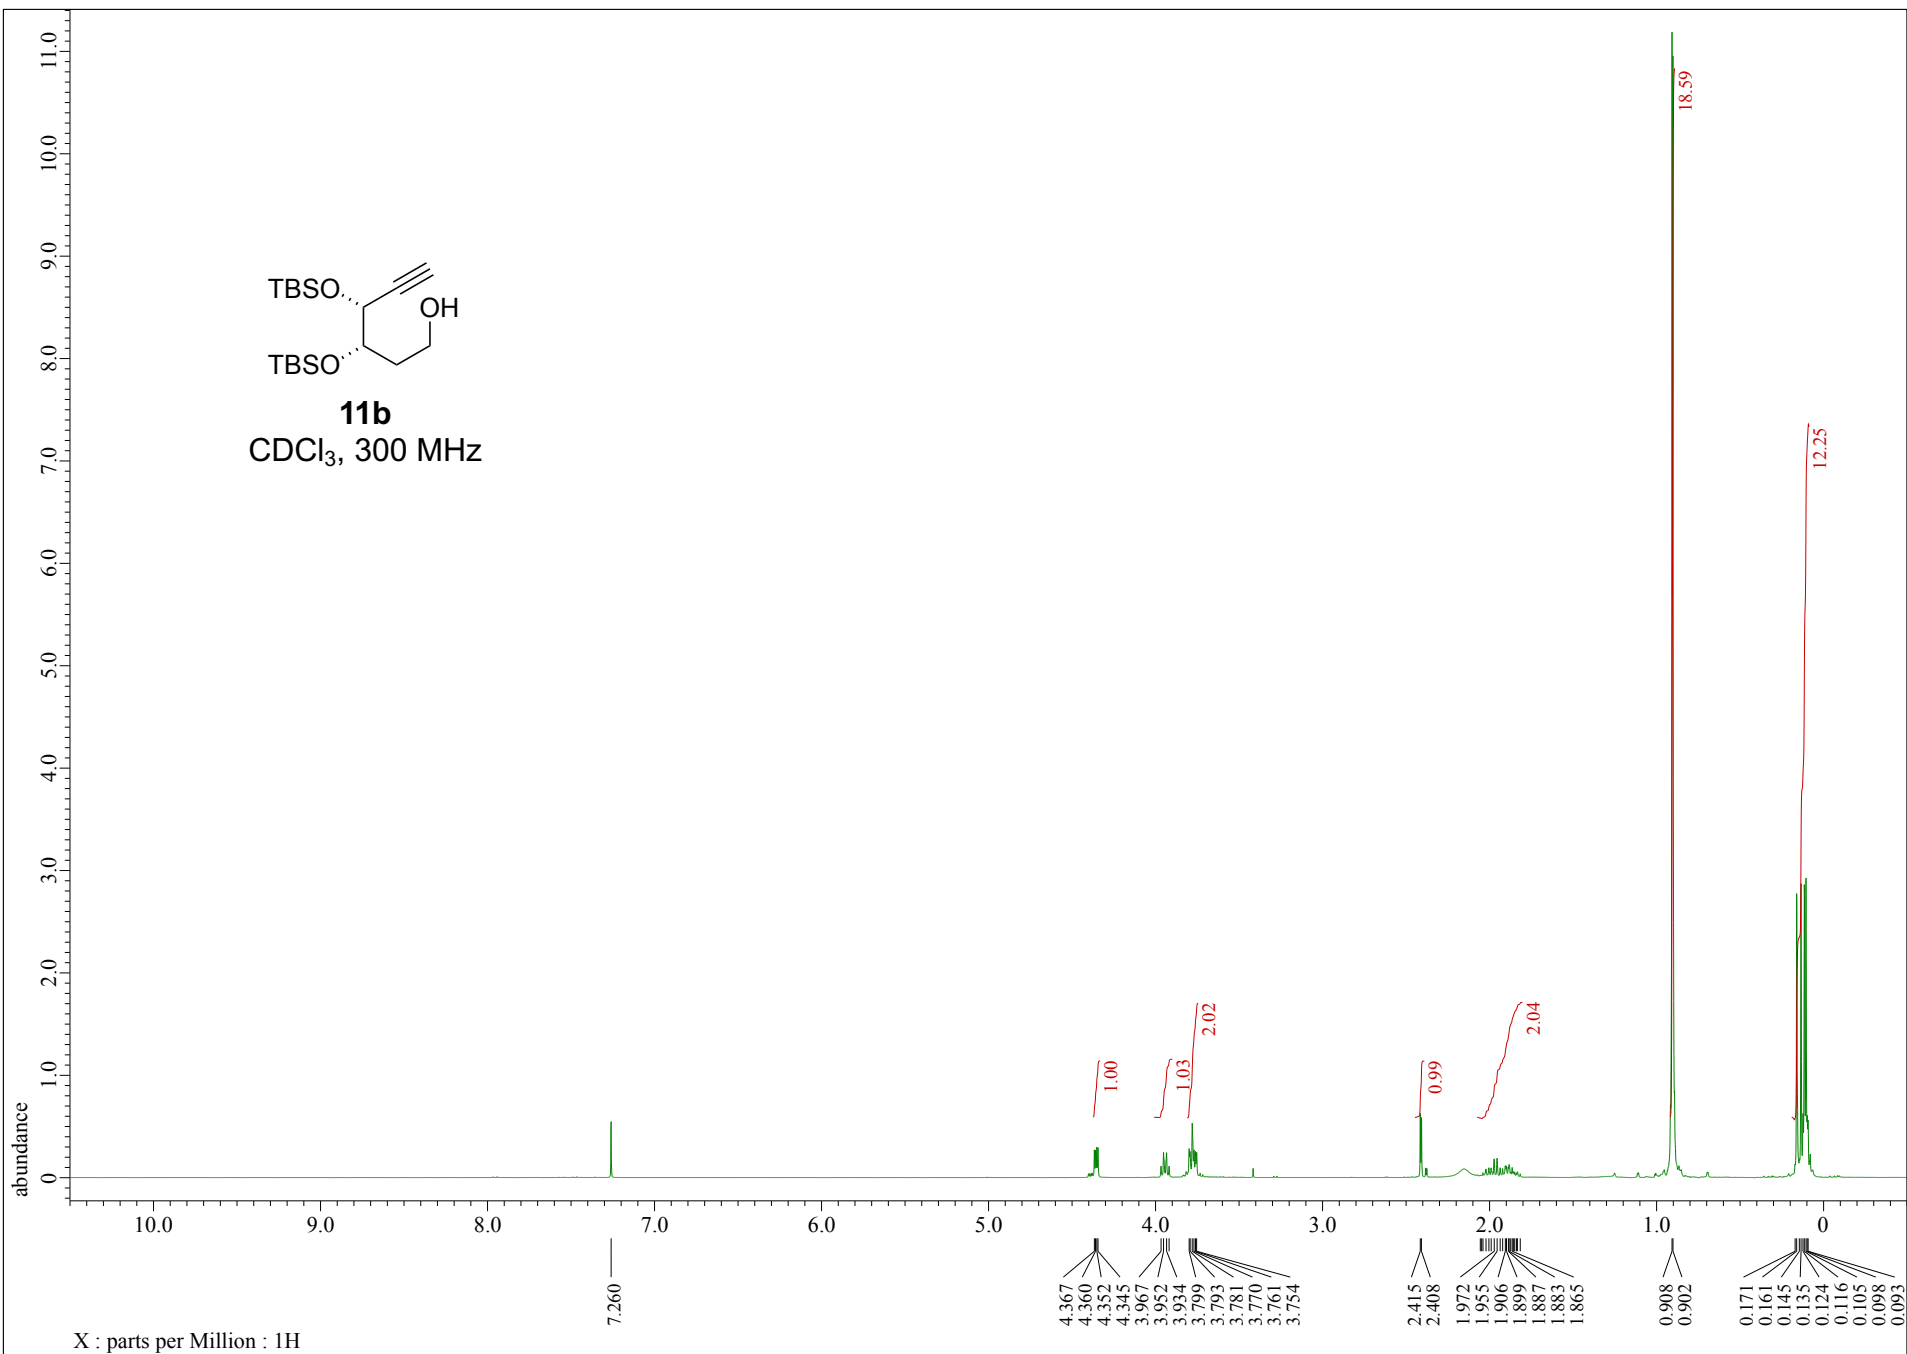



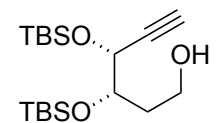

**11b**  
CDCl<sub>3</sub>, 75 MHz

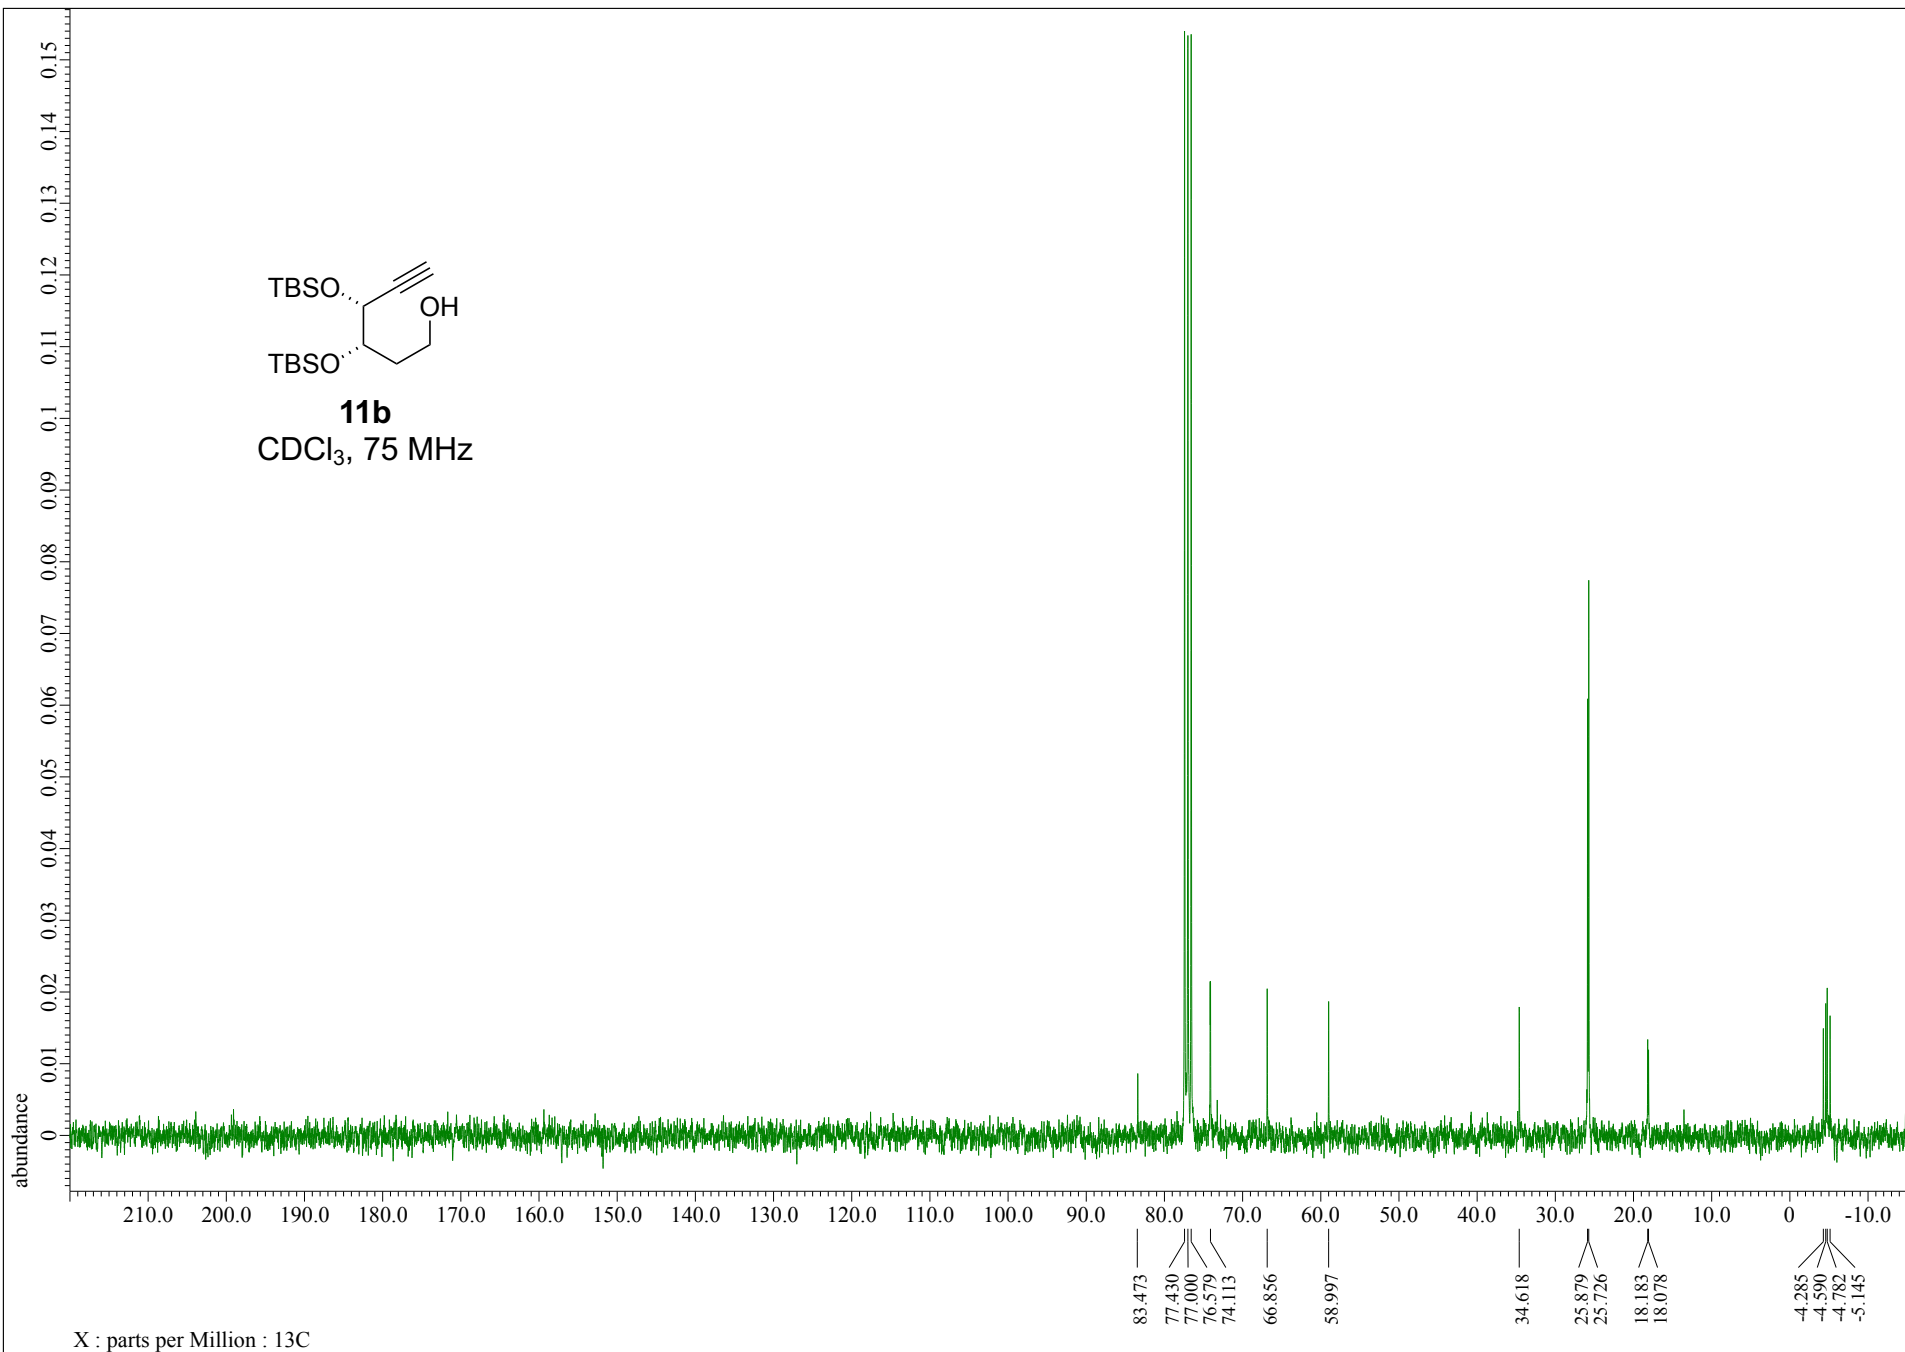

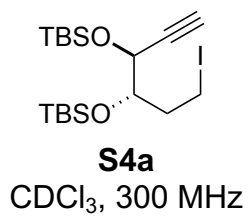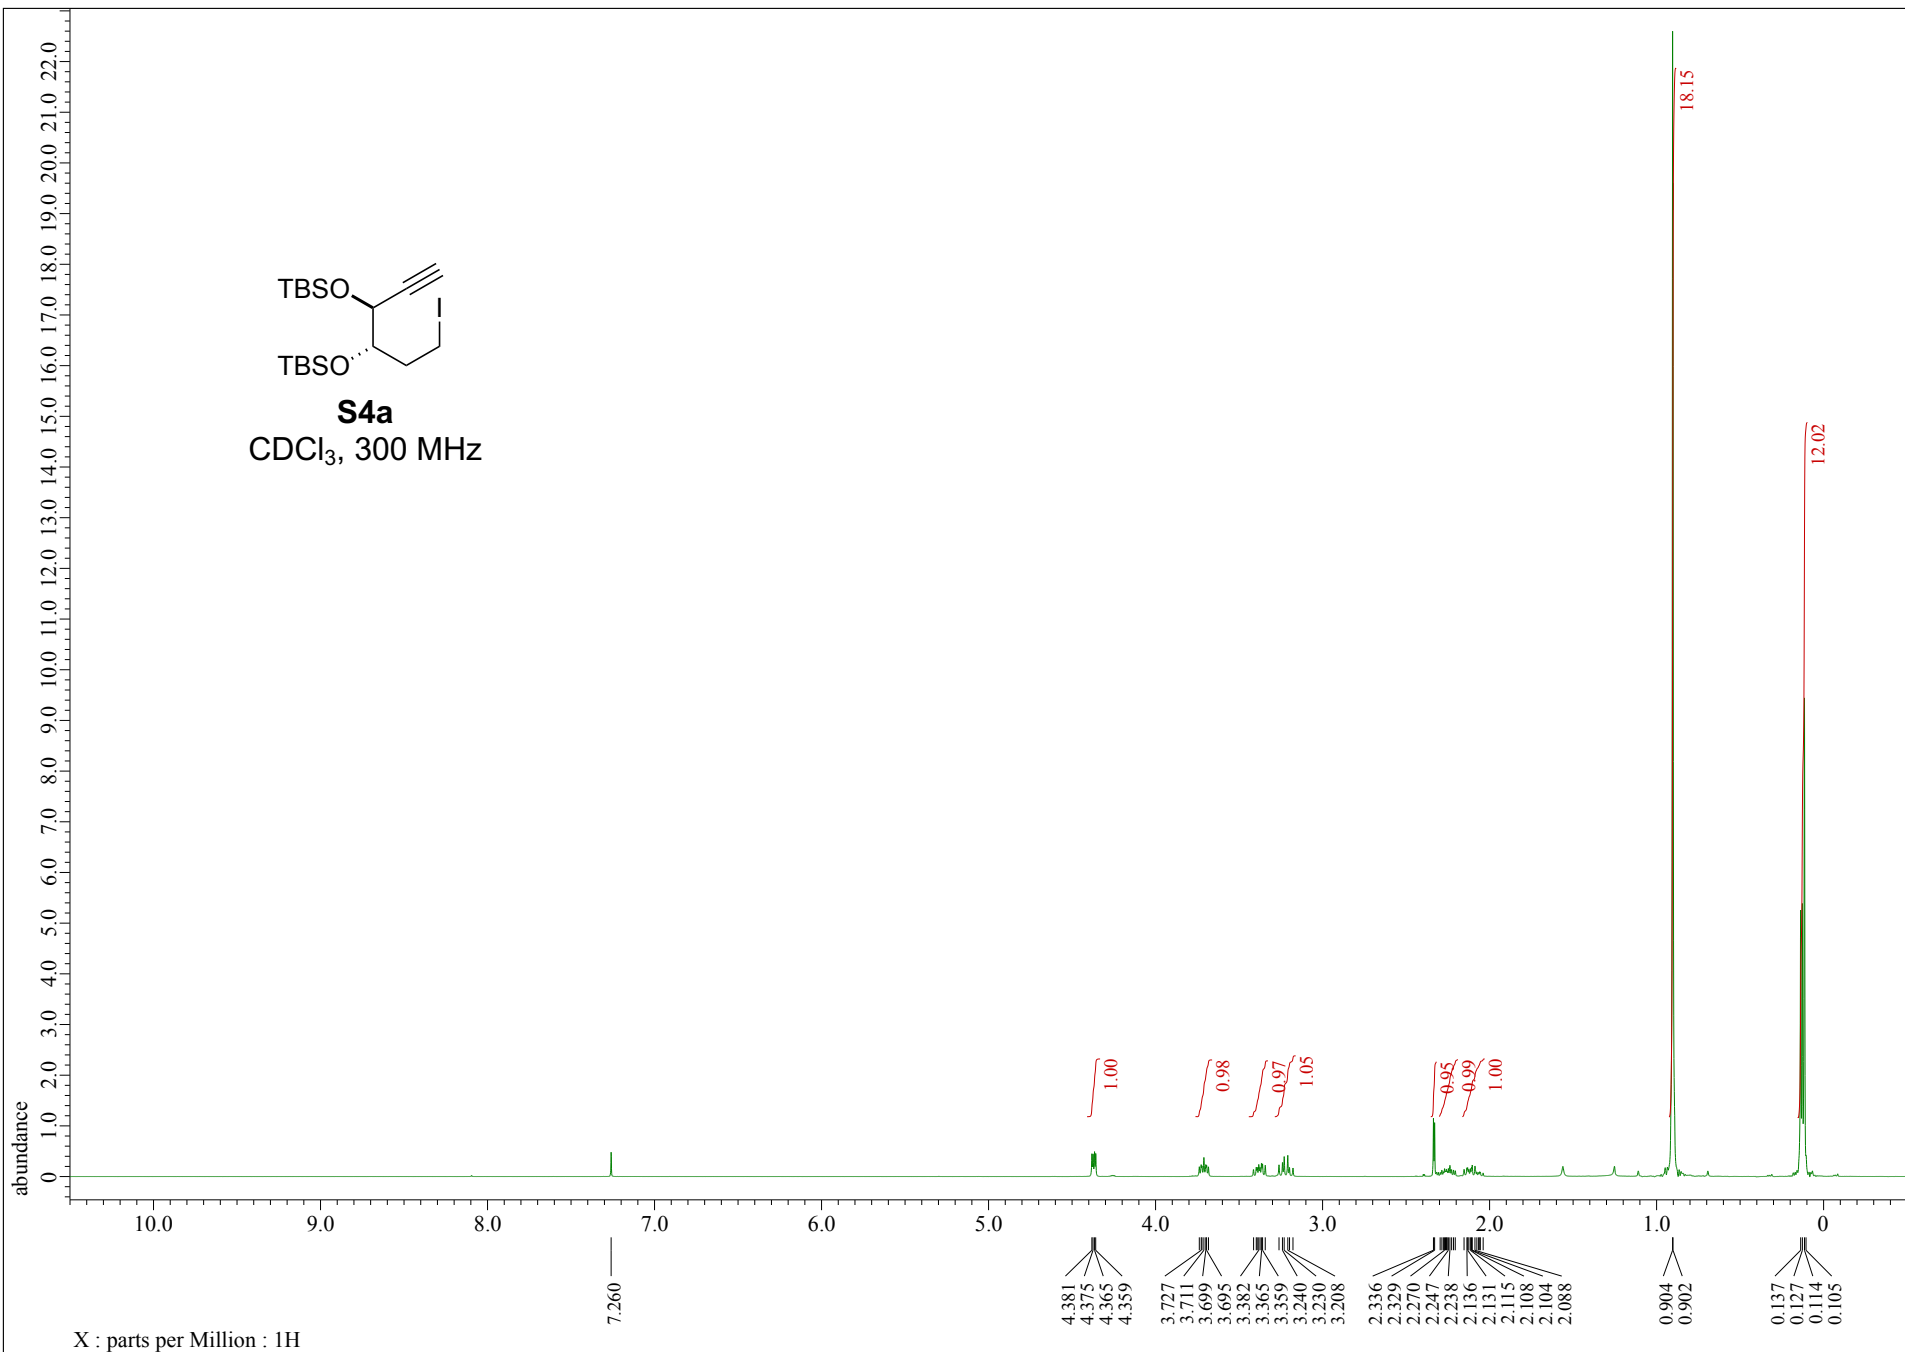

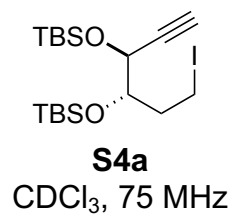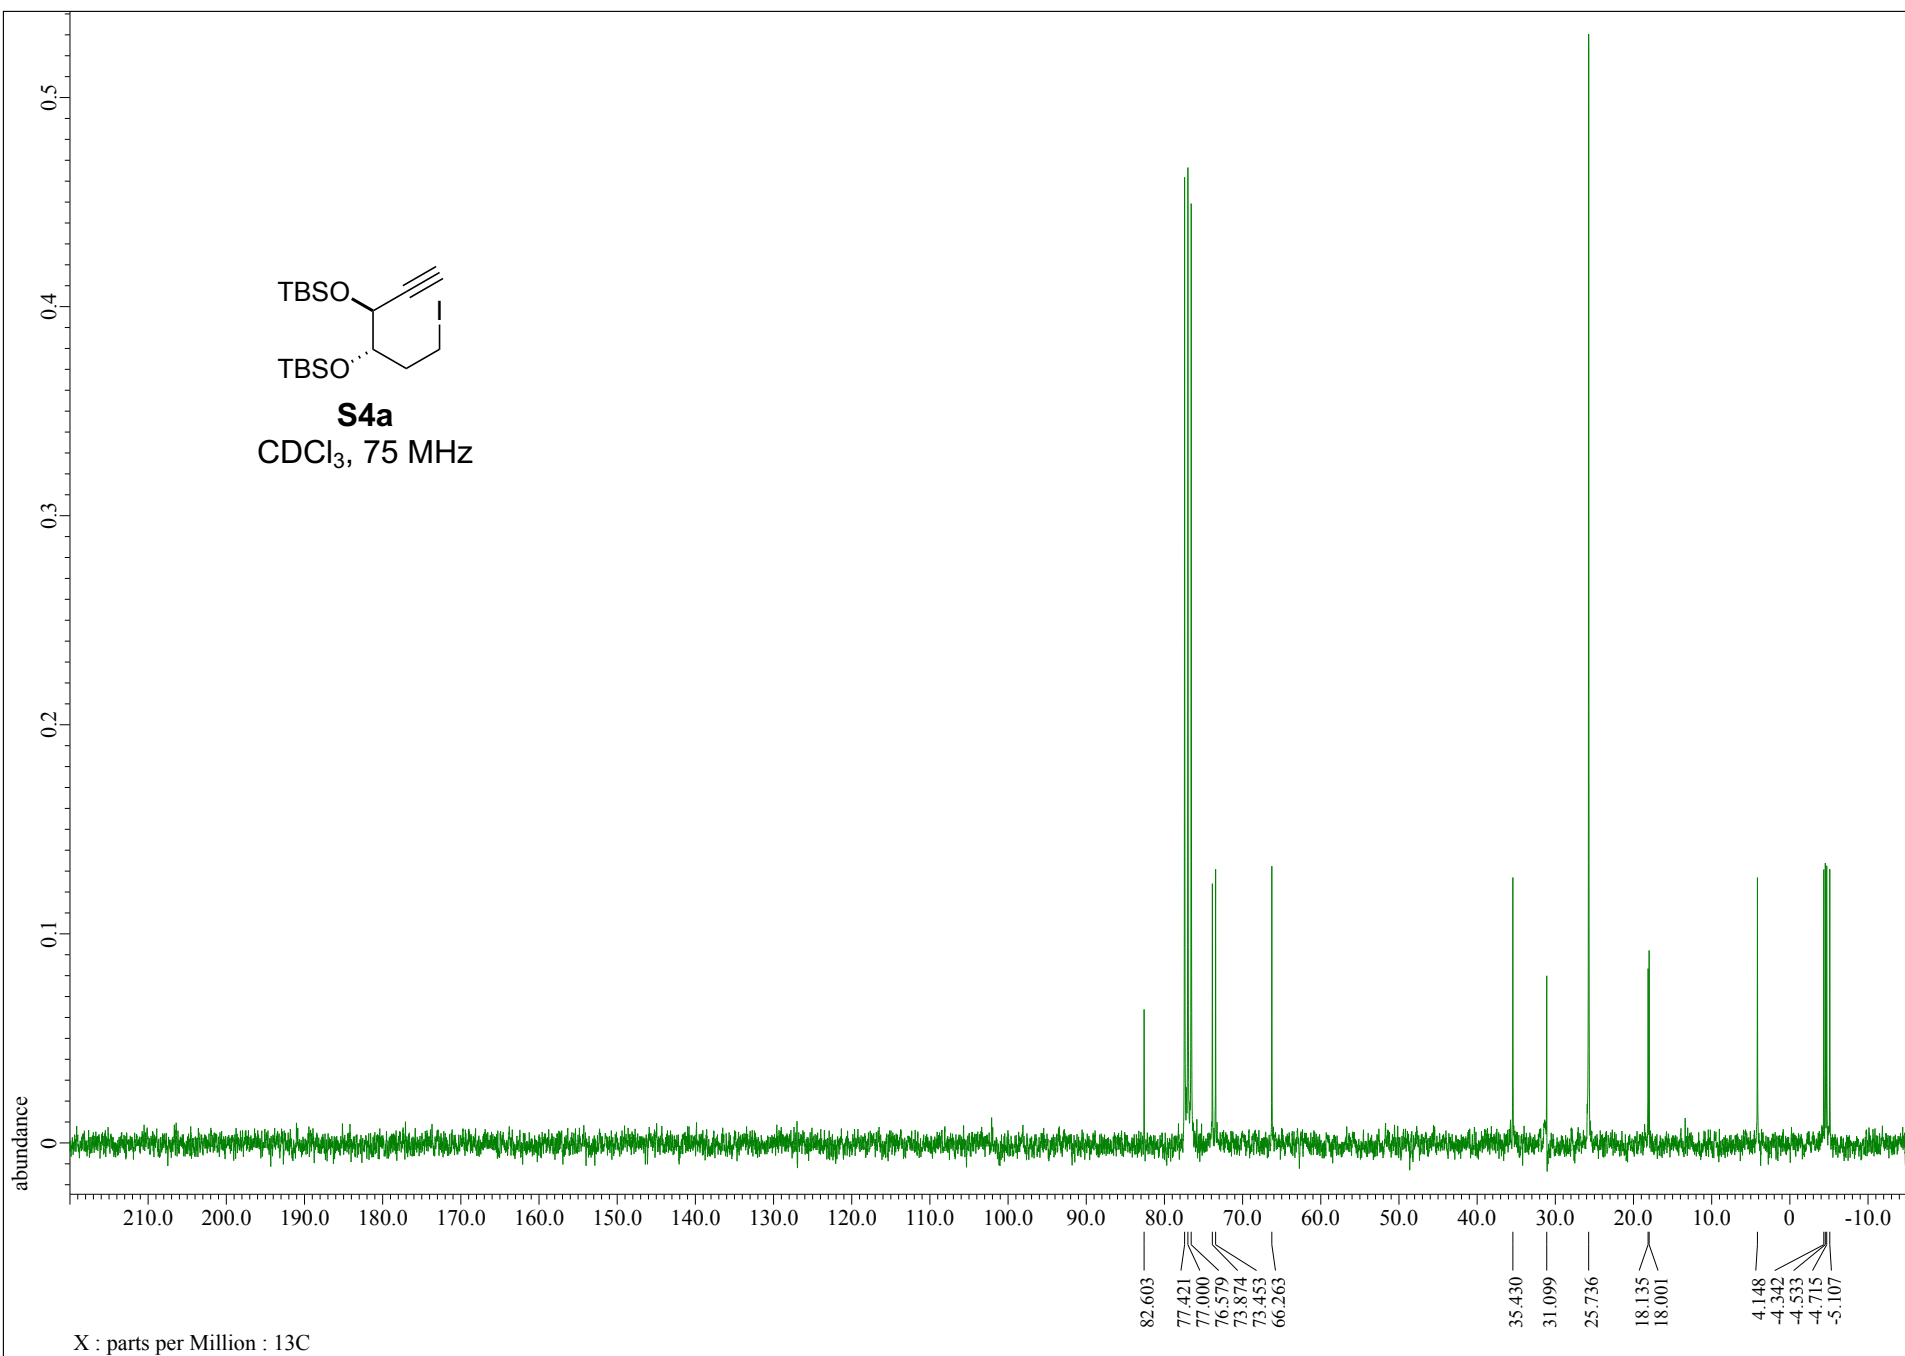

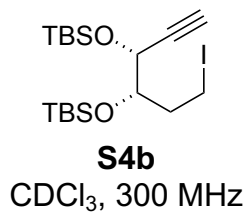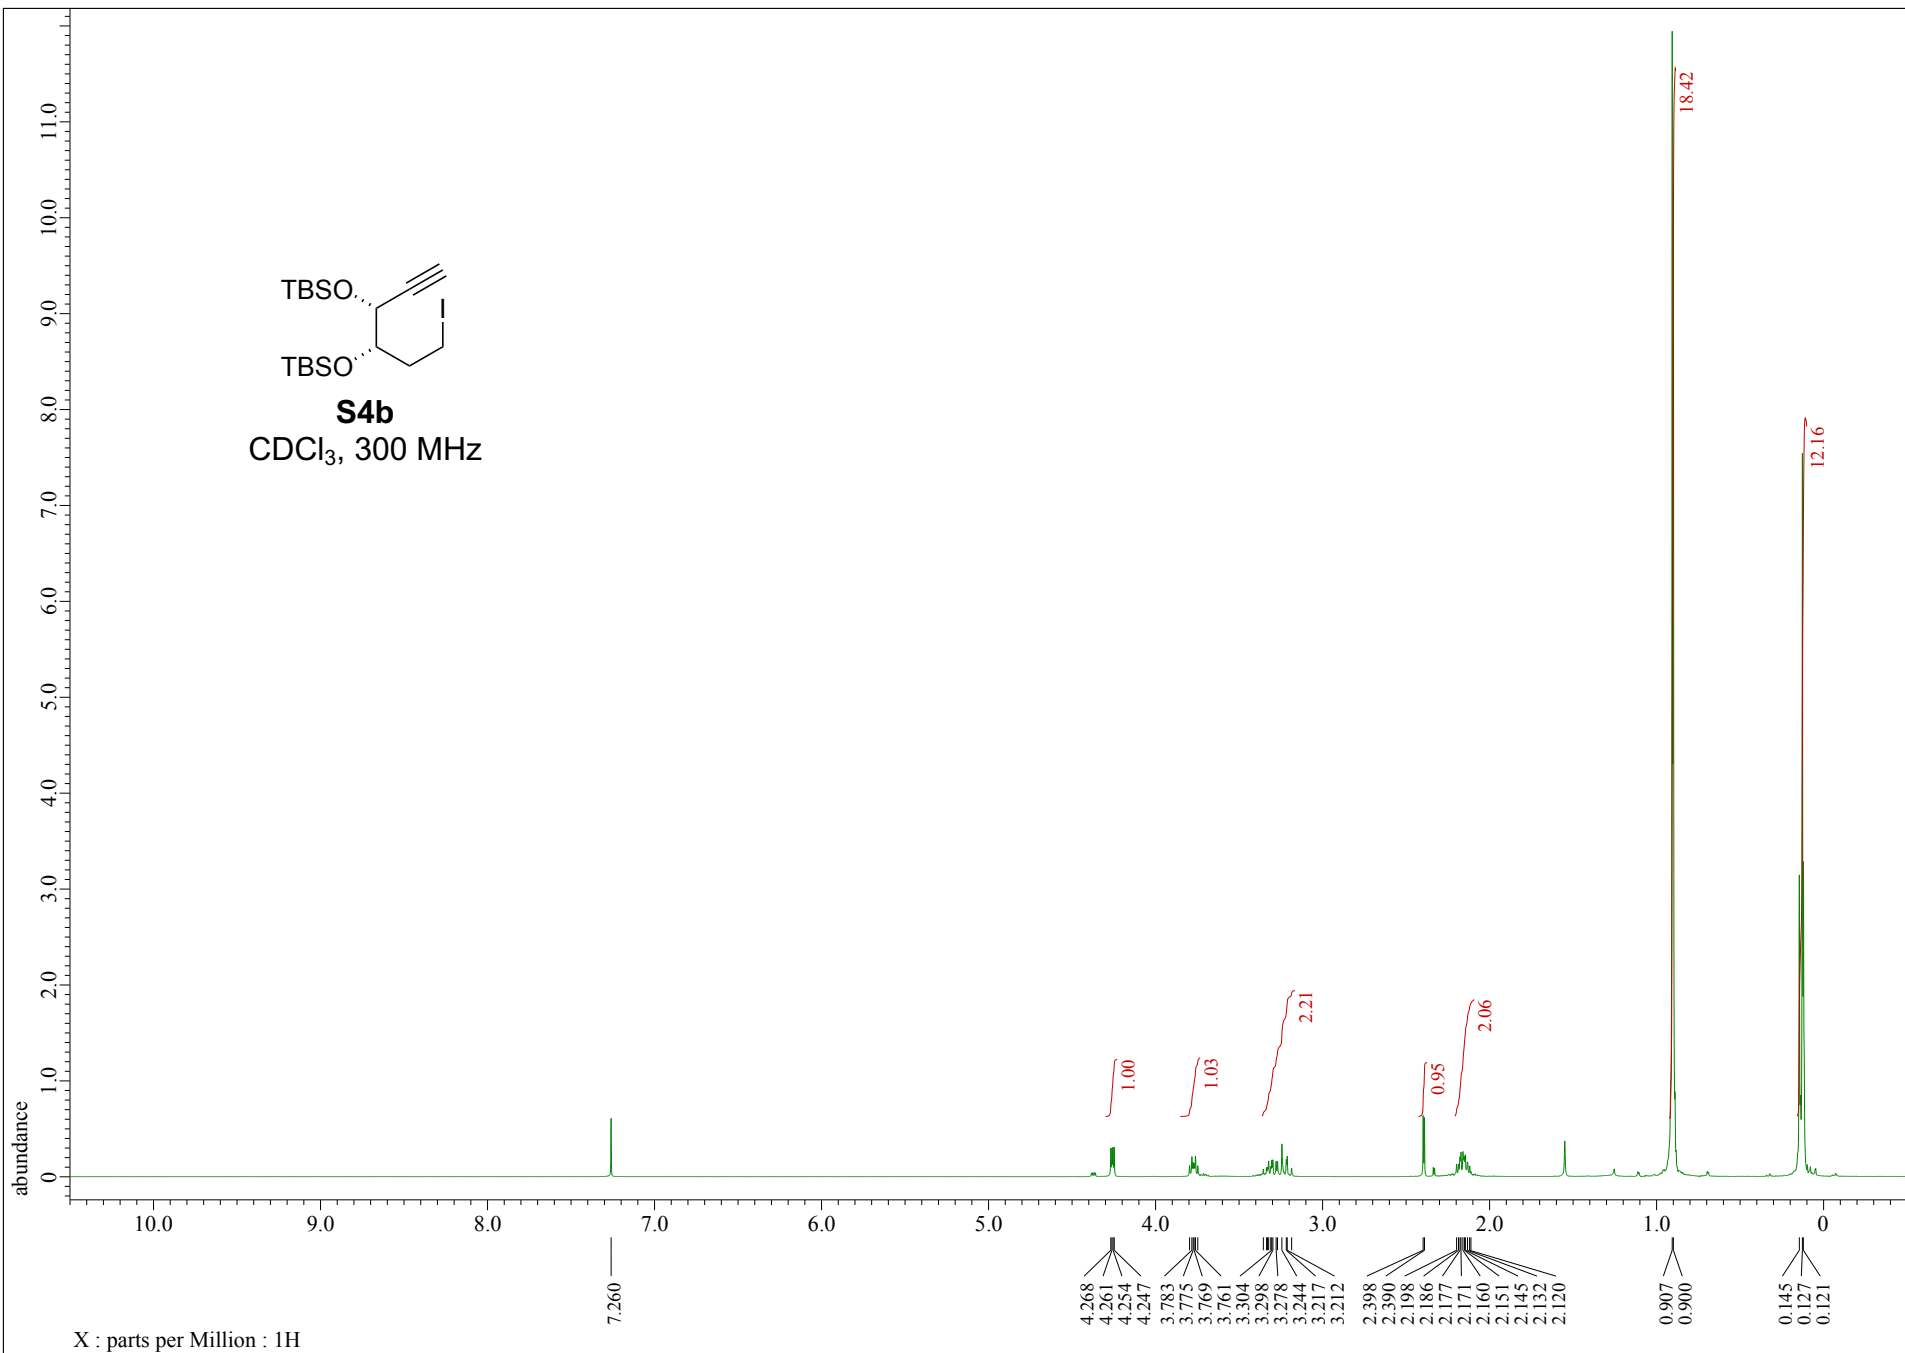

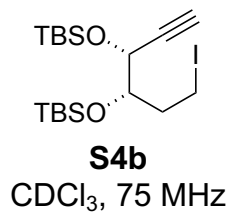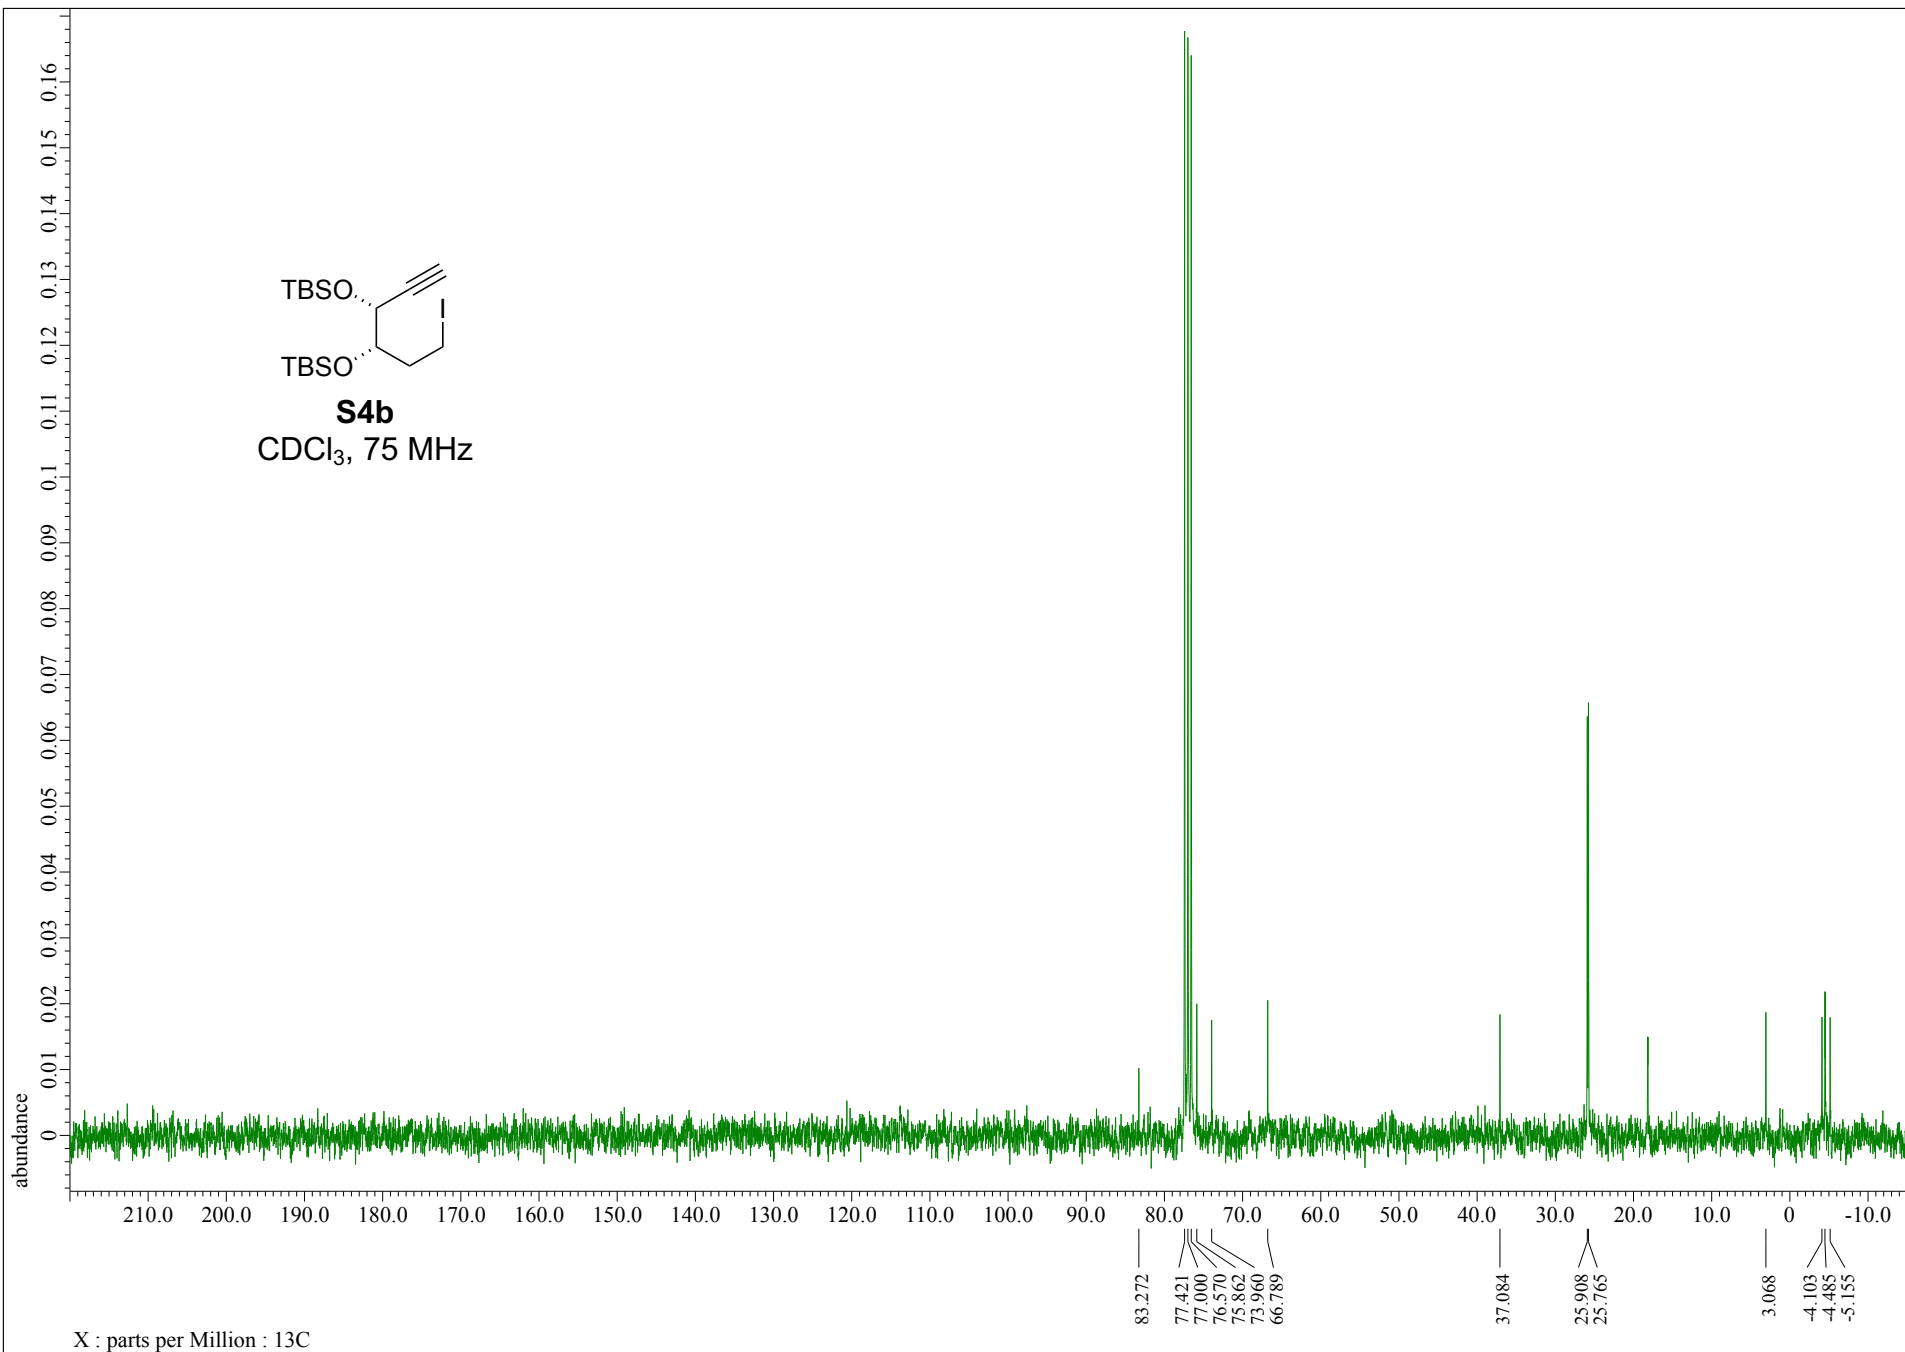

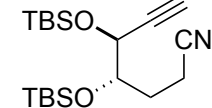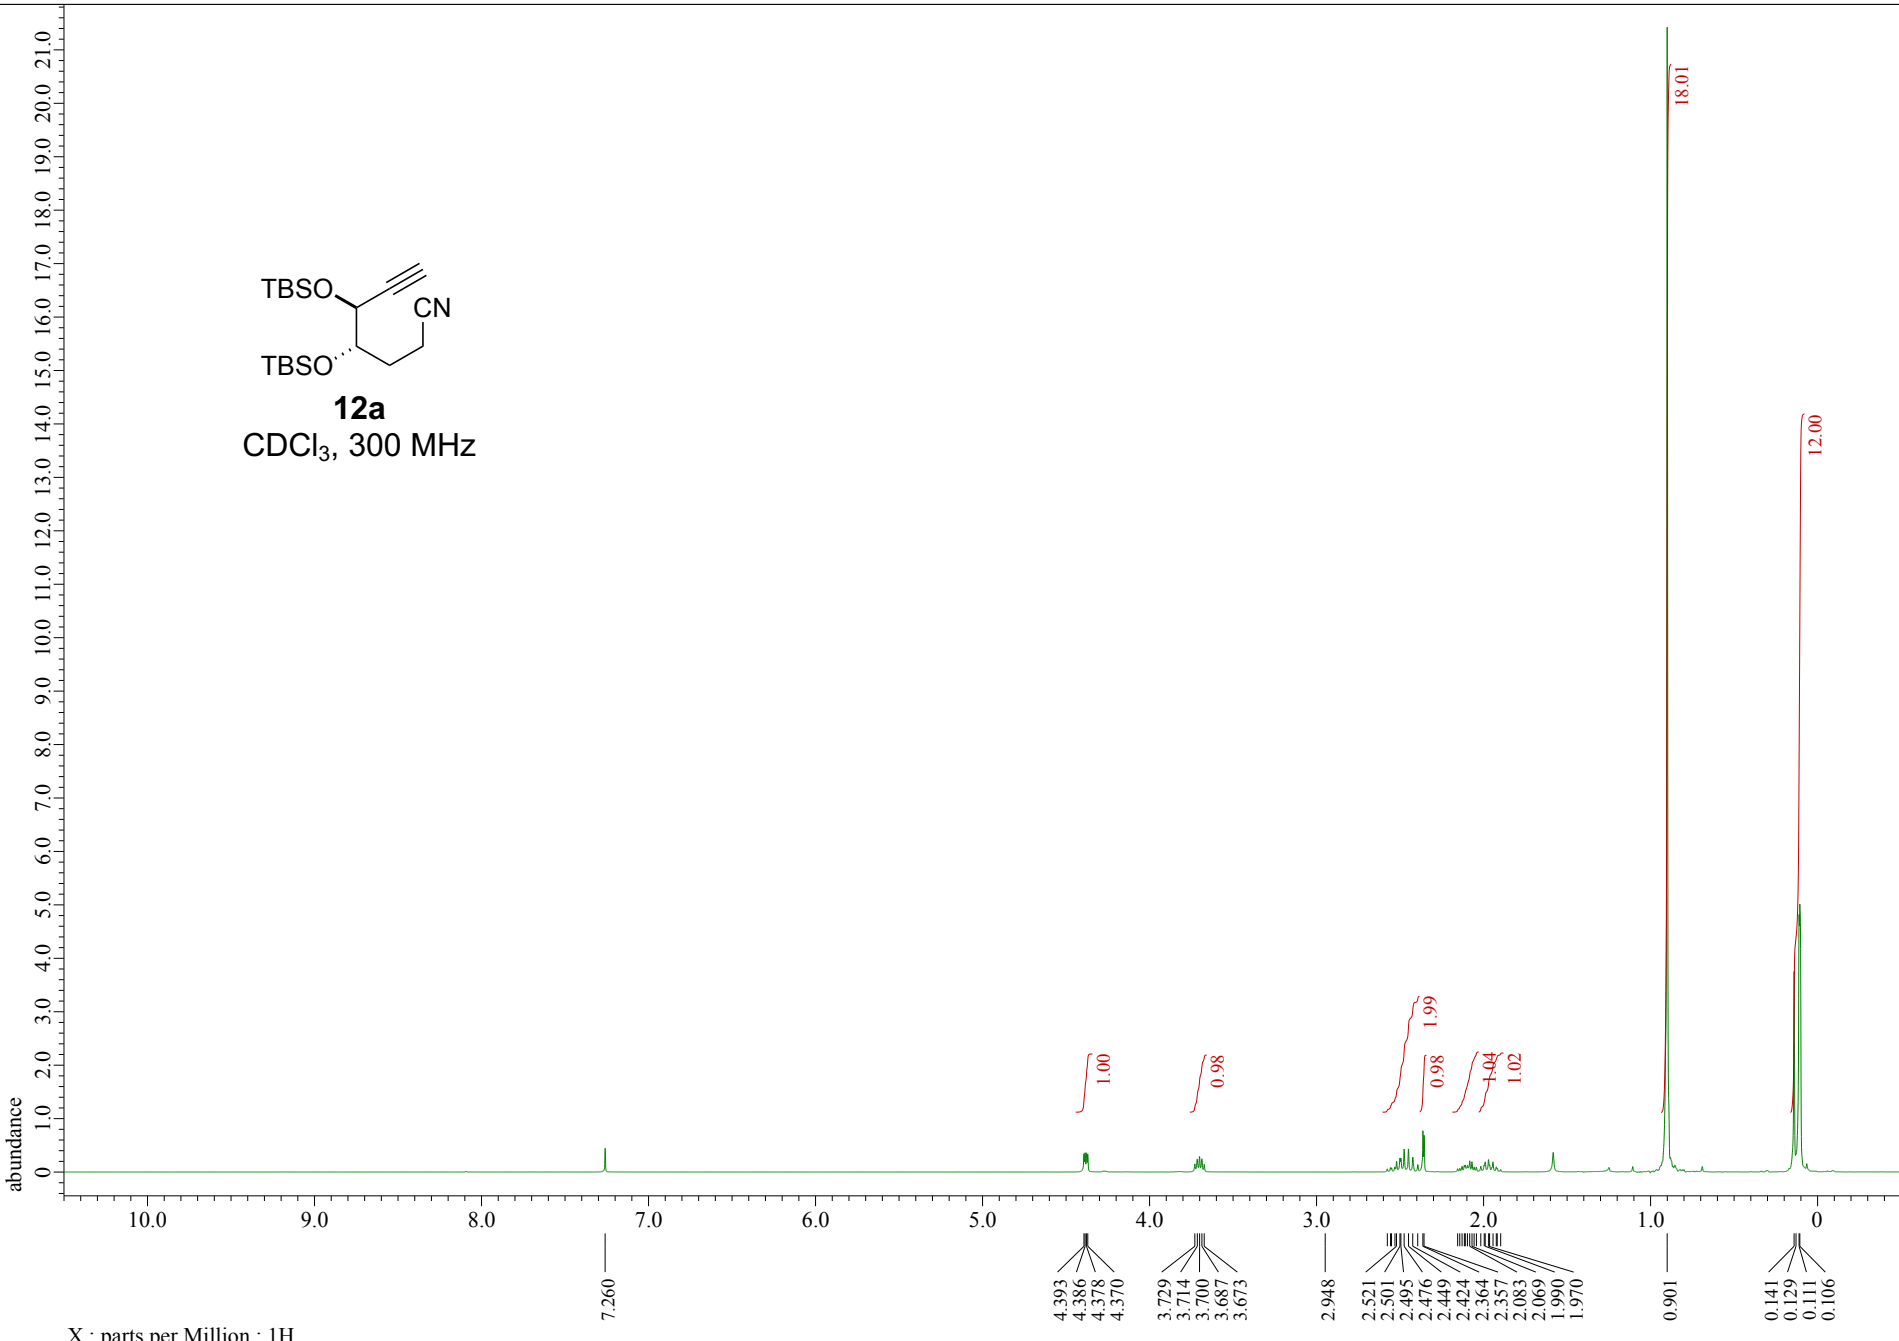

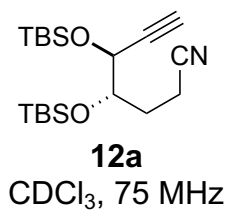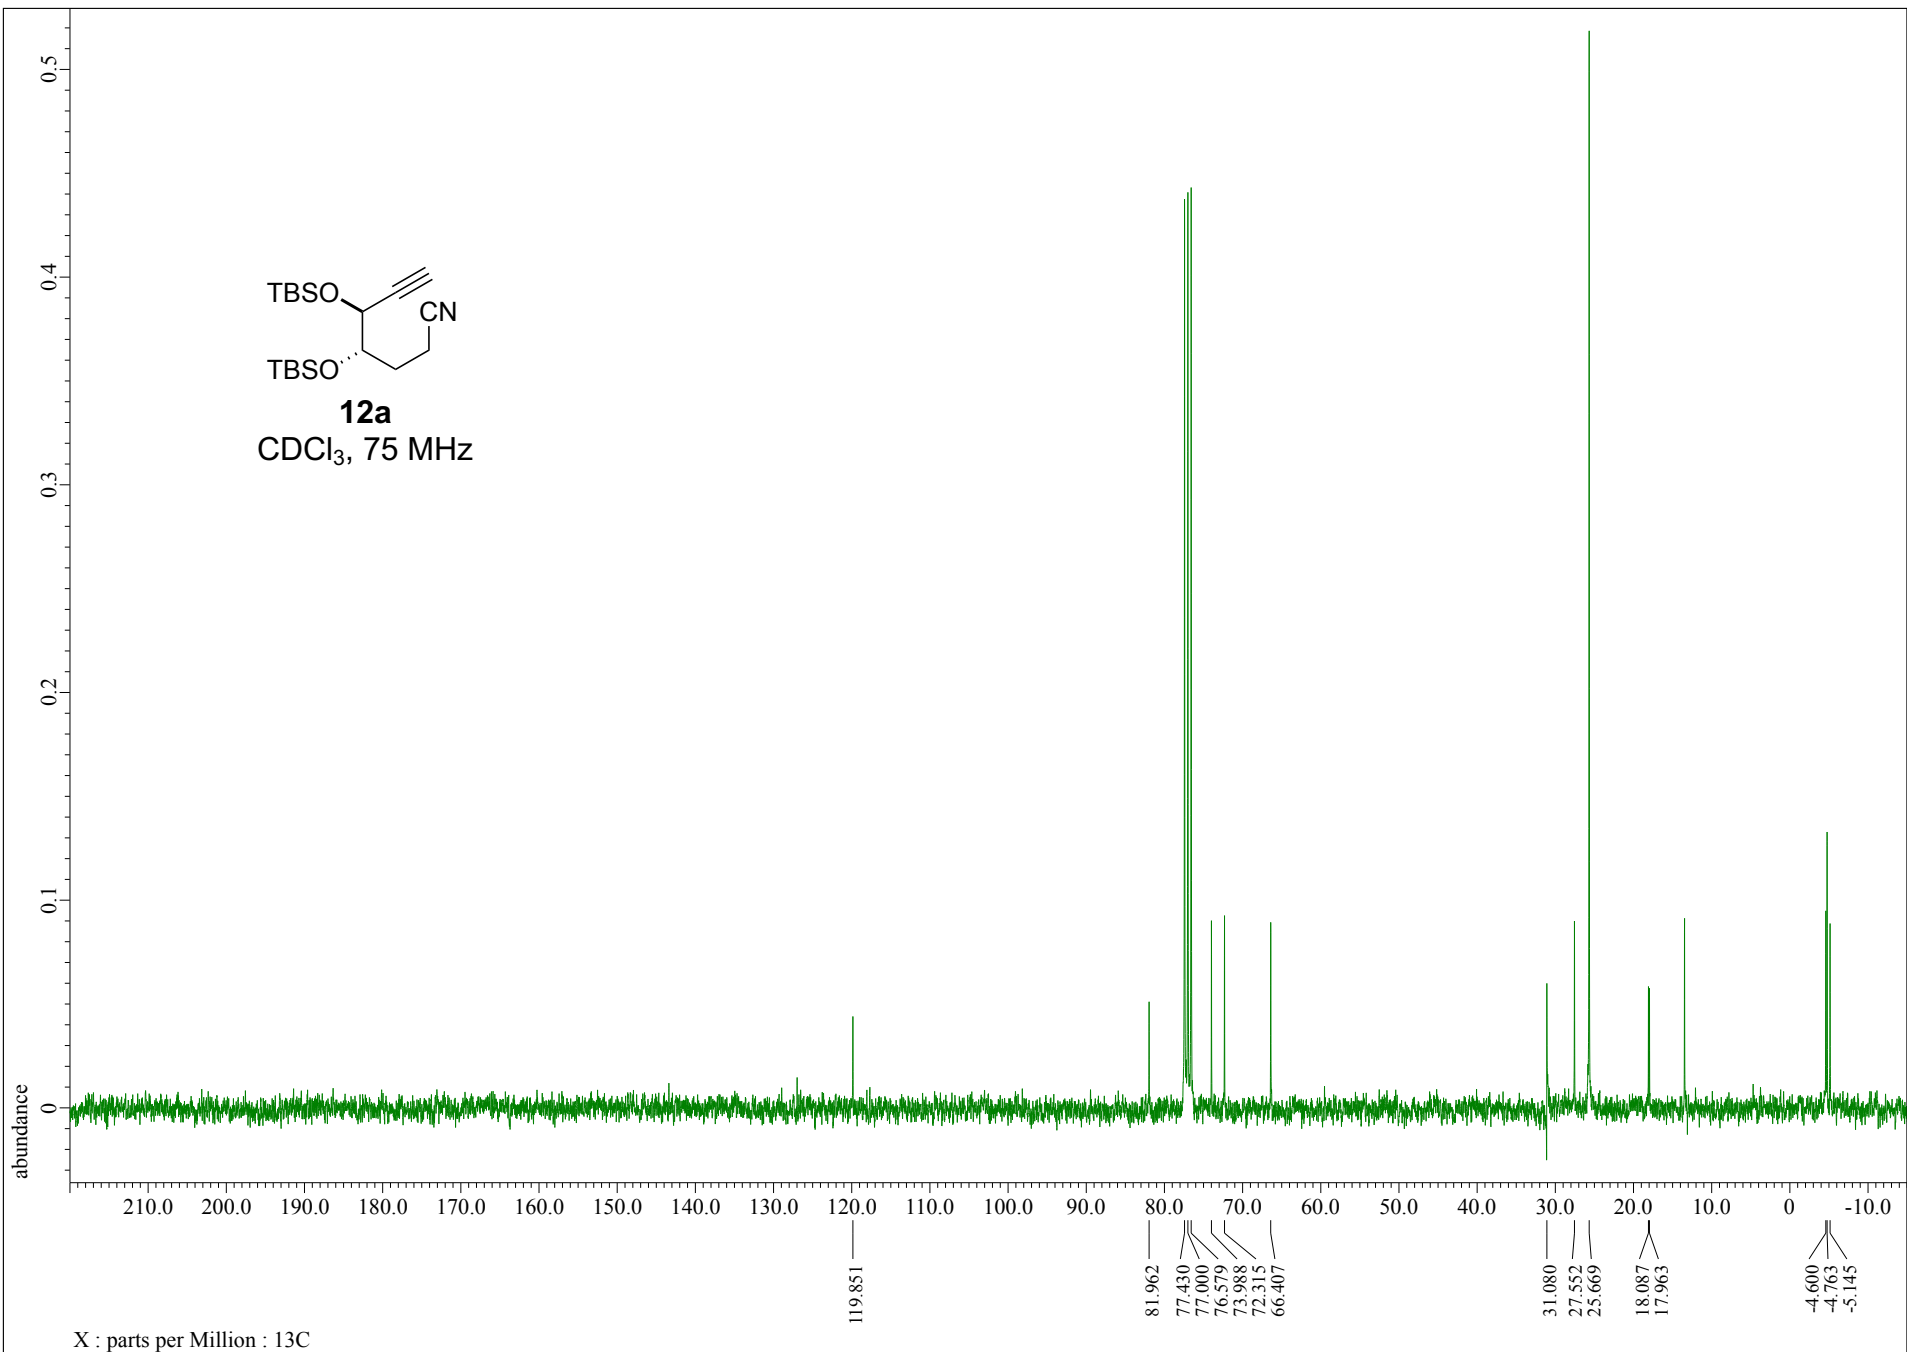

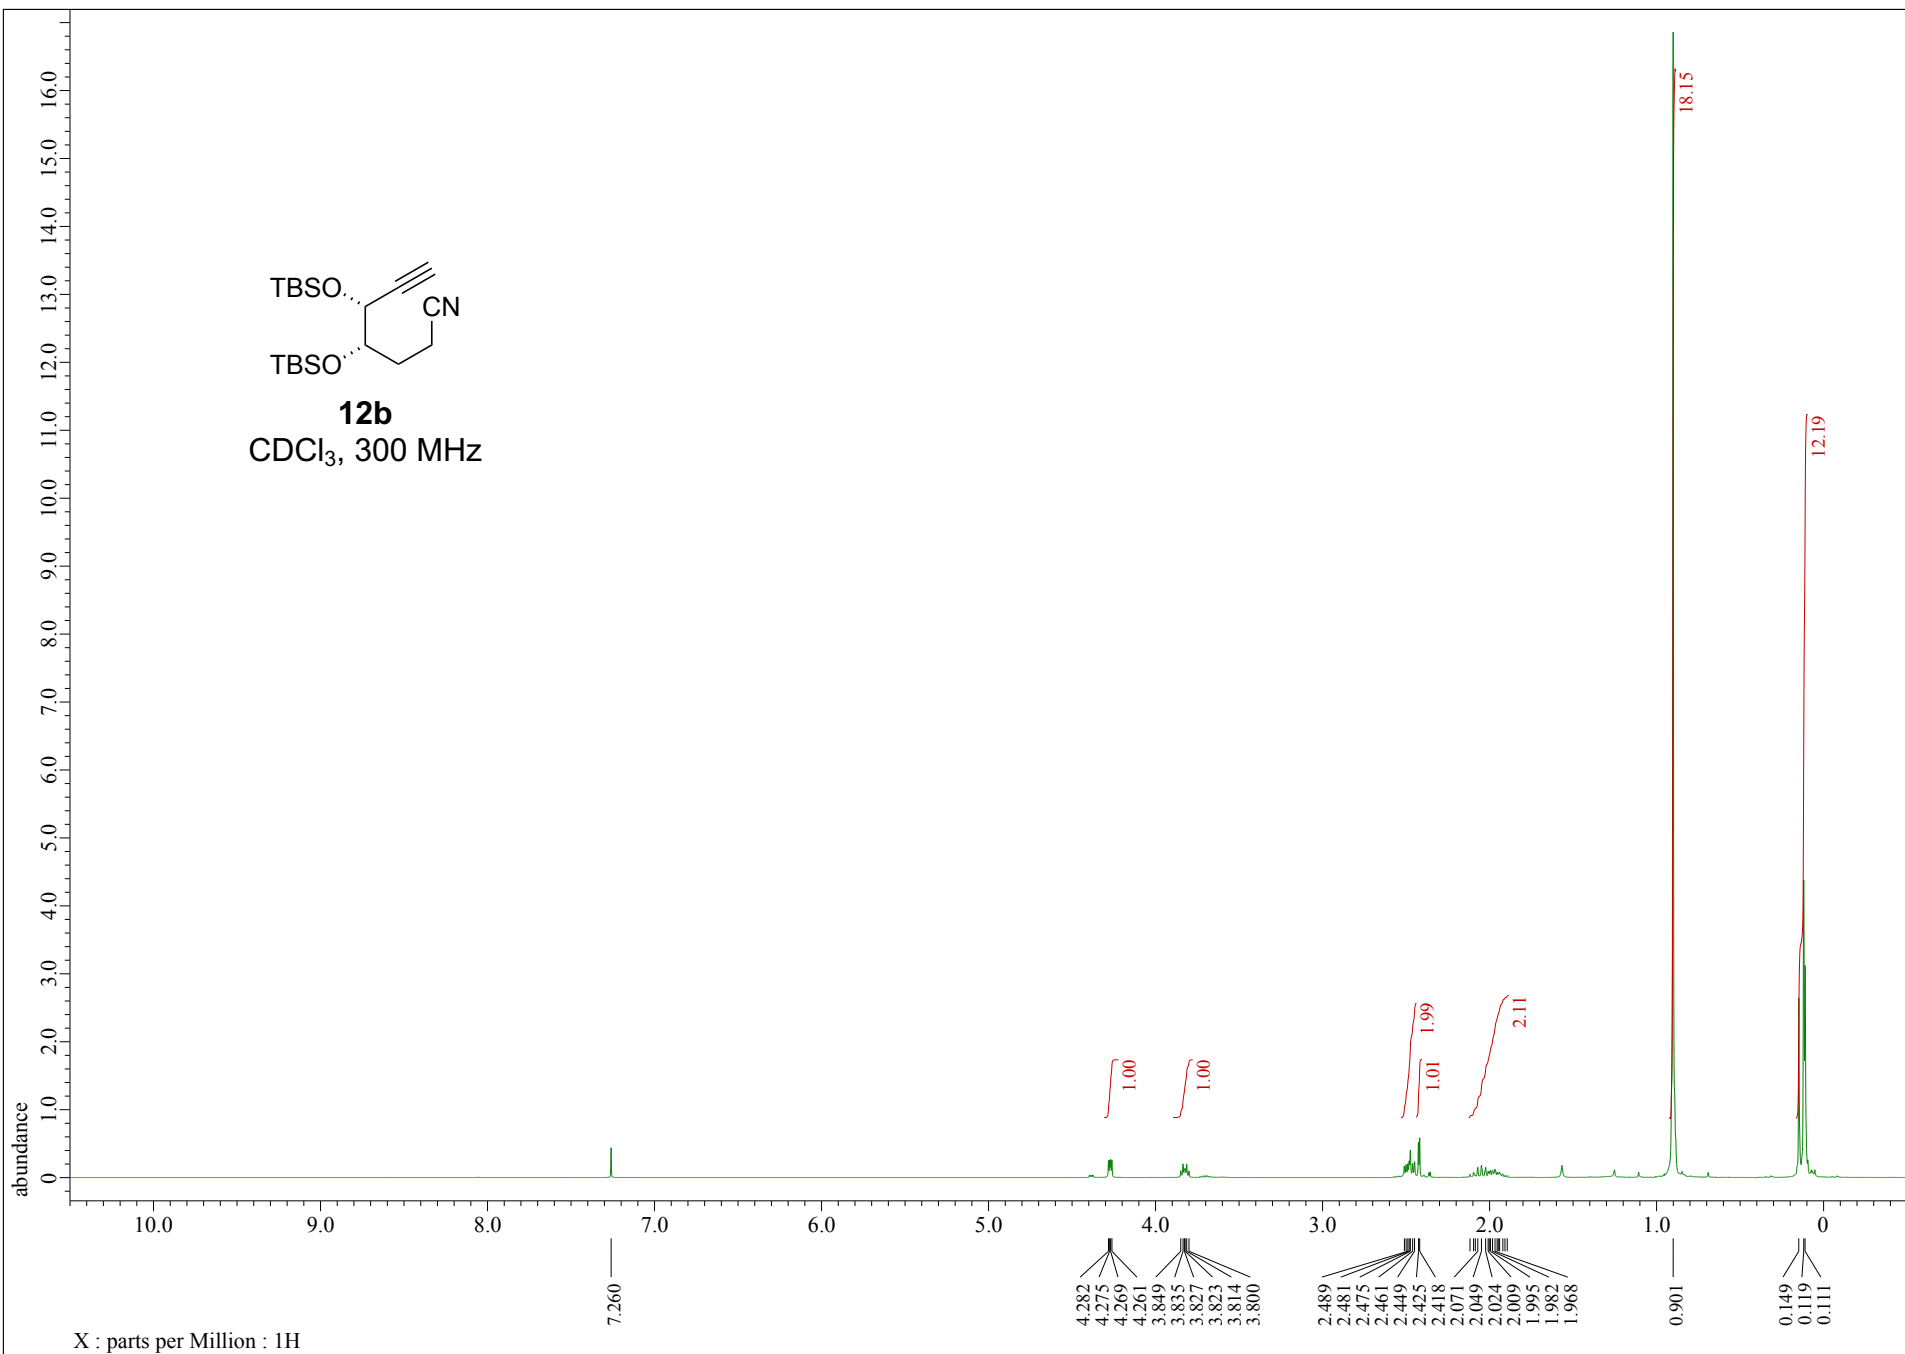



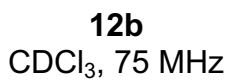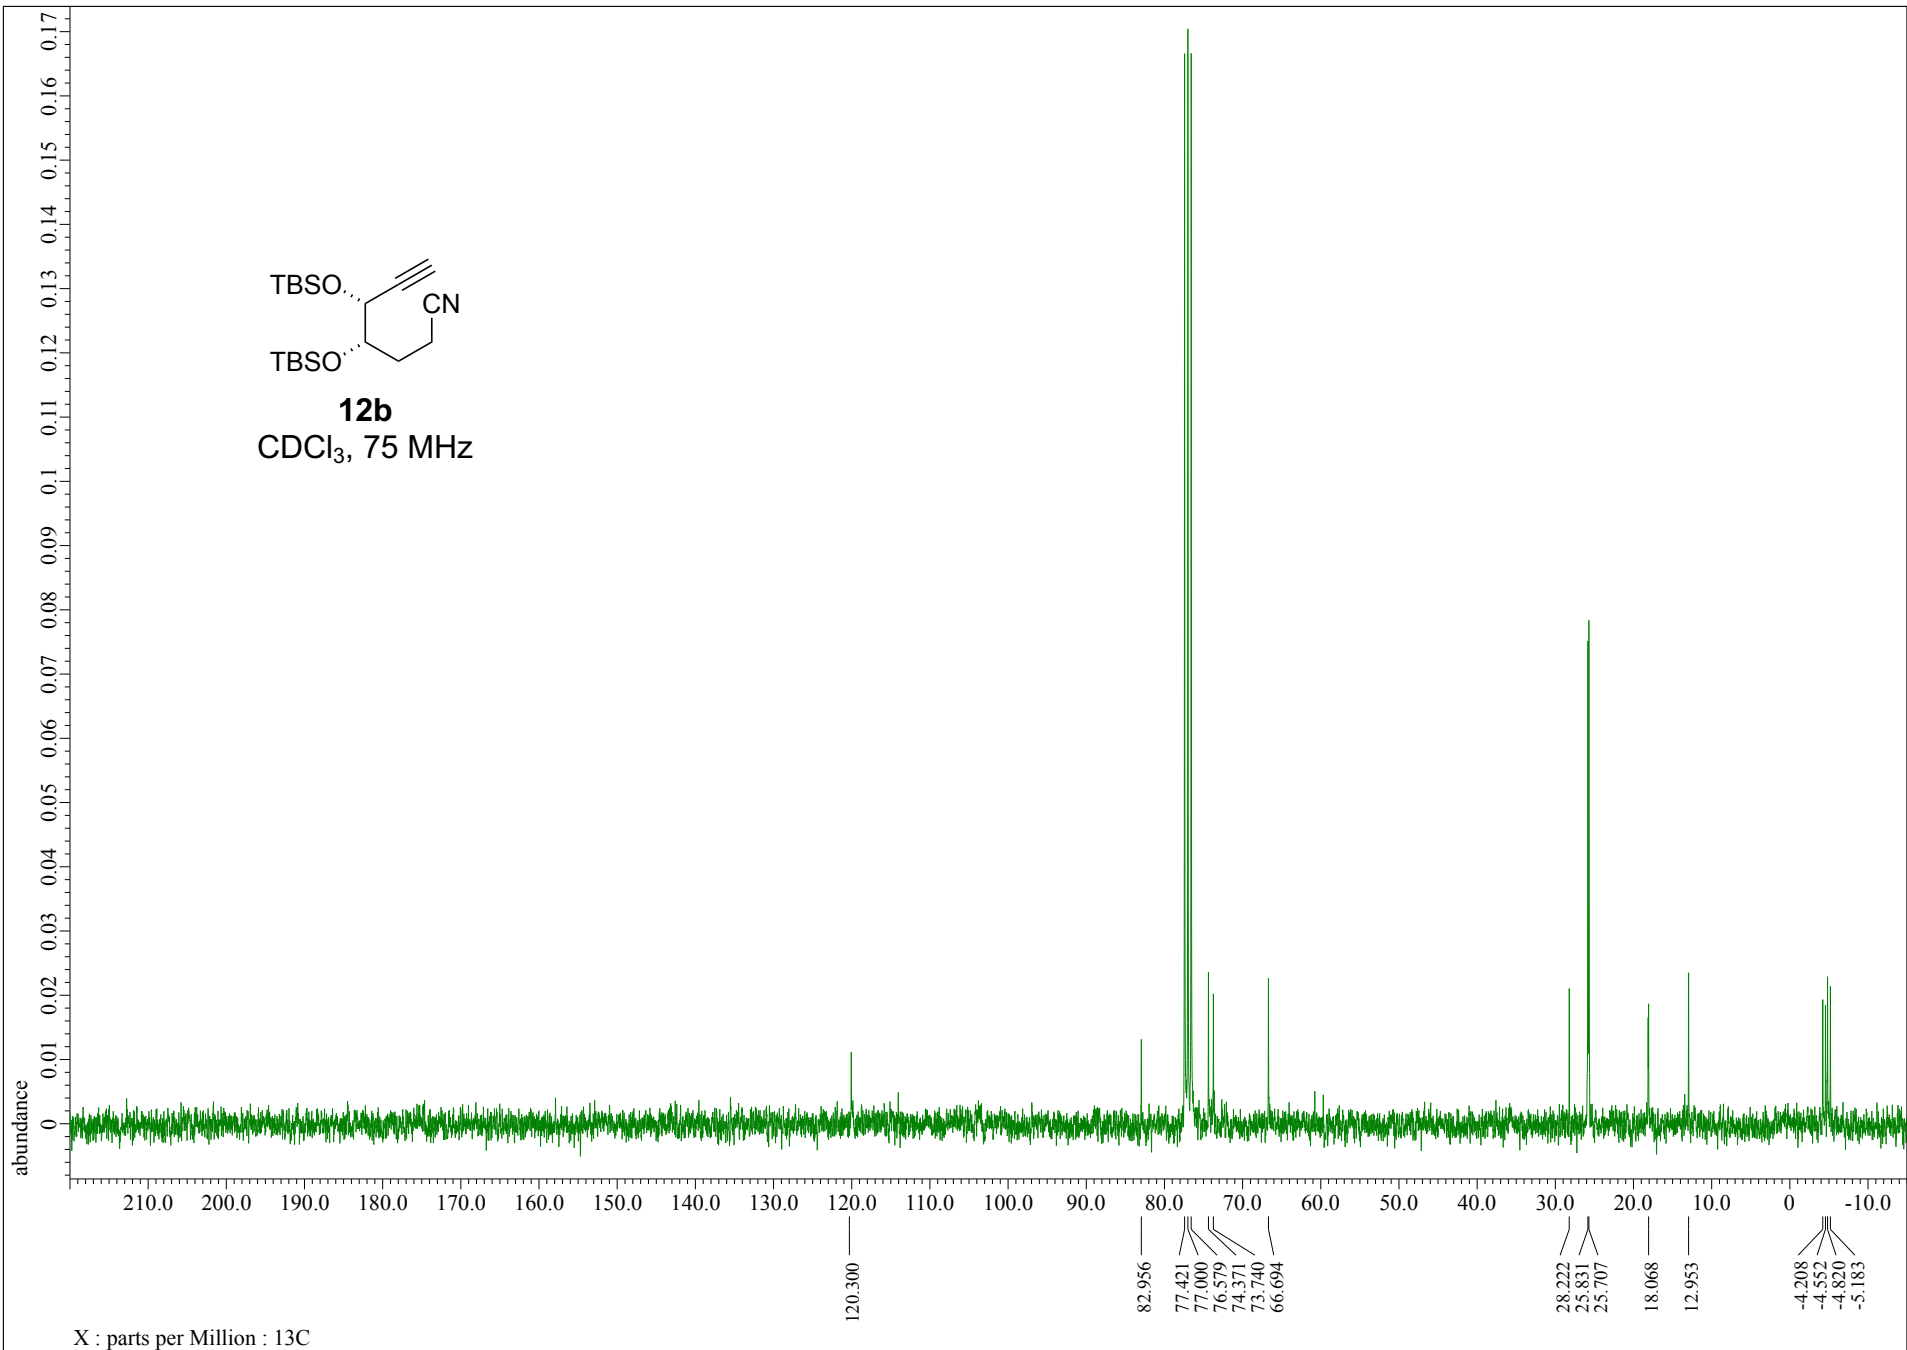

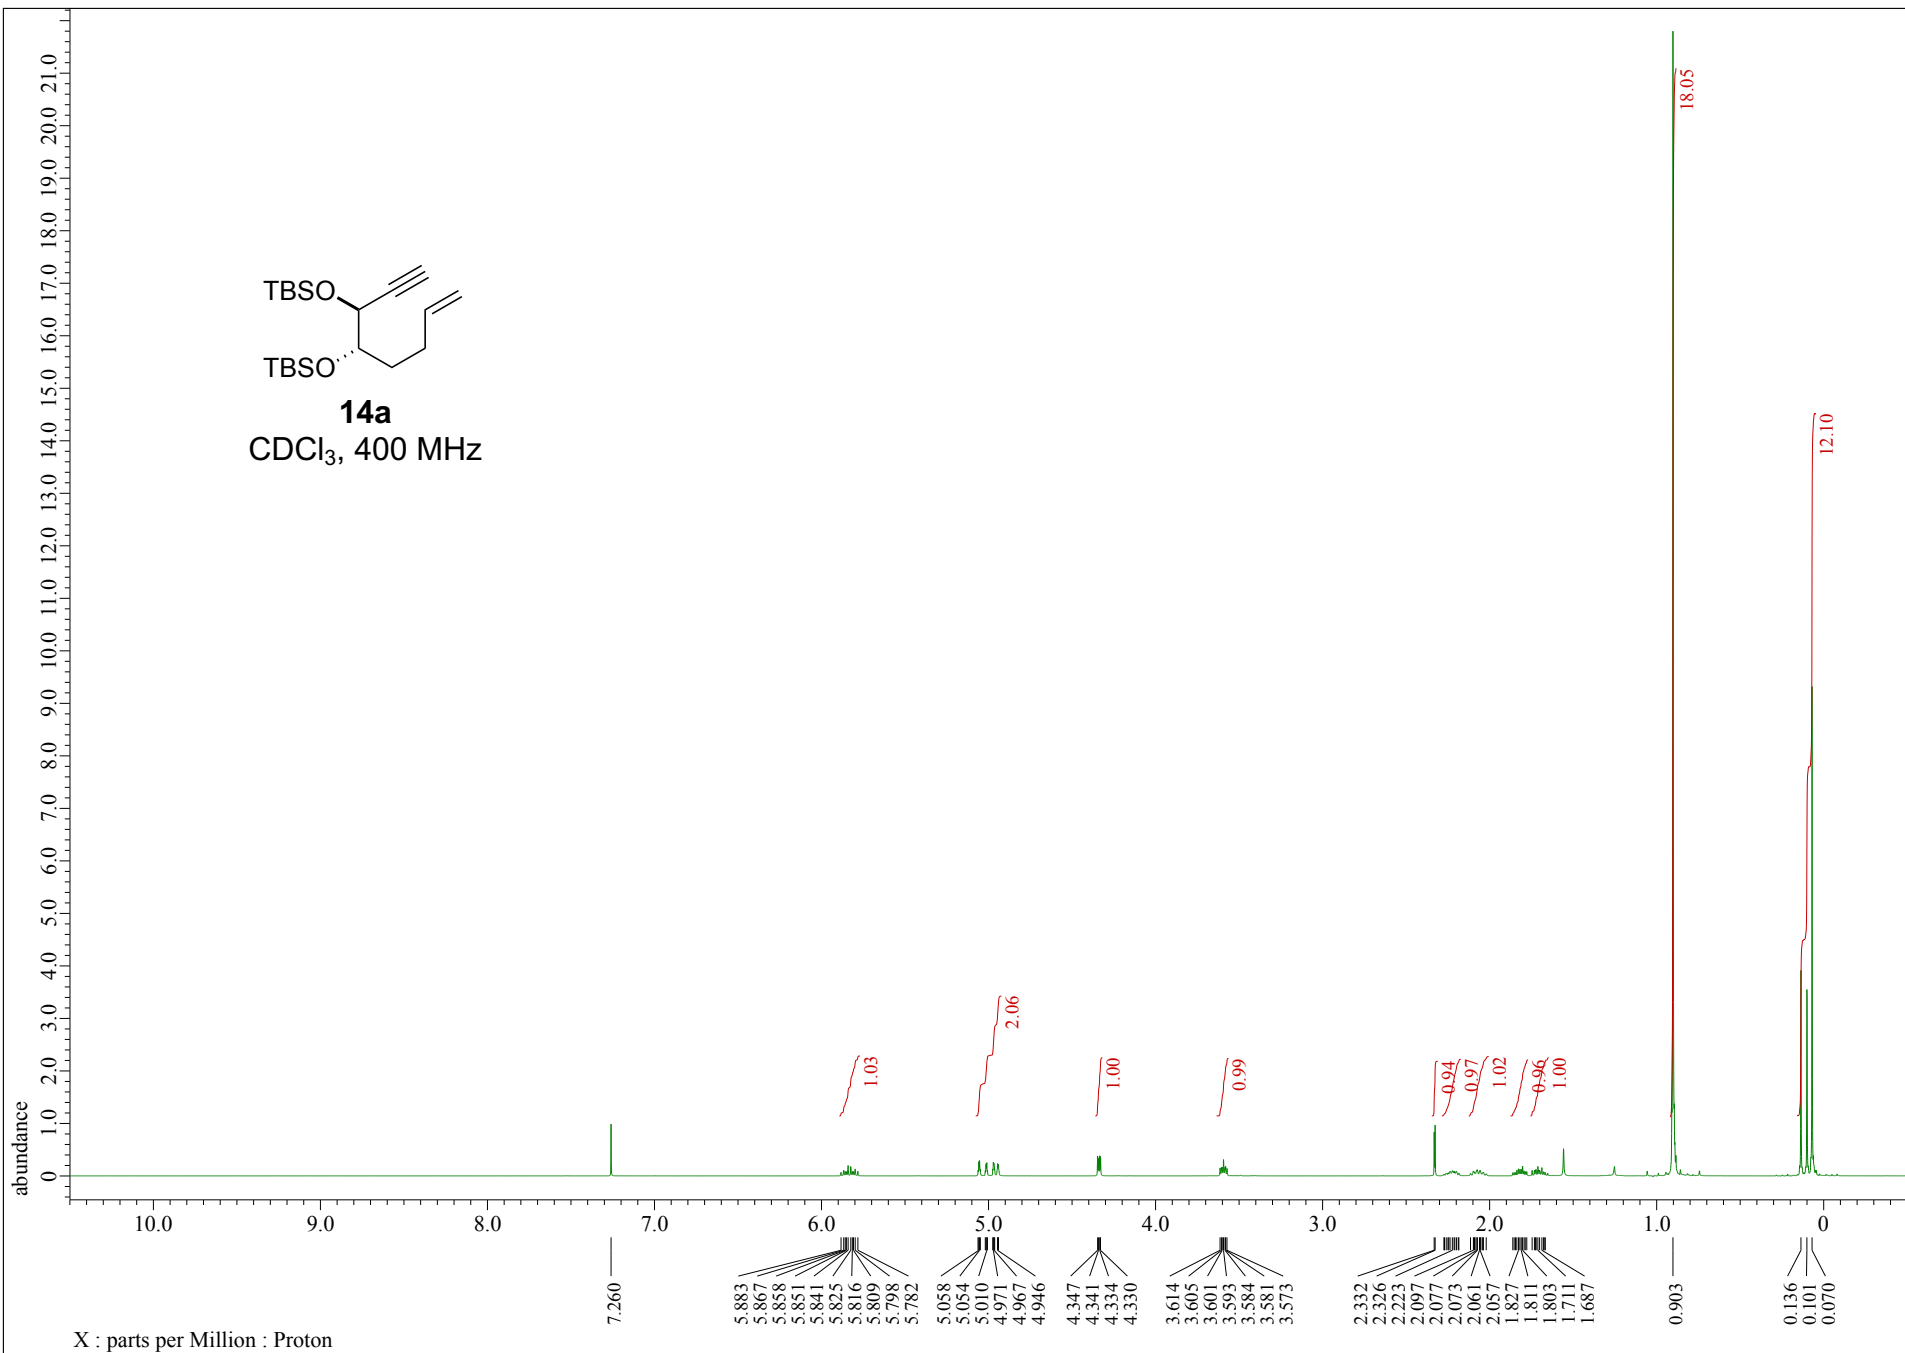

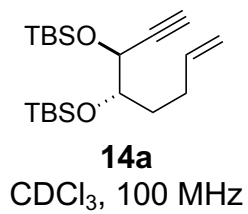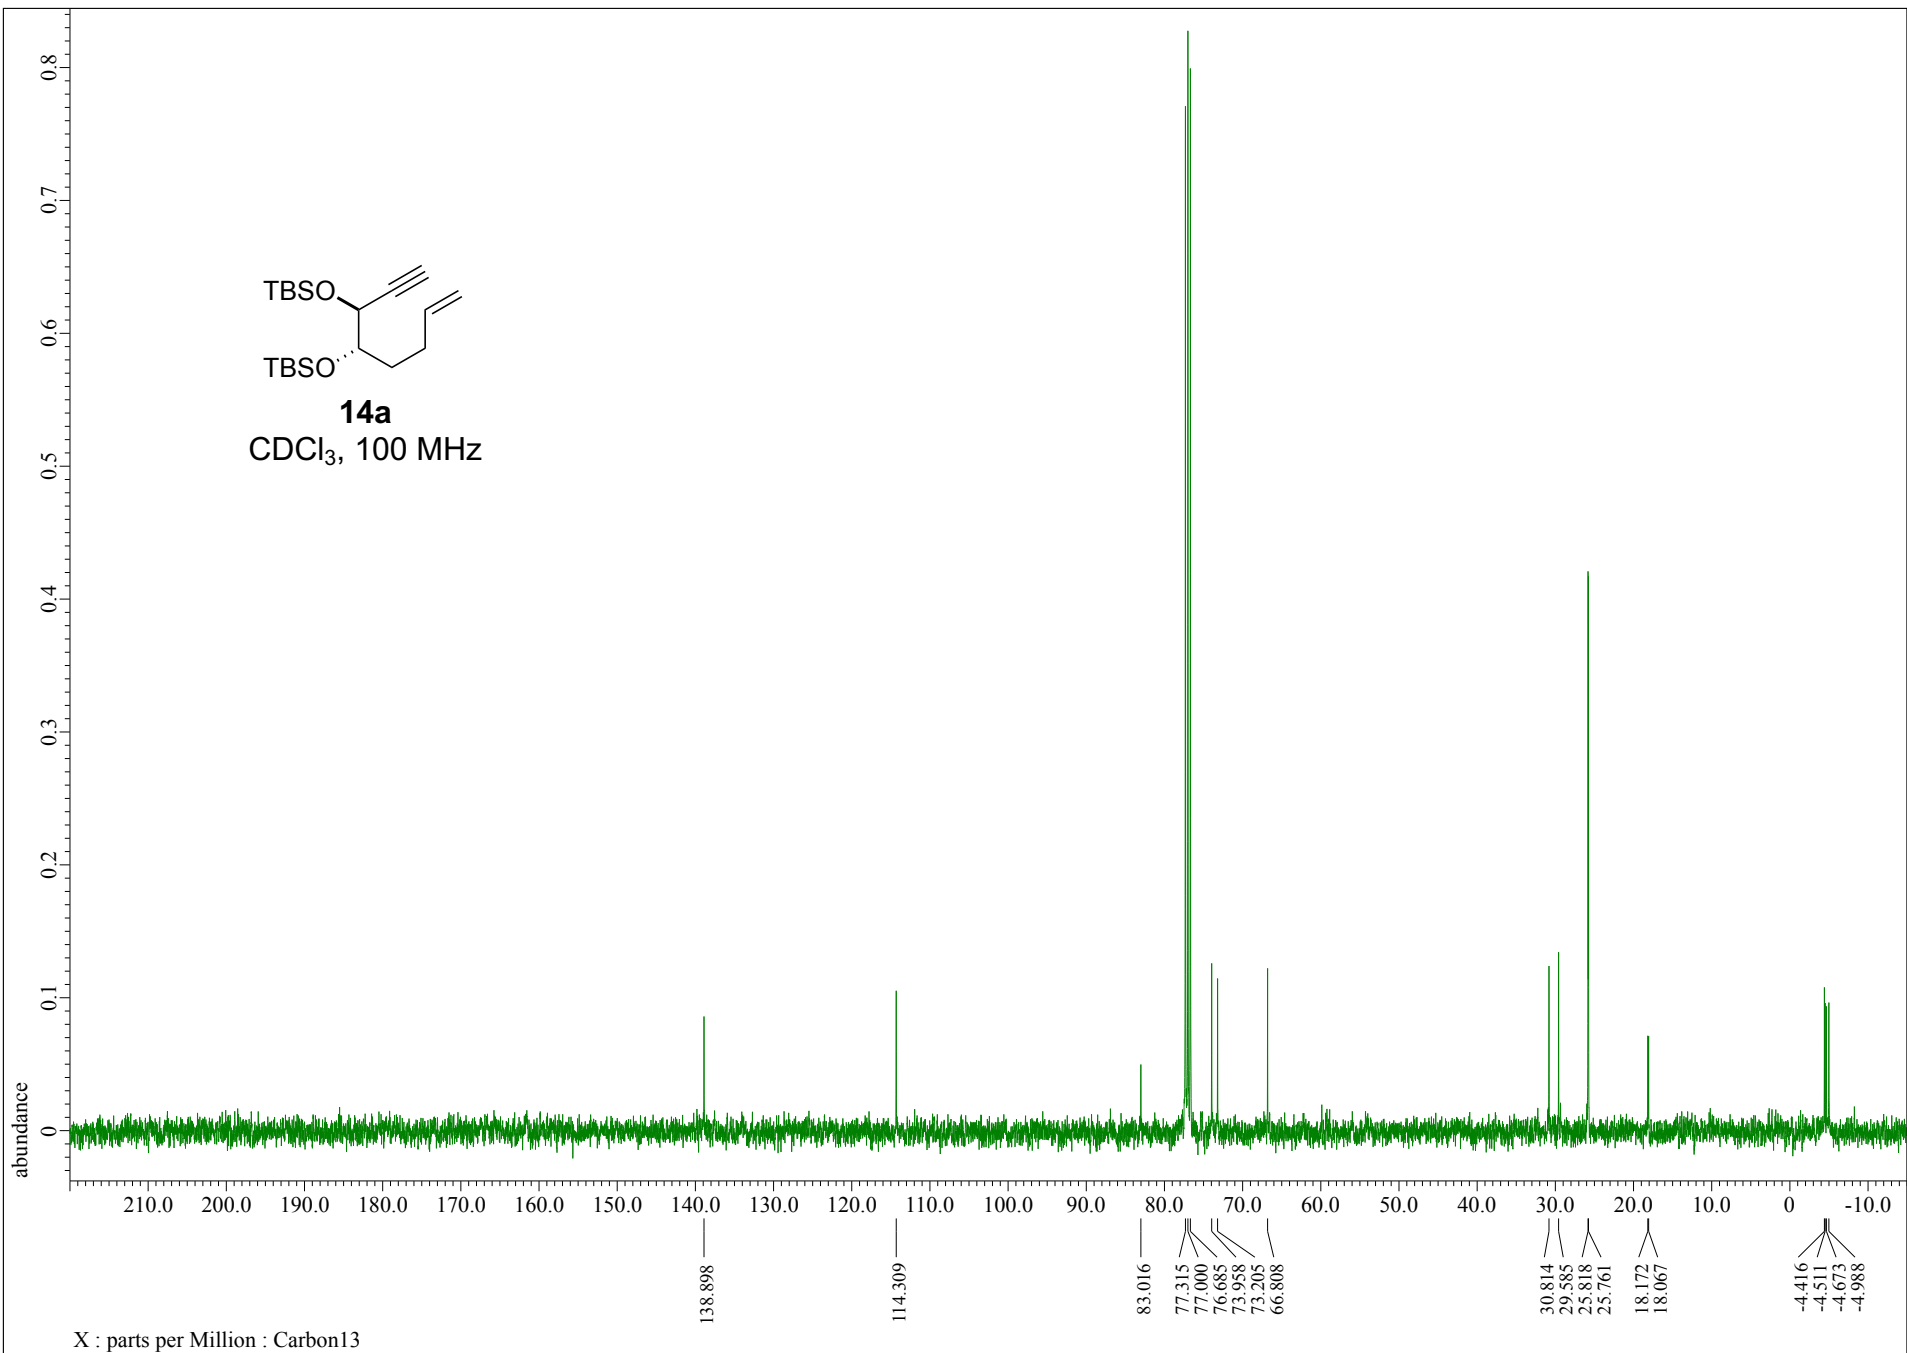

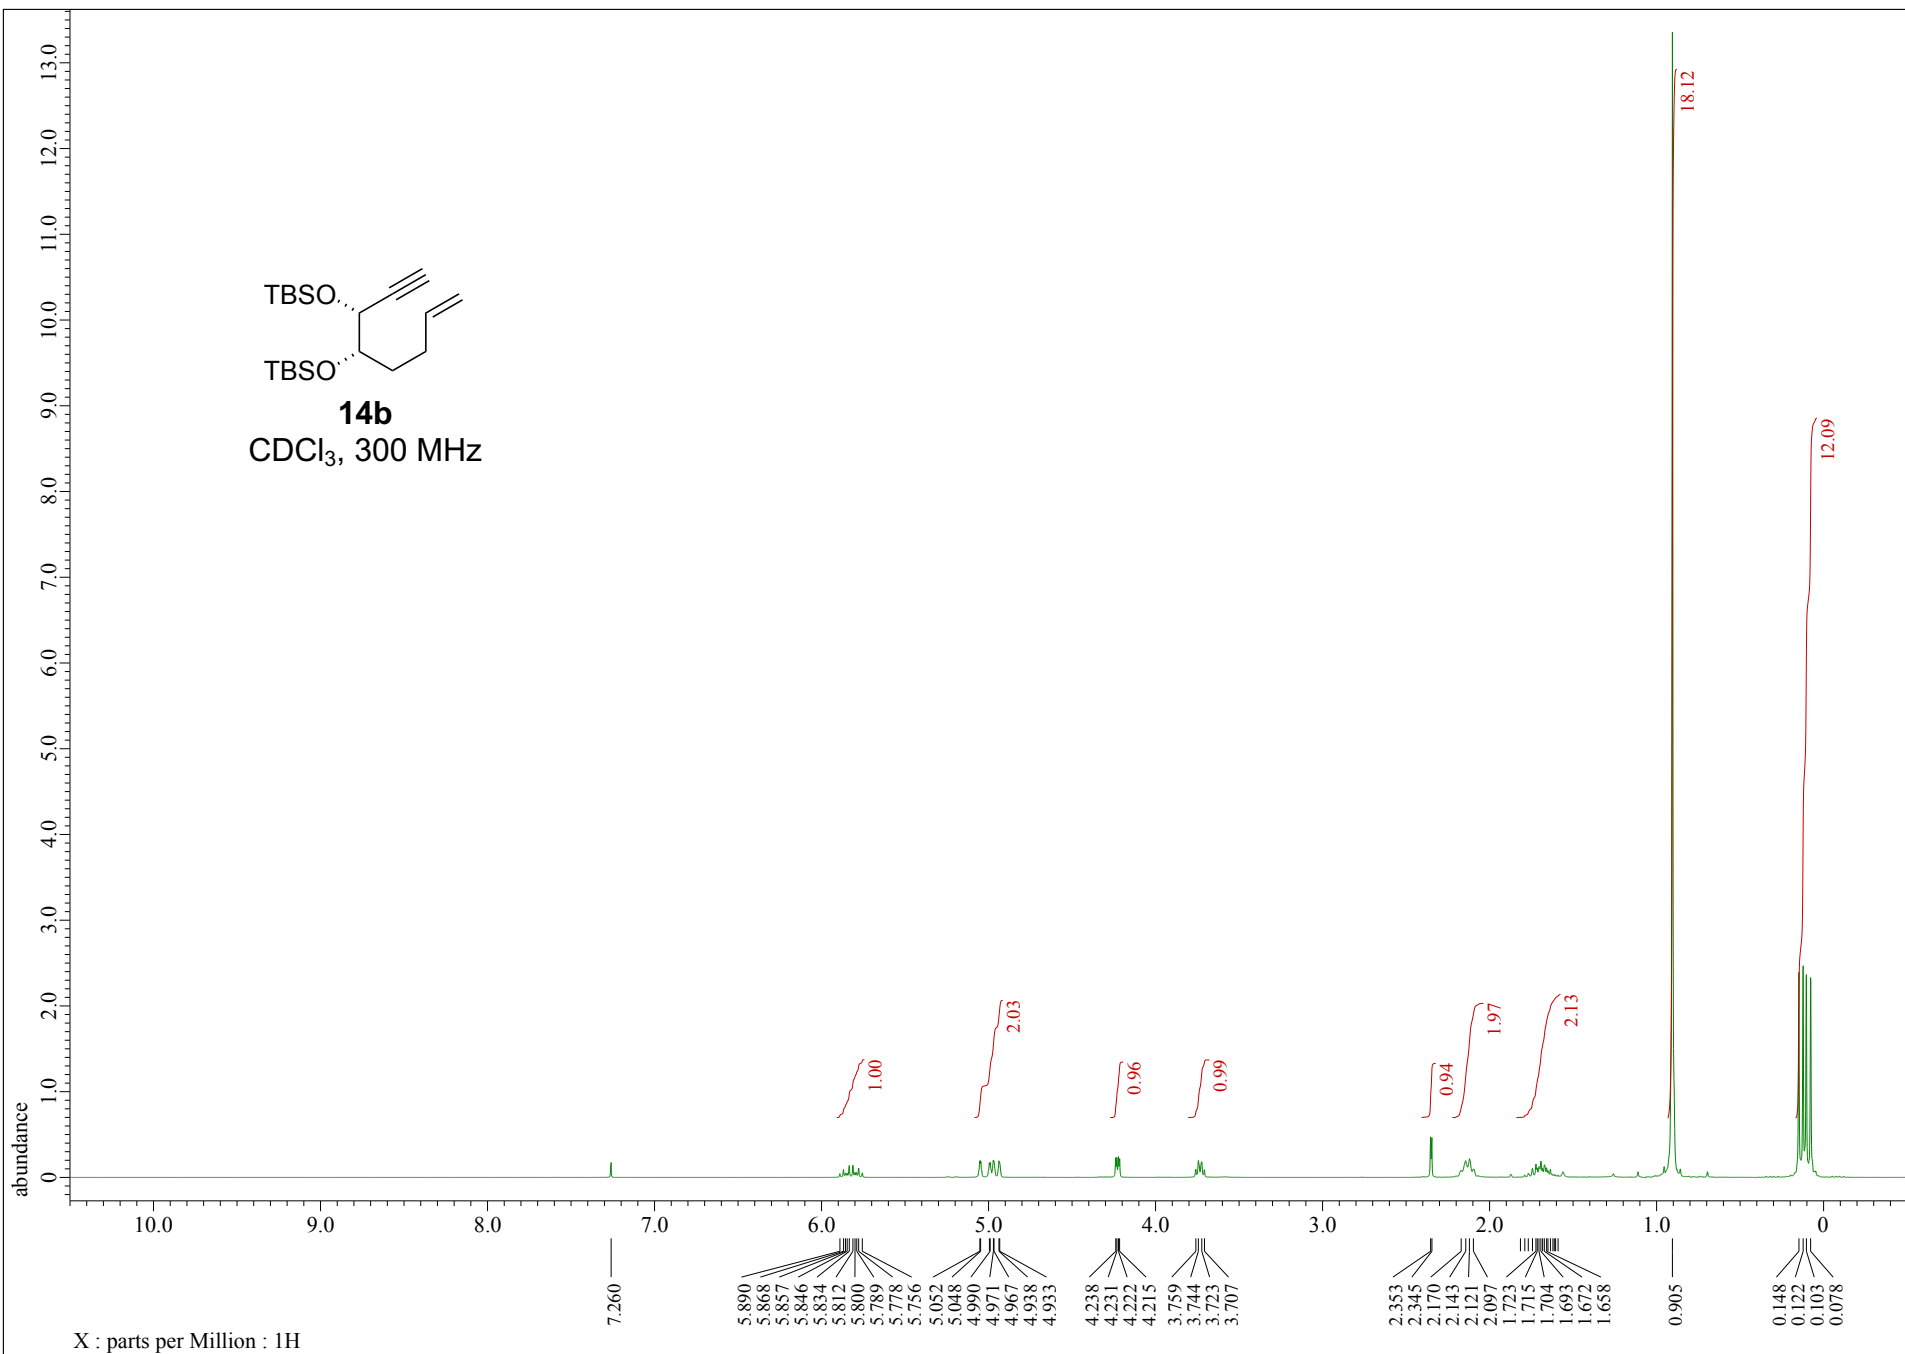

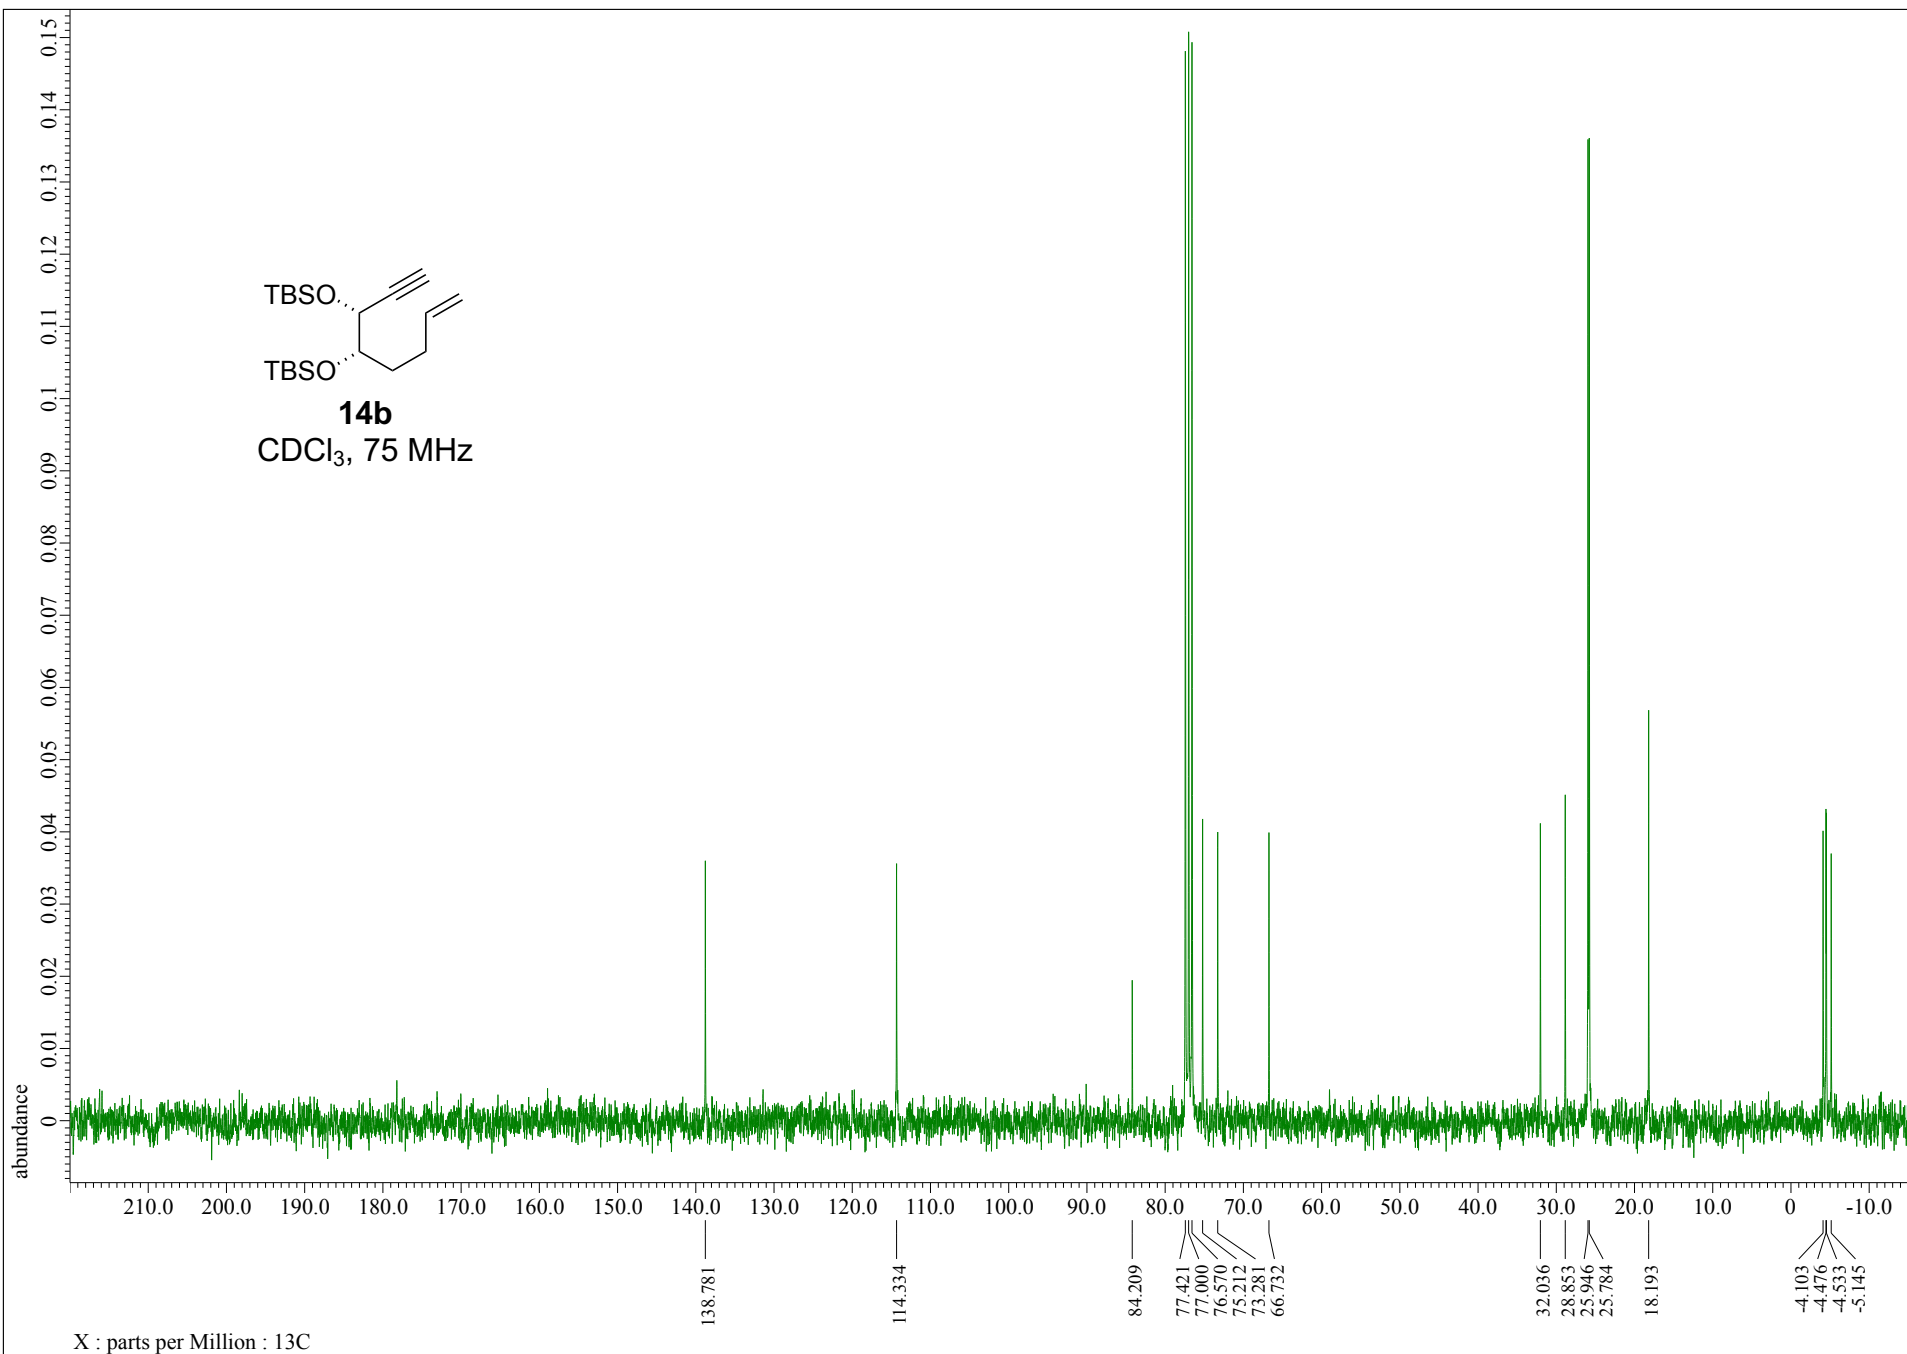

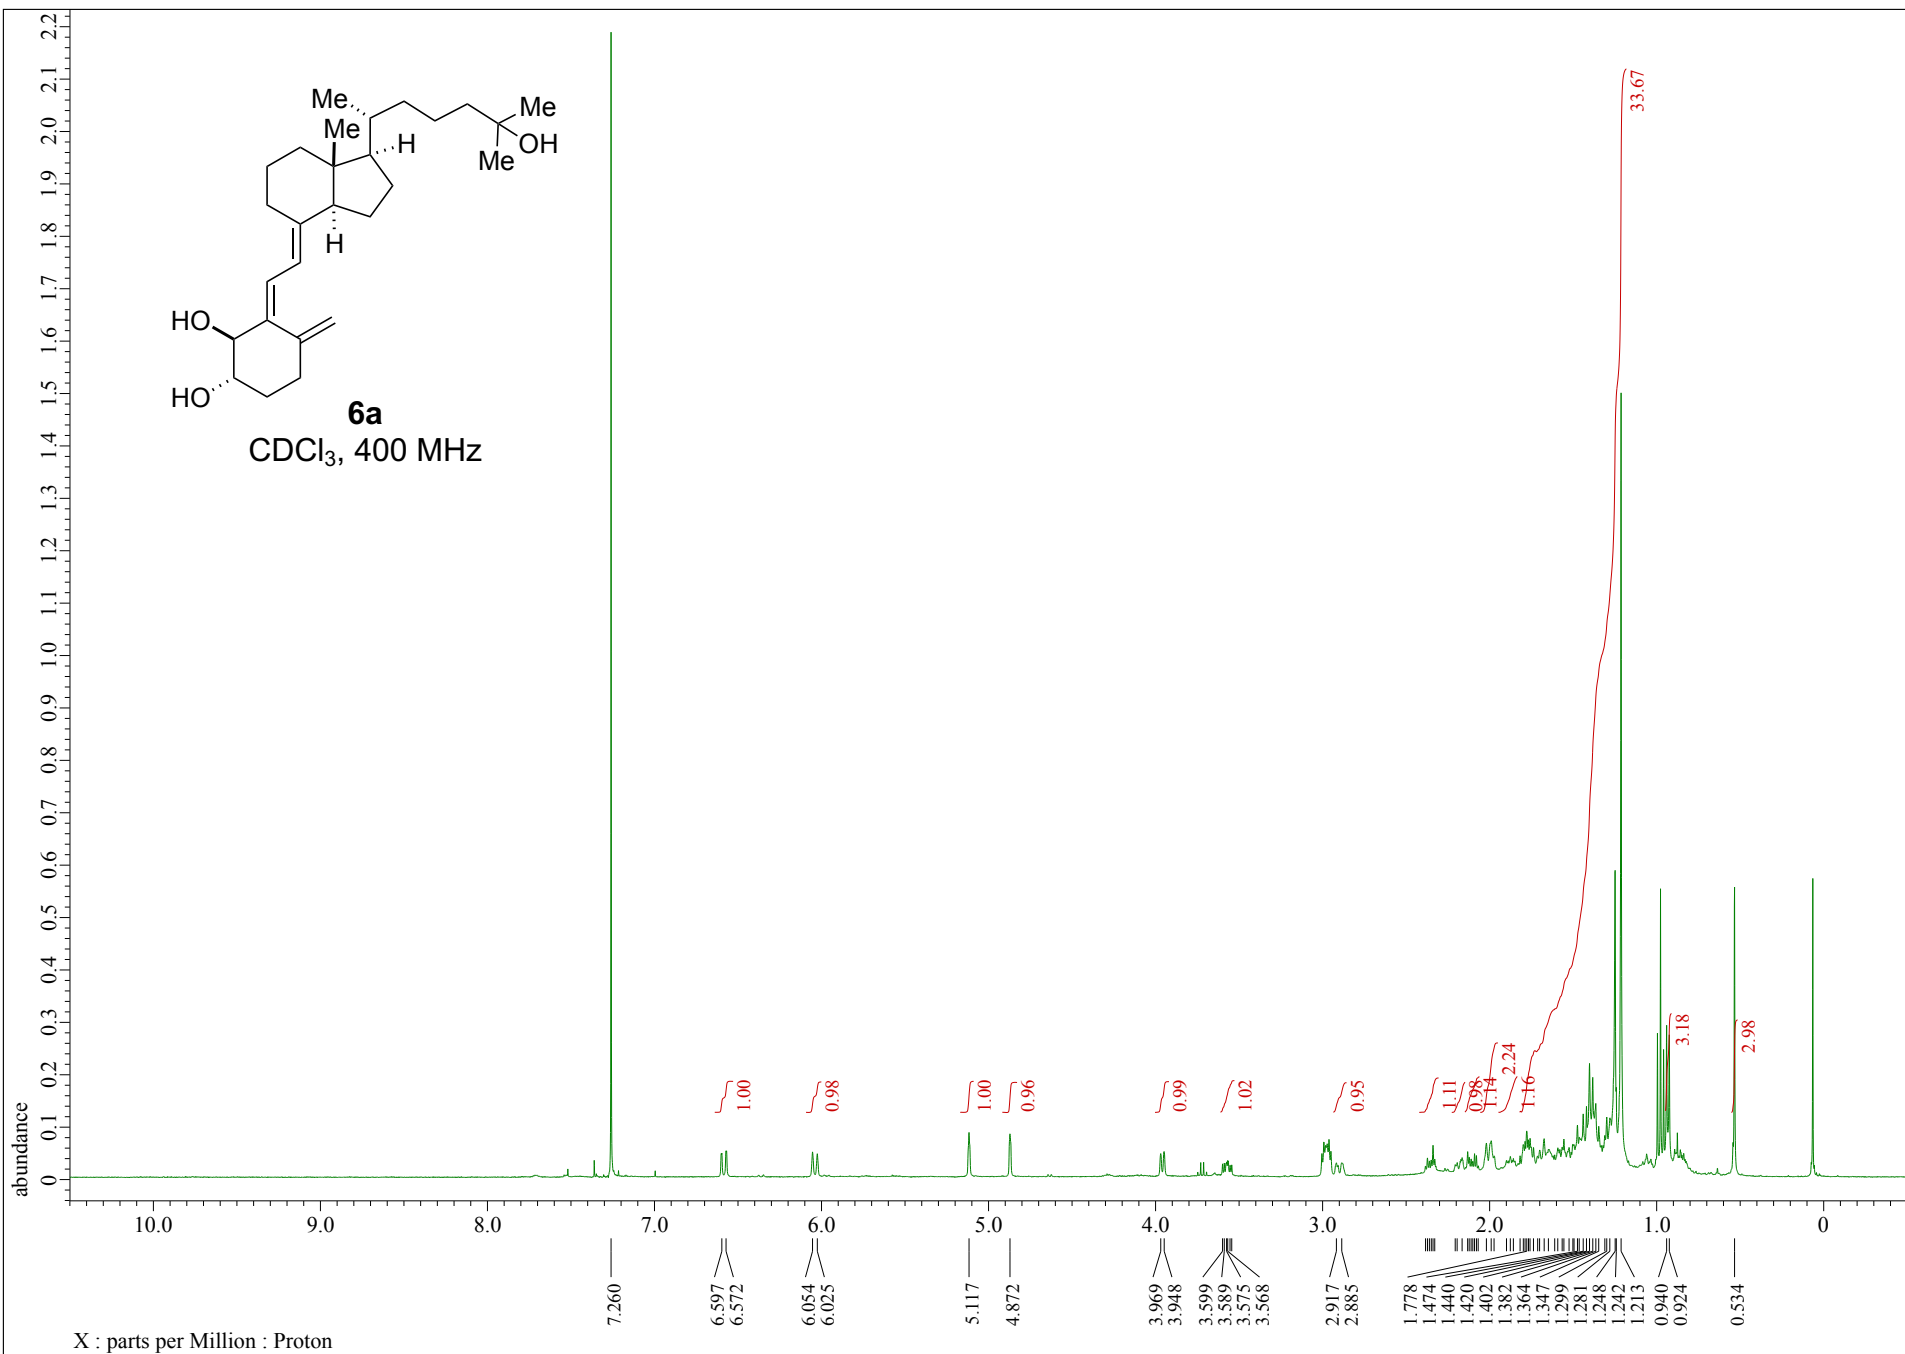

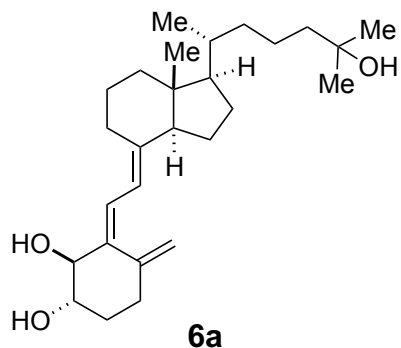

**6a**  
CDCl<sub>3</sub>, 100 MHz

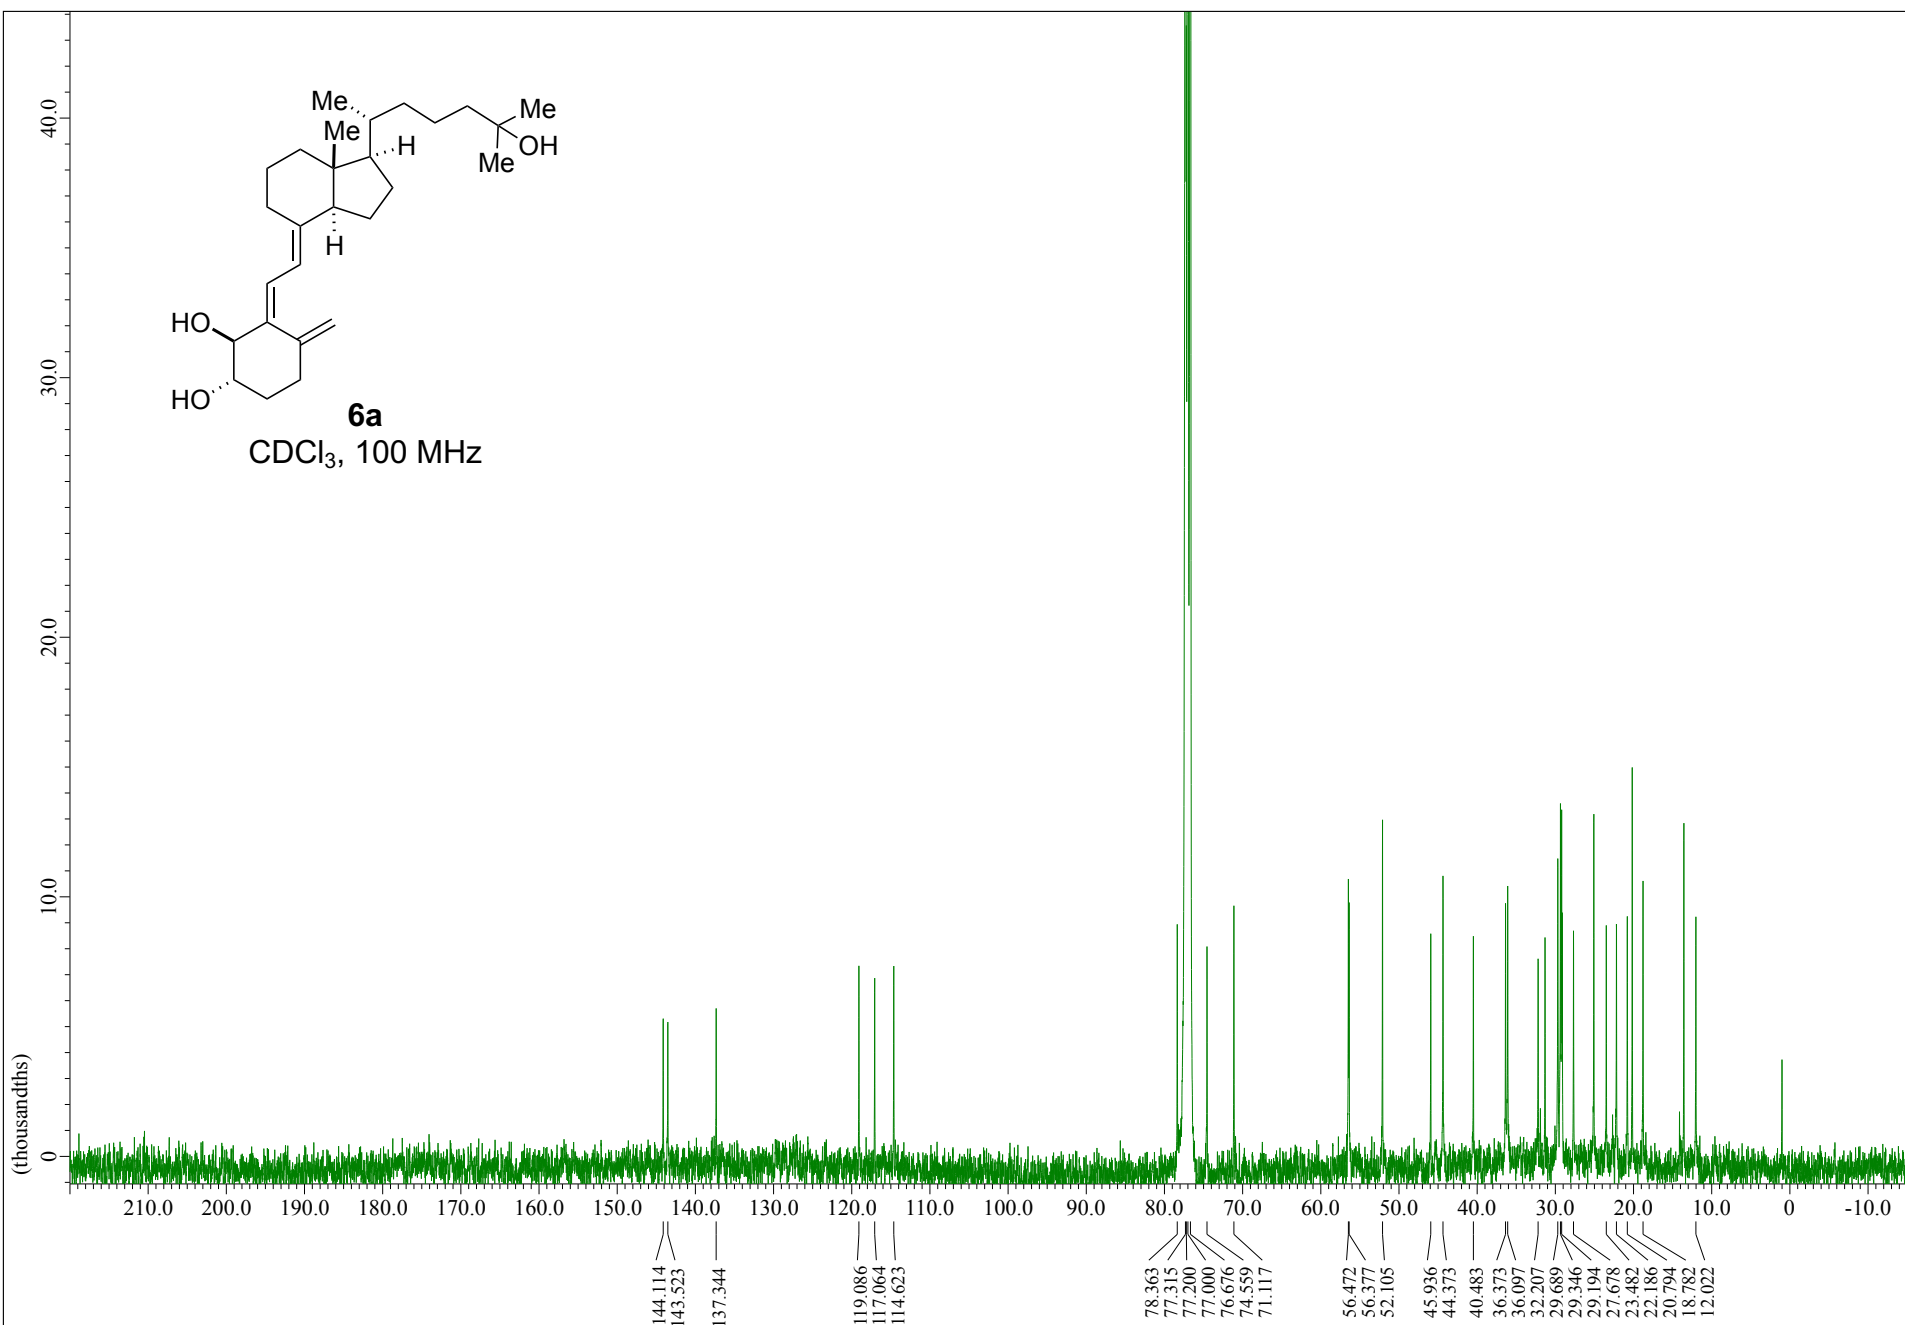

X : parts per Million : Carbon13

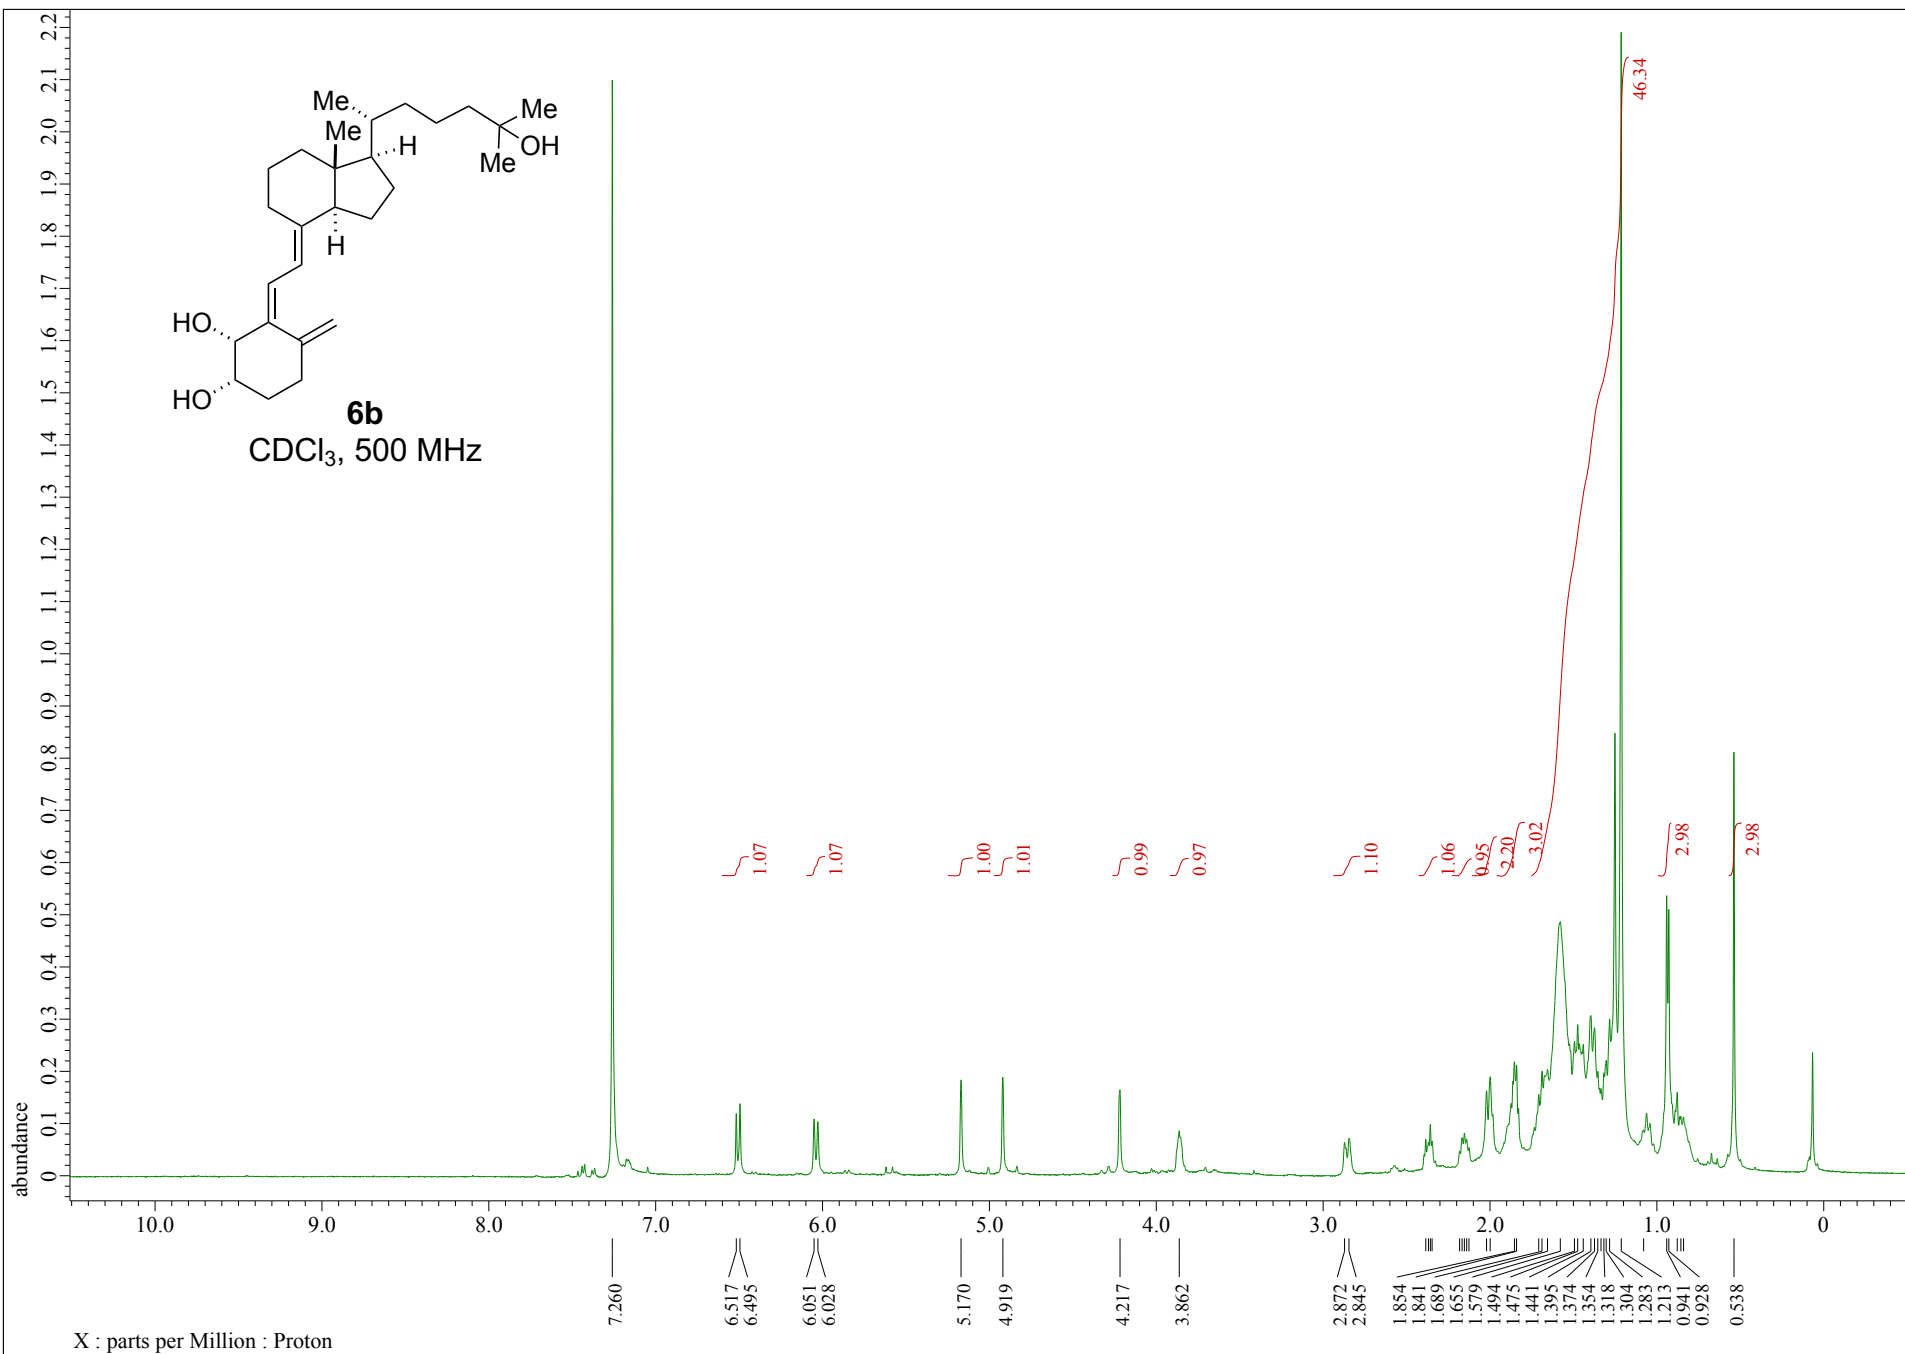



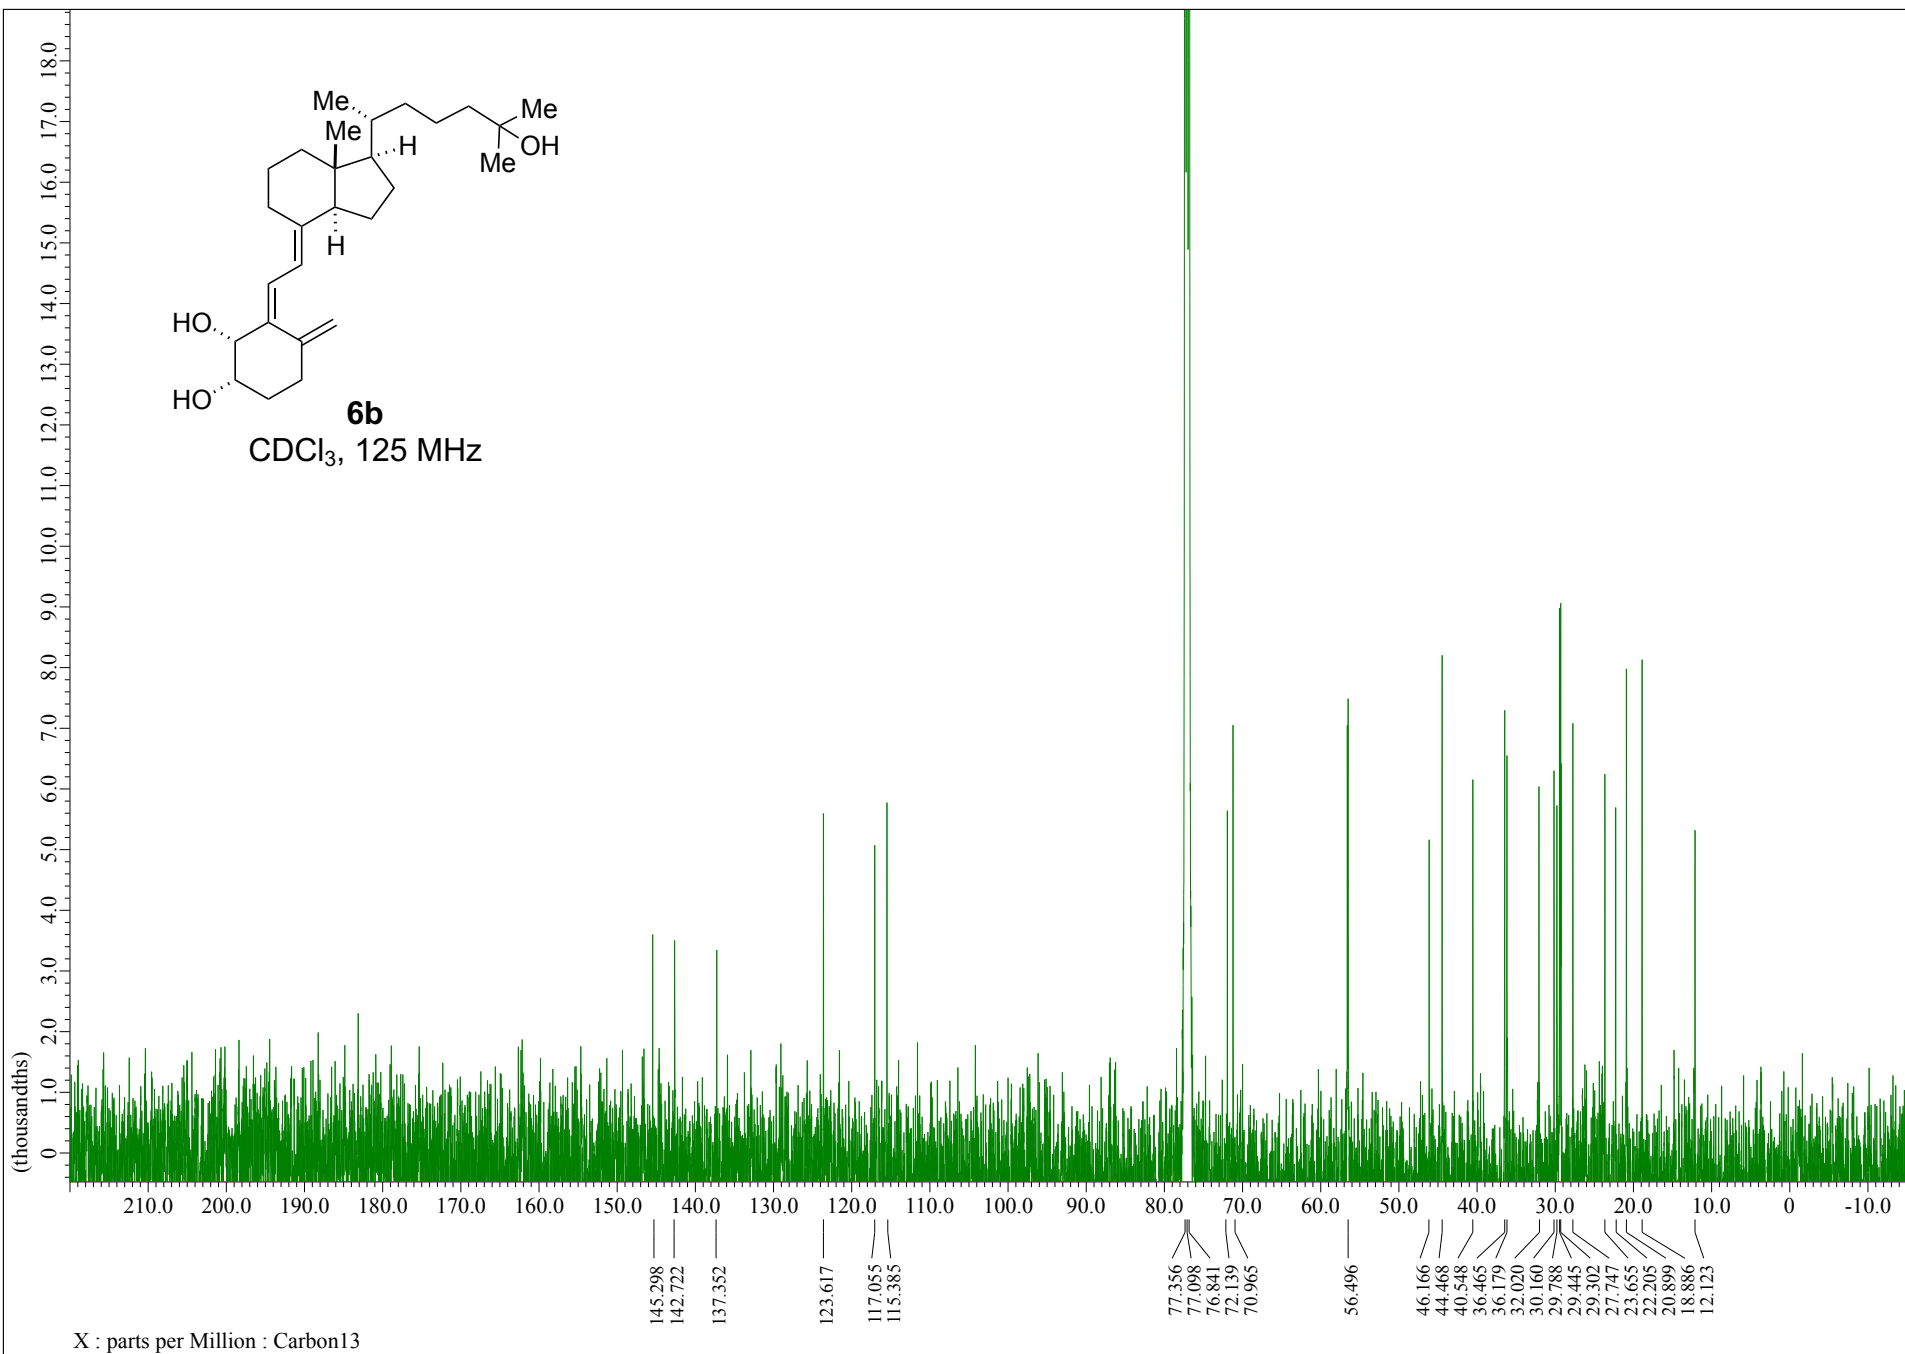

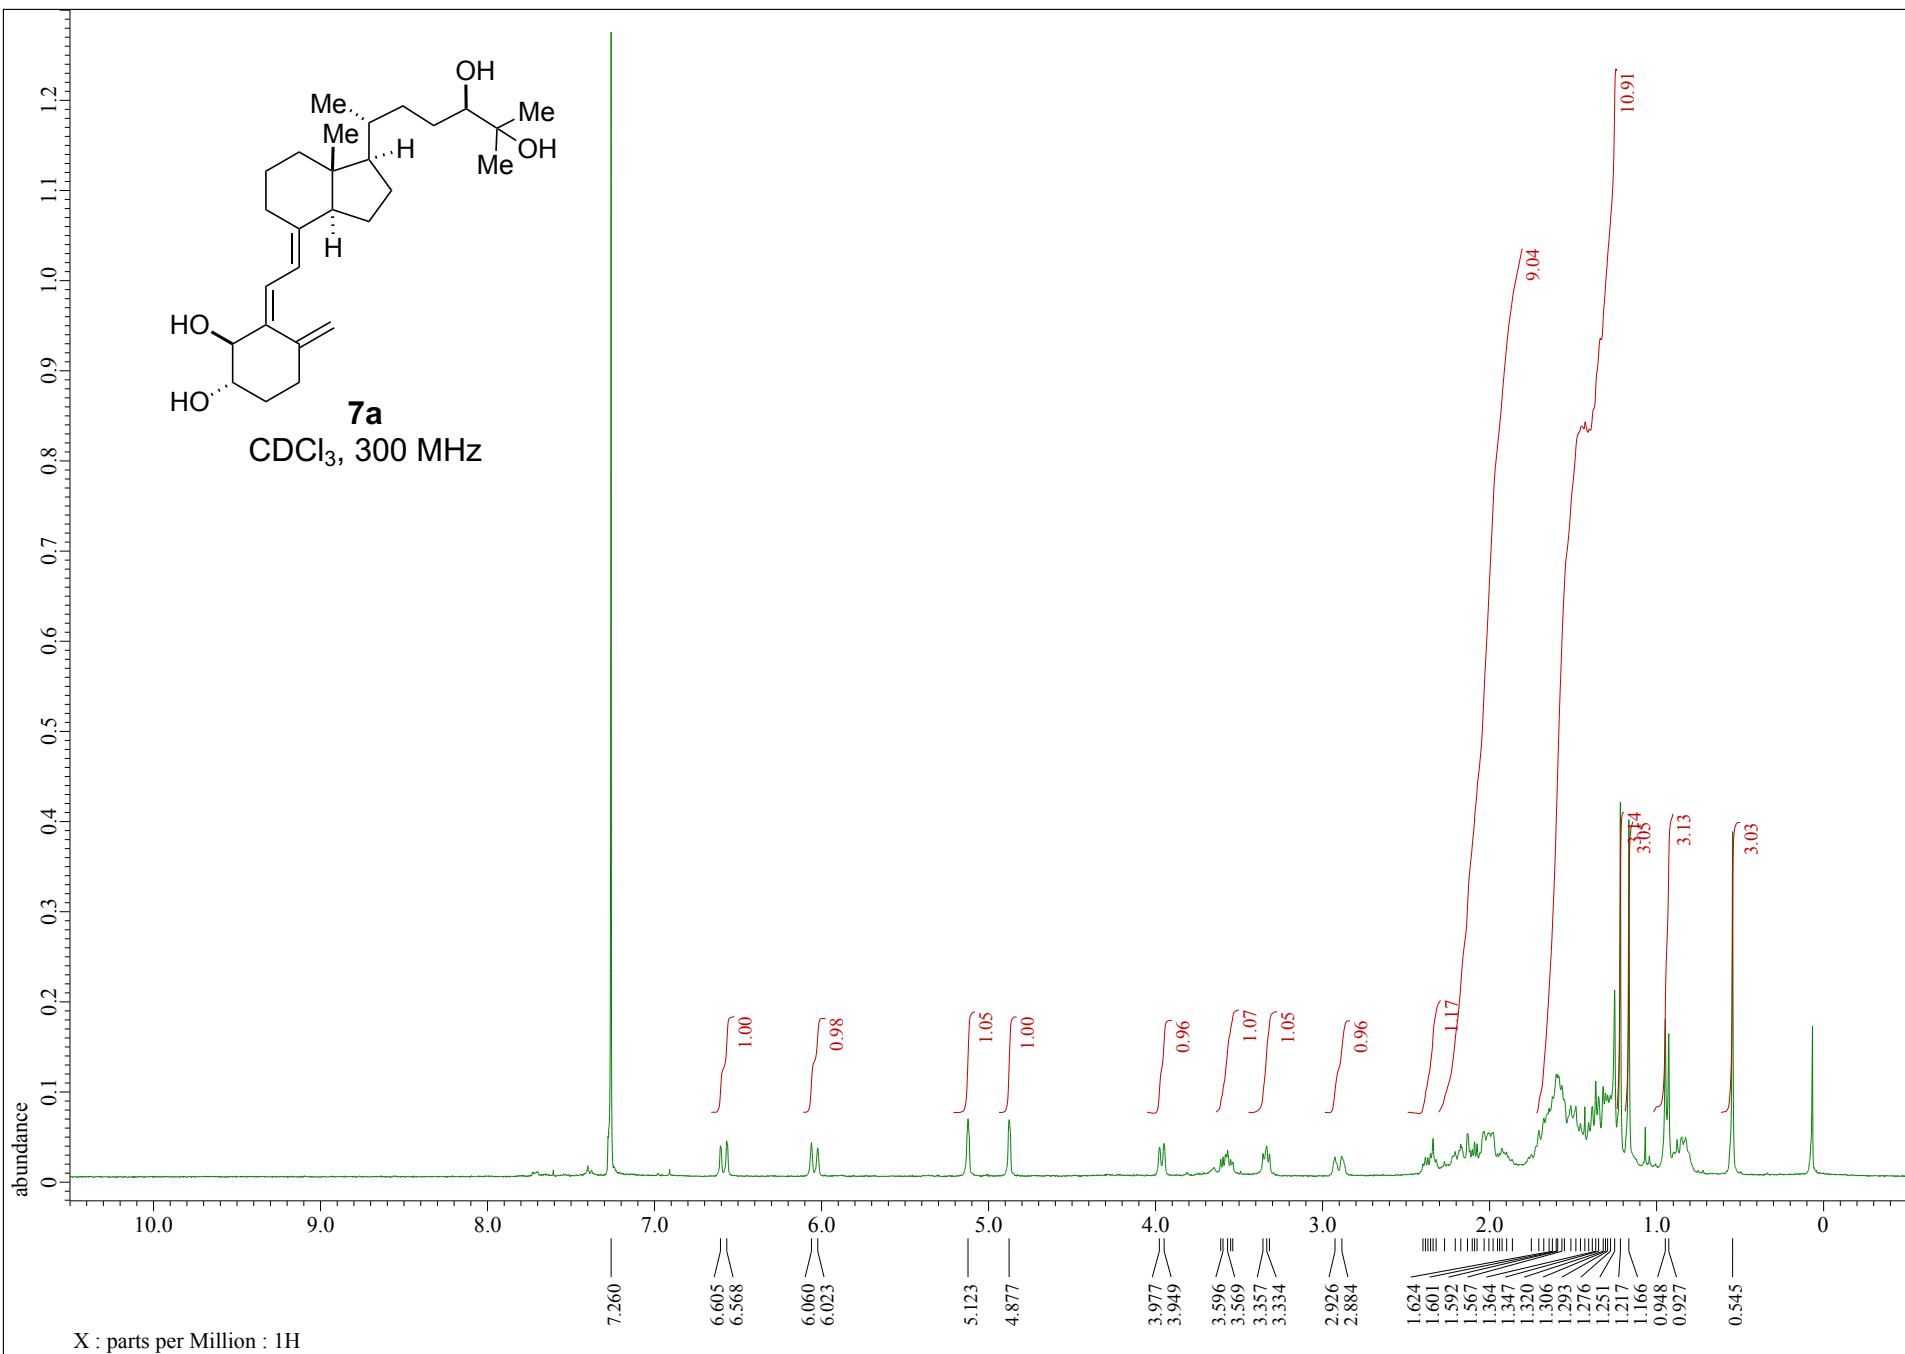

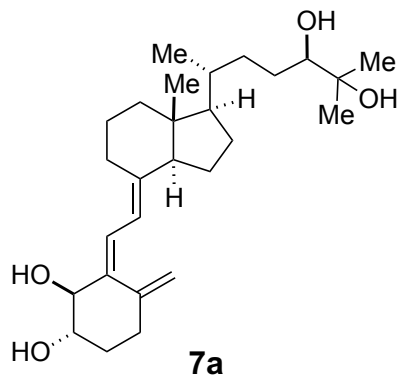

**7a**  
CDCl<sub>3</sub>, 125 MHz

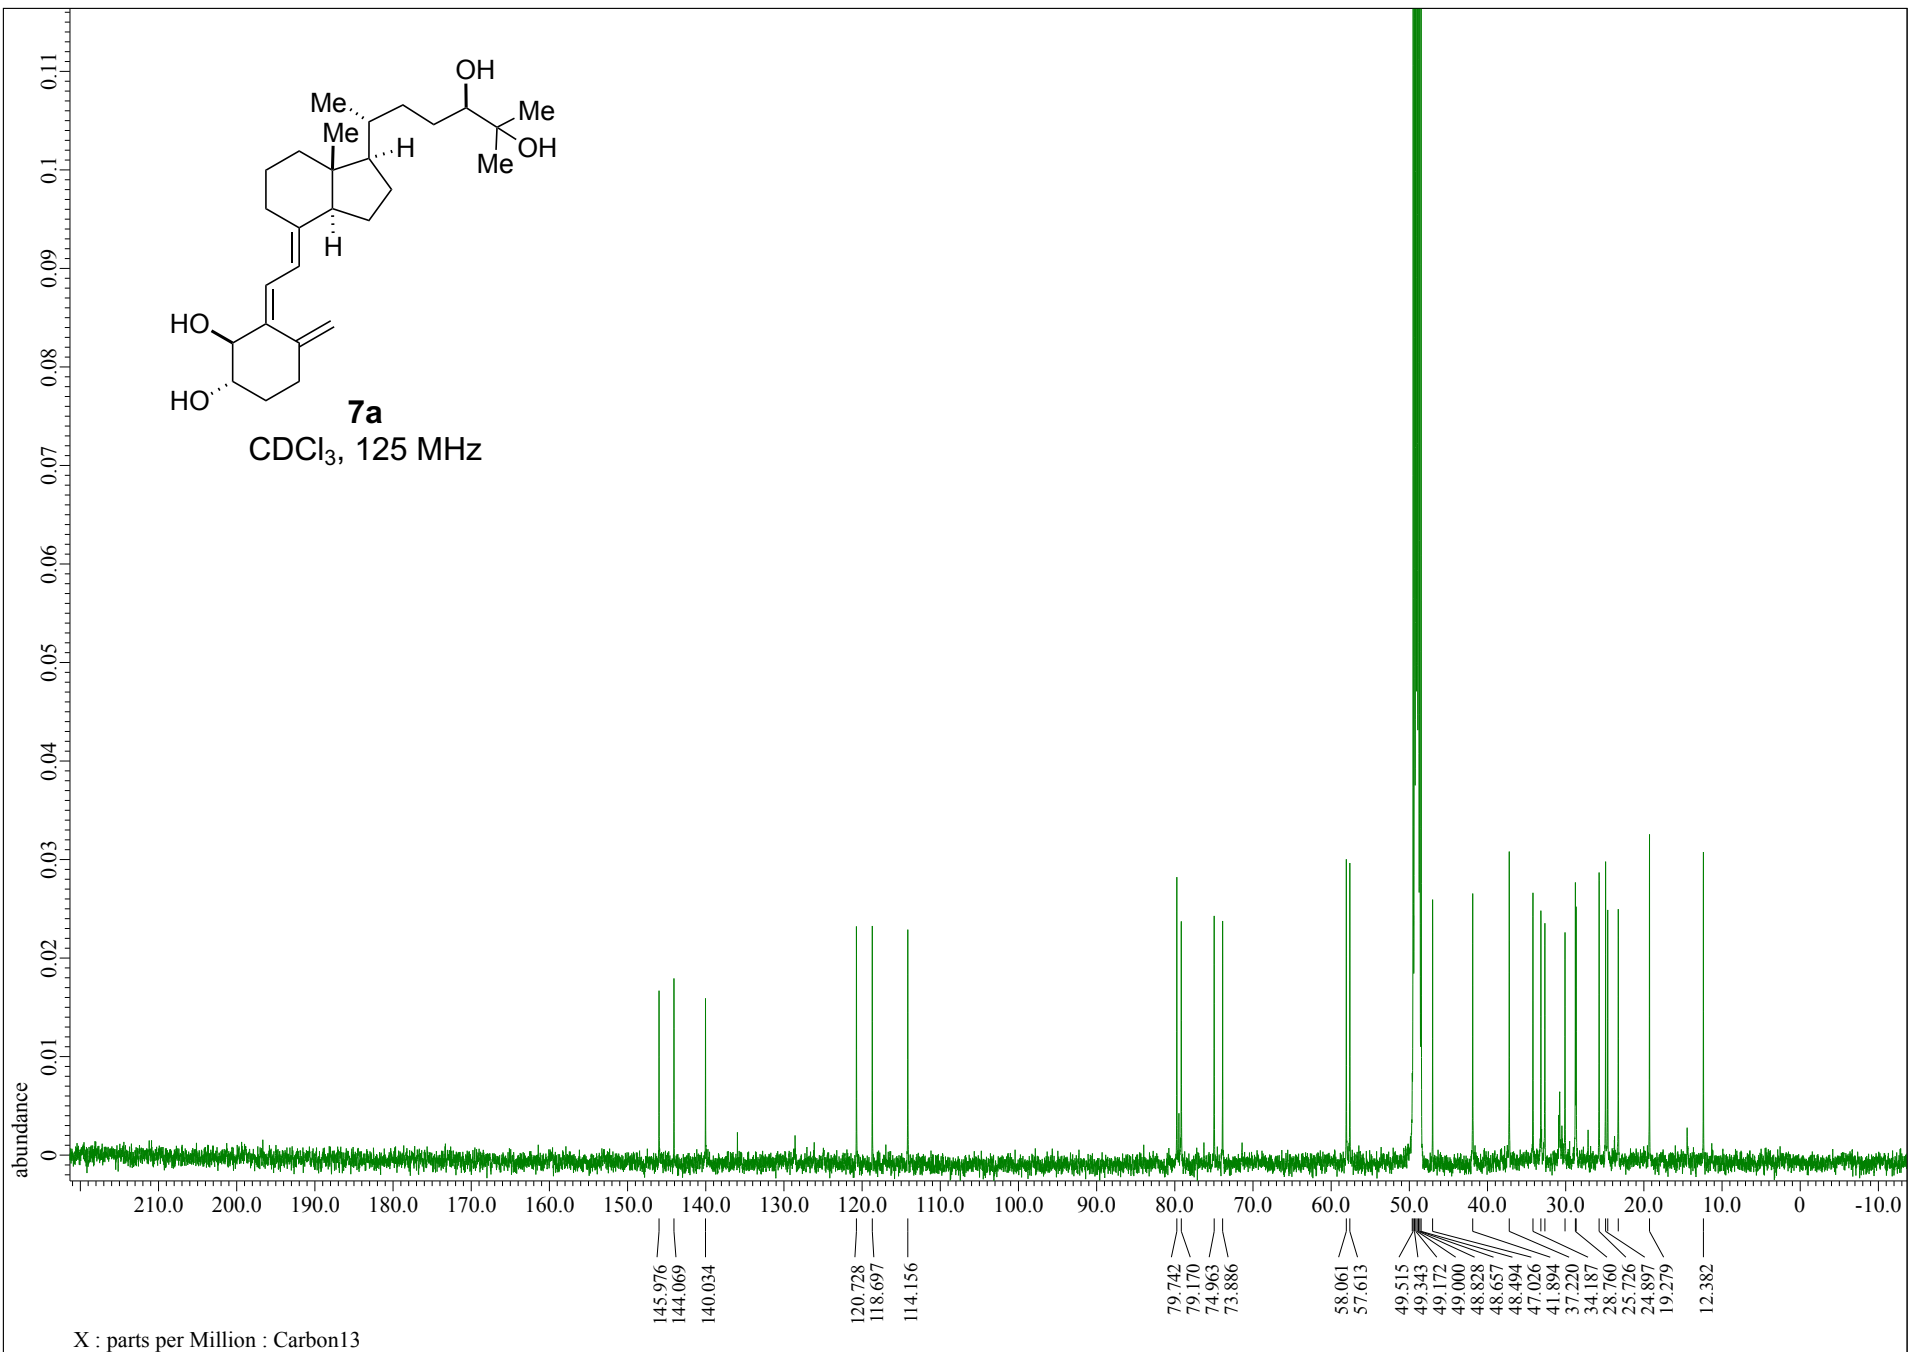

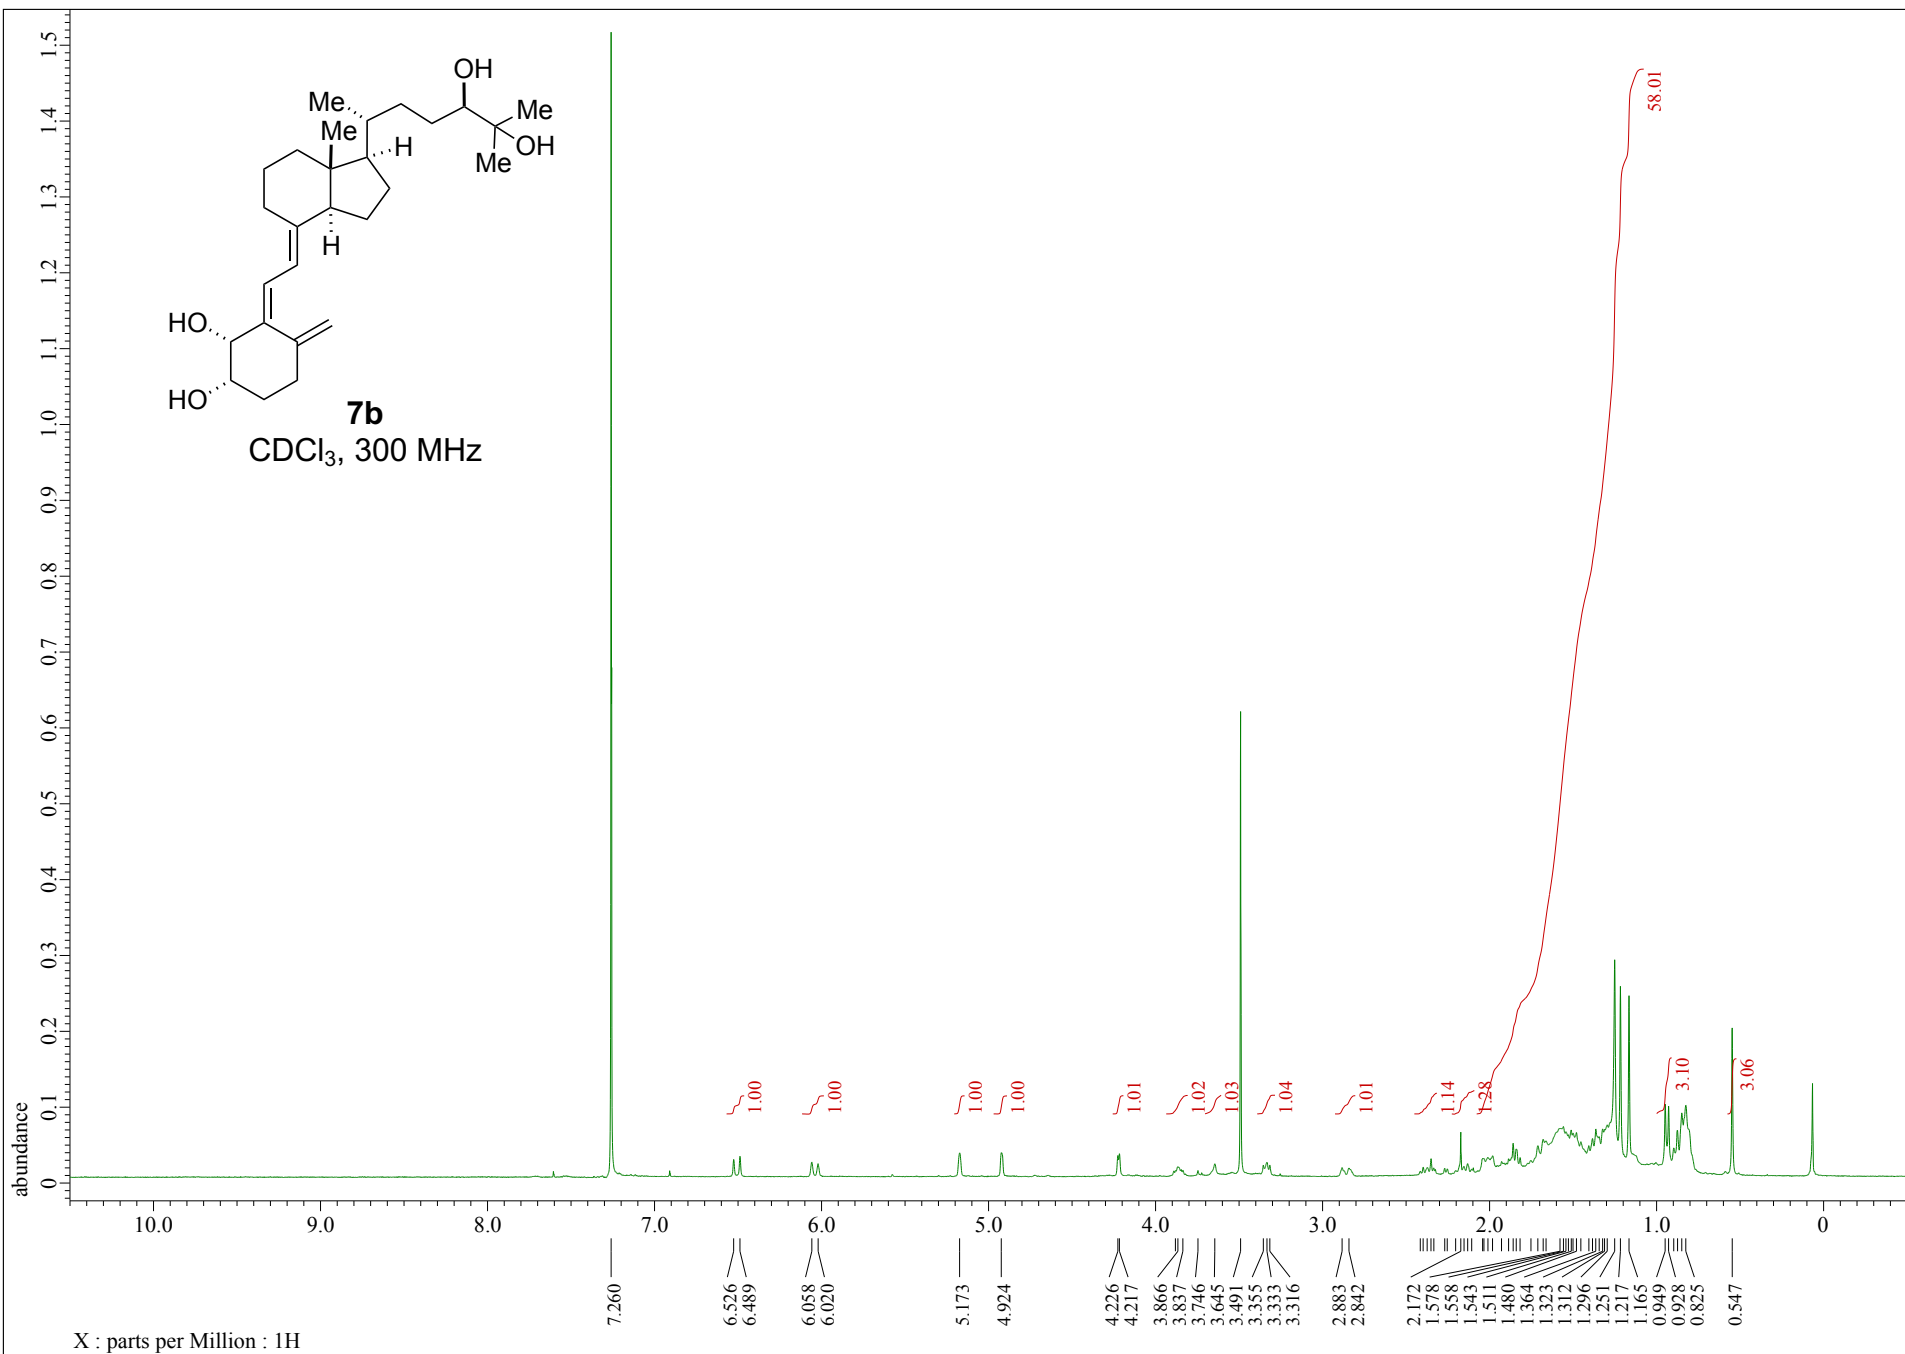

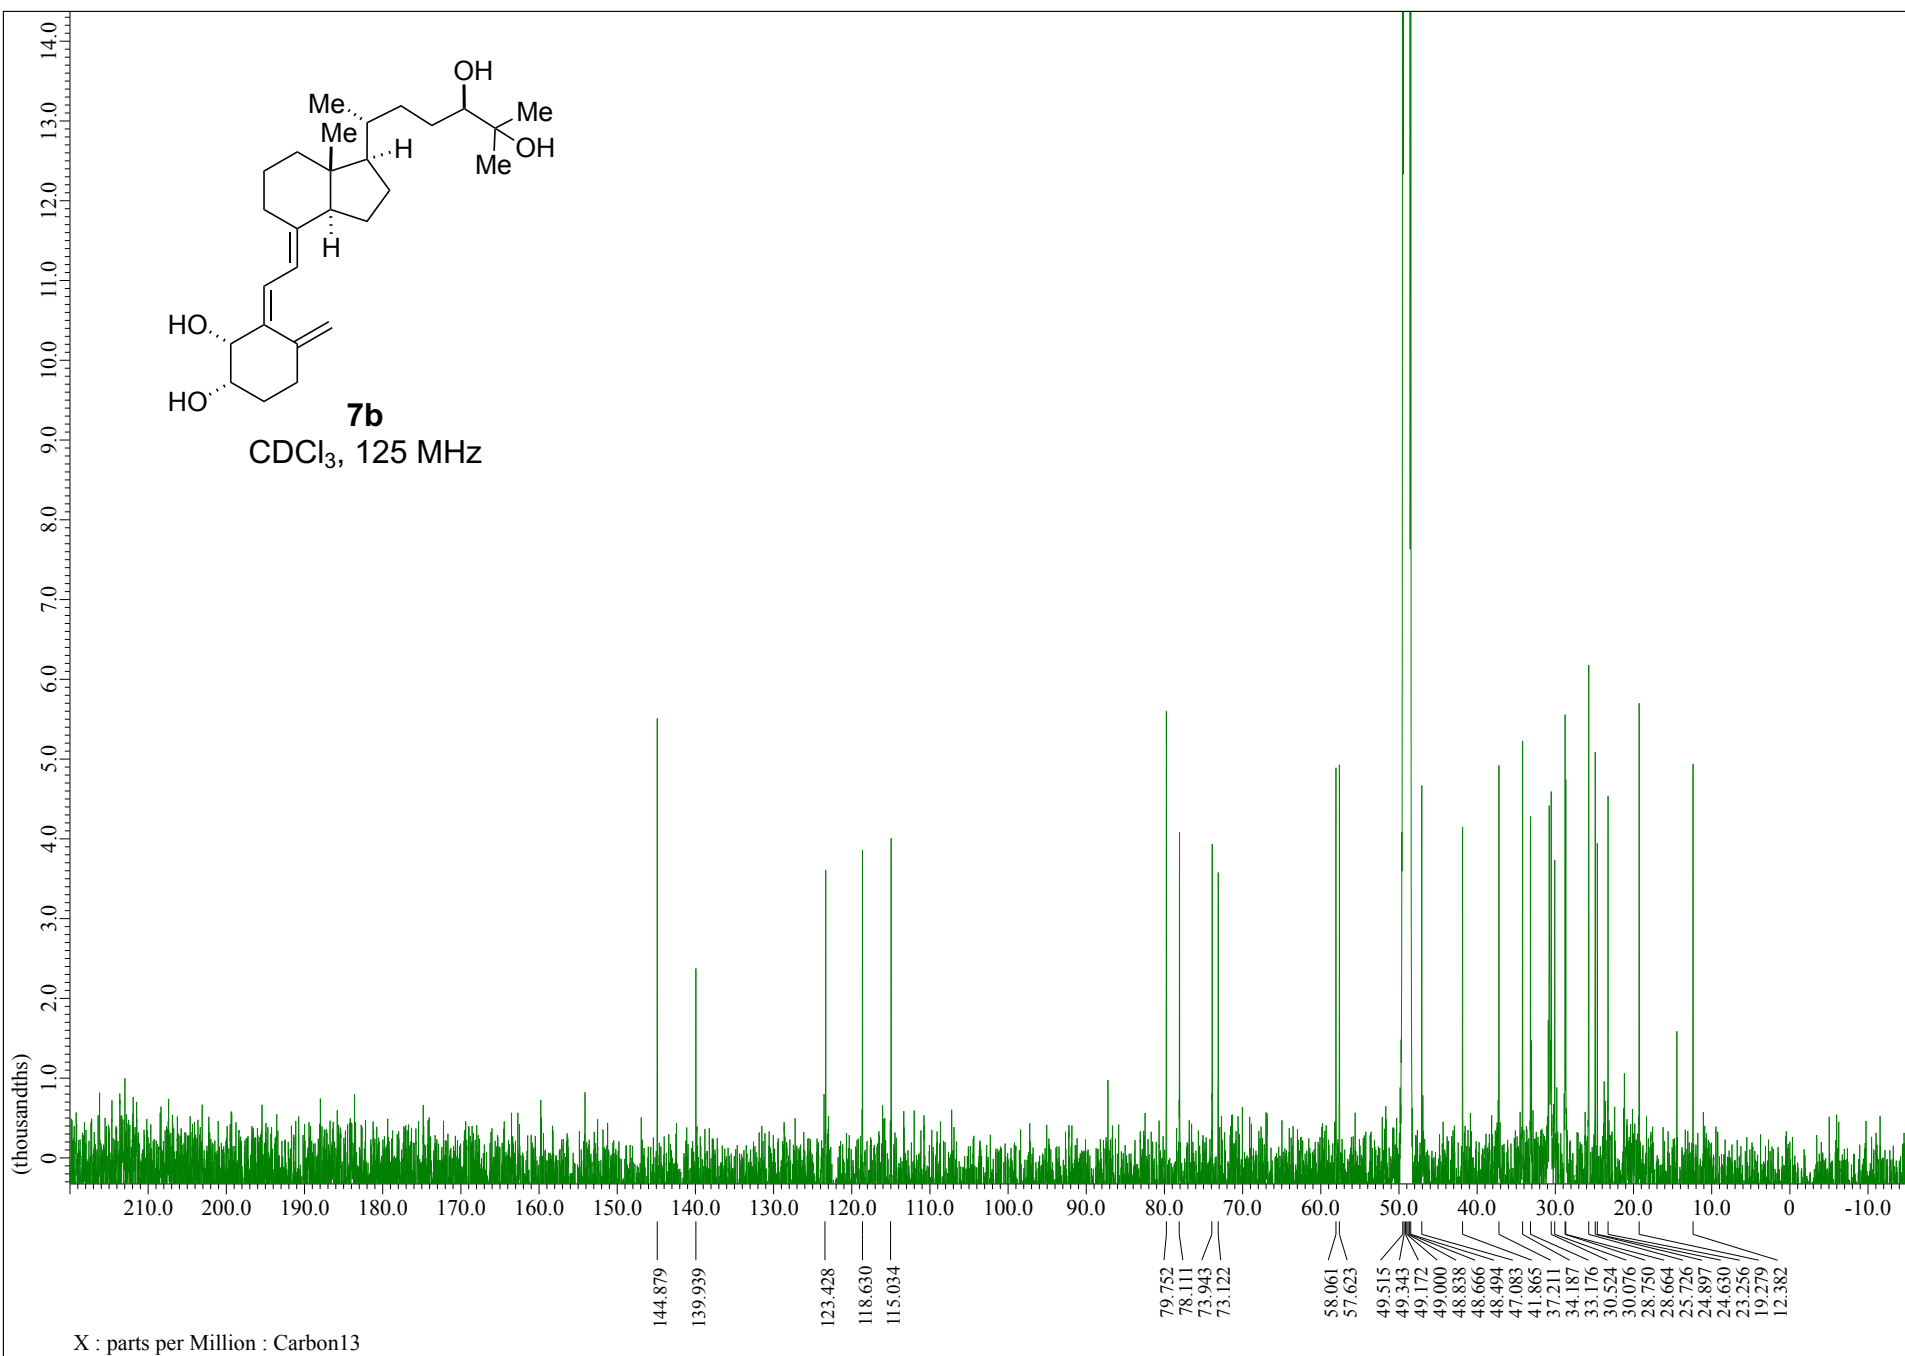

Supplement: s1 [file s1]
